# Supplementary material
Source: publisher figshare collection journal article supplement (https://tandf.figshare.com/ndownloader/files/37688165)
Supplement: Supplementary file 1 [file 37688165]

## Sheet: Original
Sample	Hole ID	From	To	X	Y	Z	Chemoclassification	Rock type	Logged alteration	SiO2_pct	Al2O3_pct	Fe2O3_pct	MgO_pct	CaO_pct	Na2O_pct	K2O_pct	TiO2_pct	P2O5_pct	MnO_pct	Cr2O3_pct	Sc_ppm	LOI_pct	Sum_pct	Ba_ppm	Be_ppm	Co_ppm	Cs_ppm	Ga_ppm	Hf_ppm	Nb_ppm	Rb_ppm	Sn_ppm	Sr_ppm	Ta_ppm	Th_ppm	U_ppm	V_ppm	W_ppm	Zr_ppm	Y_ppm	La_ppm	Ce_ppm	Pr_ppm	Nd_ppm	Sm_ppm	Eu_ppm	Gd_ppm	Tb_ppm	Dy_ppm
S1600040368	SVASJ280	234.1	234.35	545370	6.73057e+06	5.02607	Dacite A	Metamafite		73.34	11.11	5.99	2.23	1.22	2.36	1.2	0.33	0.1	0.1	0.002	12	1.8	99.87	678	2	7.4	1.2	14.6	4.4	11.2	37.8	5	88.2	0.8	11.7	4.2	105	1.6	153.8	26.3	41.1	75.8	8.98	33.9	6.3	1.29	5.6	0.78	4.69
S1600040369	SVASJ280	306	306.85	545333	6.73061e+06	-37.8523	Mafic	CSBC		53.32	15.89	11.5	9.39	0.62	0.15	1.83	1.06	0.42	0.19	<0.002	34	5.5	99.89	325	1	21.2	1.6	19.9	2.6	5.8	43.5	2	5.3	0.4	5.7	2.5	157	0.7	100.3	20.3	20	40.4	5.22	21.5	4.2	0.93	4.32	0.62	3.81
S1600040370	SVASJ280	249.3	250.1	545362	6.73058e+06	-4.42329	Dacite C	CSBC		53.72	13.54	14.89	11.87	0.31	0.09	0.25	0.42	0.11	0.14	0.007	13	4.5	99.89	44	<1	12	1.8	23.6	3.7	10.7	10	<1	6.4	0.9	12.9	6.2	119	2.5	125.1	13	10.3	20.7	2.51	10	1.8	0.1	1.82	0.25	1.75
S1600040371	SVASJ280	210.9	211.1	545382	6.73055e+06	19.4335	Dacite A	SC		76.86	11.84	3.21	0.98	0.23	0.91	3.61	0.16	0.05	0.03	<0.002	5	1.7	99.87	2312	<1	3.2	0.5	11.5	3.4	7.3	81.9	3	35.6	0.7	13.7	4.8	26	2.4	121.7	20.1	32.6	56.9	6.15	19.9	3.5	0.74	3.26	0.48	3.17
S1600040372	SVASJ280	225.55	225.7	545374	6.73056e+06	10.3344	Mafic	Metamafite		57.06	15.98	11.98	3.41	3.38	2.63	0.71	1.14	0.27	0.24	0.003	32	3	99.79	154	2	27.6	1.6	20.6	4.3	10.1	25.4	4	175.5	0.8	8.8	2.7	310	1.4	159.2	31.4	29.5	59.2	7.61	29.2	6	1.37	6.04	0.92	5.42
S1600040374	SVASJ280	331.9	332.1	545320	6.73063e+06	-52.7257	Mafic	CSBC		59.95	15.07	8.96	4.14	3.41	2.08	2.66	0.67	0.2	0.11	<0.002	24	2.5	99.85	926	2	17.4	3	14.3	2.9	6	63.9	1	141.4	0.5	7.9	2.7	178	0.6	106.2	21.2	22.6	44.8	5.11	19.6	3.8	0.98	3.73	0.57	3.73
S1600040375	SVASJ280	186.85	187.05	545394	6.73054e+06	34.525	Dacite B	SC		77.55	11.8	2.32	0.5	0.89	5.42	0.32	0.16	0.03	0.04	<0.002	9	0.8	99.87	595	2	1.9	<0.1	9.6	4.6	9.4	5.5	2	116.5	0.8	11.8	4.3	8	0.5	169.3	24.1	31.8	60	6.73	23.5	4.4	0.62	3.98	0.63	4.01
S1600040376	SVASJ280	325.5	325.7	545323	6.73062e+06	-49.0238	Mafic	CSBC		51.79	17.59	10.04	9.55	0.78	0.46	3.52	0.77	0.2	0.2	<0.002	29	4.9	99.88	1029	<1	19.4	3.8	18.4	2.9	7.7	88.8	3	14.6	0.5	7.7	2.7	195	1.1	113.2	22.2	23.3	45.4	5.43	20.5	4.1	0.58	4.3	0.67	4.03
S1600040377	SVASJ280	257.1	258.1	545358	6.73058e+06	-9.19158	Marble/Skarn	Calc-silicate rock	Trem skarn	46.49	2.56	21.54	8.5	18.43	0.13	0.02	0.06	0.04	1.62	<0.002	5	0.5	99.87	15	5	10.3	0.1	6.7	1.5	2.7	0.6	15	13.6	0.3	4.6	8.4	20	9.1	50.9	9.4	16.8	25	2.78	9.8	1.7	3.68	1.58	0.24	1.28
S1600040379	SVASJ280	264.35	265.45	545355	6.73059e+06	-13.5383	Marble/Skarn	Calc-silicate rock	Trem skarn	40.91	0.85	23.36	3.62	27.05	<0.01	<0.01	0.01	0.02	1.97	<0.002	4	2.1	99.93	6	3	5.8	0.1	7	0.1	0.3	0.4	15	3.3	<0.1	0.3	2.8	13	25.7	4	4.3	1.4	4	0.53	1.8	0.3	0.47	0.35	0.05	0.38
S1600040380	SVASJ280	268.4	269.3	545353	6.73059e+06	-15.8762	Marble/Skarn	Calc-silicate rock	chl schist	52.92	1.95	17.72	19.37	5.45	0.21	0.05	0.02	0.05	0.87	<0.002	5	1.3	99.89	13	<1	9.2	0.2	6.7	0.2	<0.1	1.8	3	1.3	<0.1	0.7	1.8	26	<0.5	8.4	9	3.2	6.8	0.94	4.7	1.4	0.2	1.99	0.33	1.85
S1600040381	SVASJ280	314.8	315.6	545329	6.73062e+06	-42.9729	Mafic	CSBC		63.88	14.6	7.92	3.26	2.99	2.84	1.47	0.6	0.2	0.13	<0.002	20	1.9	99.86	335	<1	13	2	16.2	3.5	6.9	39.3	1	167.6	0.6	9	3.2	92	0.7	122.5	24.8	24.9	48.8	5.79	22.2	4.1	1.1	4.07	0.63	3.88
S1600040382	SVASJ281	165.2	165.4	545291	6.73056e+06	34.0959	Dacite A	SC	Coherent?	76.54	10.62	2.76	3.86	0.31	0.93	1.96	0.18	0.05	0.04	0.002	6	2.6	99.91	540	<1	4.9	2.3	10.2	2.6	6.2	48.7	1	19.8	0.6	11.3	3.8	25	0.5	84.6	17.1	35.3	61.7	6.5	21.3	3.4	0.55	3.02	0.44	2.79
S1600040383	SVASJ281	161.65	161.9	545293	6.73056e+06	36.6885	Dacite C	SC	Sediment?	69.51	13.35	4.81	4.45	0.61	1.94	2.19	0.38	0.09	0.06	<0.002	14	2.4	99.9	792	2	8	1.4	13.6	2.8	7.1	47.7	2	35	0.7	12.4	4.4	67	1.6	100.7	18.9	34.7	62.1	6.73	23	3.9	0.71	3.47	0.51	3.09
S1600040385	SVASJ281	154.45	154.7	545296	6.73055e+06	42.0101	Tholeiitic Mafic	Dolerite dyke	Unaltered	46.01	16.13	11.84	9.1	9.88	1.36	2.03	0.82	0.08	0.21	0.027	42	2.3	99.87	559	<1	52.2	0.8	15.1	1.1	0.5	53.6	<1	73.5	<0.1	<0.2	<0.1	246	<0.5	37.6	18.4	2.6	6.3	0.99	5.5	1.8	0.69	2.68	0.48	3.15
S1600040386	SVASJ281	92.25	92.5	545323	6.73052e+06	88.1852	Mafic	Metamafite		56.09	15.65	10.02	3.43	7.03	3.16	1.28	0.65	0.19	0.18	<0.002	27	2.1	99.83	429	<1	24.3	0.2	17.6	2.7	6.3	33.1	2	250.5	0.5	6.4	2.6	202	1.7	90.2	24.1	20.7	41.1	5.2	20.5	4.2	1.14	4.36	0.69	4.24
S1700016215	SVASJ279	24.6	24.85	545291	6.73057e+06	136.166	Mafic	Metamafite	Weak	49.7	17.42	12.07	7.17	3.77	1.02	3.28	1.42	0.32	0.18	<0.002	40	3.4	99.75	366	<1	32.7	4.3	20.7	3.8	8.2	70.7	3	140.1	0.5	5	2.3	250	0.6	140.7	32.5	25.8	54.4	6.57	25.9	5.5	2.17	5.76	0.95	5.93
S1700016216	SVASJ279	34.4	34.65	545287	6.73057e+06	128.586	Dacite A	SC	Musc-q-cord-chl (4)	67.08	14.41	3.43	7.39	0.2	0.4	2.13	0.38	0.06	0.05	<0.002	20	4.3	99.84	318	<1	1.3	1	15.9	4.9	16.8	34.1	3	11.3	1.2	13.9	6.2	<8	4.3	175.2	31.5	36.6	72.1	8.03	28.8	5.9	0.95	5.34	0.85	5.49
S1700016217	SVASJ279	53.15	53.4	545279	6.73058e+06	114.153	Dacite C	SC	chl-musc-cord (4)	66.78	13.1	5.16	7.27	0.28	0.22	2.23	0.39	0.11	0.07	<0.002	13	4.2	99.84	502	<1	8.6	1.3	14.3	3.3	6.2	38.6	2	7.6	0.5	11	5	58	0.8	108.2	17.8	30.3	54	5.56	19.5	3.3	0.72	3.13	0.48	2.95
S1700016218	SVASJ279	57.65	57.9	545277	6.73058e+06	110.701	Dacite A	Metamafite	cord-chl > musc (4)	70.25	13.42	3.78	5.16	0.15	0.81	2.43	0.28	0.06	0.05	<0.002	12	3.3	99.87	1381	<1	6.8	1.2	13.1	4.3	8.6	46.2	2	6.7	0.8	12.3	6.3	46	2.1	137	22.2	30.3	57.3	6.03	21.5	3.8	0.61	3.61	0.57	3.61
S1700016220	SVASJ279	93.35	93.6	545261	6.7306e+06	83.5031	Dacite A	Feldspar-phyric metavolcanic rock	Chl (1)	73.78	13.18	3.31	0.62	1.78	4.03	1.52	0.23	0.05	0.07	<0.002	11	1.3	99.93	839	1	3.1	0.6	12.7	4.7	8.4	36.5	2	155.3	0.8	13.4	6.1	14	<0.5	153.2	25.1	34.2	65.8	6.94	24.8	4.5	0.83	4.19	0.7	4.3
S1700016221	SVASJ279	104.75	104.95	545256	6.7306e+06	74.9075	Dacite A	Feldspar-phyric metavolcanic rock	chl >> cord (1-2)	71.61	12.23	4.53	2.34	2.83	2.58	1.43	0.26	0.04	0.08	<0.002	15	1.9	99.91	715	<1	0.8	0.9	15.7	3.9	7.3	32.2	2	135.3	0.6	8.7	3.4	<8	<0.5	141	29.5	28.2	57.1	6.33	24.1	4.9	1.07	4.59	0.75	5.08
S1700016222	SVASJ279	12.35	12.6	545297	6.73056e+06	145.657	Dacite C	SC	Chl > musc-cord (4)	67.36	13.12	5.59	6.83	0.23	0.18	1.75	0.49	0.11	0.02	<0.002	27	4.1	99.85	255	1	2.2	0.6	16.8	3.9	8.3	31.8	3	3.9	0.7	9.7	4.3	<8	1.5	135.2	28.3	28.3	55.6	6.31	24.4	4.7	1.12	4.6	0.76	4.86
S1700016223	SVASJ279	115.7	115.9	545252	6.73061e+06	66.6453	Dacite A	Feldspar-phyric metavolcanic rock	Least altered	74.32	12.33	2.61	1.93	1.55	4.46	0.84	0.26	0.05	0.05	<0.002	8	1.3	99.93	1734	<1	2.1	0.1	11	4	7.7	10.7	2	110.5	0.7	14.4	6.4	21	<0.5	137.4	20.4	29.6	54.9	5.85	21	3.7	0.67	3.33	0.56	3.42
S1700016224	SVASJ279	125.6	125.8	545247	6.73061e+06	59.1996	Mafic	Metamafite	chl-epid-mag (1)	49.94	15.93	13.43	7.94	3.46	1.62	1.49	0.91	0.22	0.14	<0.002	38	4.7	99.77	412	2	30.1	0.9	17.2	2.1	3.7	32.3	<1	117.9	0.4	4.8	2	267	<0.5	75	20	16.6	34.4	3.88	14.6	3.1	0.9	3.43	0.54	3.53
S1700016225	SVASJ279	157	157.3	545233	6.73063e+06	35.9762	Dacite A	SC	Musc-chl (1)	70.45	12.12	5.07	3.47	2.33	2.08	1.73	0.28	0.06	0.13	<0.002	16	2.1	99.9	579	1	2	1.4	14	3.8	6.8	45	1	68.5	0.5	8.1	3.2	<8	<0.5	128.3	26.1	27.6	52.4	6.03	22.5	4.4	1.01	4.24	0.7	4.45
S1700016226	SVASJ279	176.6	176.8	545225	6.73064e+06	21.9248	Dacite B	CSBC	musc > chl (3-4)	76.11	11.05	3.11	3.21	0.29	1.48	1.89	0.17	0.02	0.07	<0.002	8	2.5	99.9	398	5	0.6	0.3	12.5	4.8	10.6	49.1	2	15.4	1.1	12.9	6	<8	0.9	161.8	35.8	38.5	73	7.91	29.1	5.7	1.16	5.63	0.91	6.06
S1700016227	SVASJ279	189.35	189.6	545219	6.73065e+06	12.8786	Dacite A	CSBC	Amph ± cord-phlog (3-4)	62.13	10.38	12.64	8.48	0.42	0.02	0.75	0.17	0.01	0.08	<0.002	8	4.7	99.83	102	<1	8.6	0.5	13.9	3.7	7.4	21.2	<1	2.7	0.6	10.4	4.1	<8	<0.5	129.2	23.2	28	52.7	5.73	20.6	4.1	0.39	3.8	0.62	3.95
S1700016228	SVASJ279	211.5	211.75	545209	6.73066e+06	-2.62263	Dacite B	CSBC	chl-phlog-cord (4-5)	68.01	9.59	5.99	10.02	0.34	0.06	0.62	0.19	0.02	0.05	<0.002	10	4.9	99.8	79	<1	3	2.3	11.1	4.2	7.3	21	1	10.5	0.6	11.9	4.6	<8	1.6	148.9	25.7	27.2	53.7	5.87	20.9	4.1	0.65	3.98	0.65	4.18
S1700016229	SVASJ279	226.3	226.6	545202	6.73067e+06	-12.8802	Dacite B	CSBC	musc-q-cord > chl-phlog (4-5)	76.9	11.73	2.6	2.82	0.03	0.17	2.68	0.16	0.01	0.02	<0.002	10	2.7	99.9	428	<1	0.7	0.6	15.9	5.5	9.8	43.7	3	9.6	0.9	13.5	4.9	<8	2.5	192.6	36.4	36.9	73.1	8.29	30.7	6.1	0.9	6.09	0.97	6.08
S1700016230	SVASJ279	232.55	232.8	545199	6.73067e+06	-17.1769	Marble/Skarn	Calc-silicate rock	q-act >> phlog (4-5) mag > py	83	4.74	7.04	2.73	0.16	<0.01	0.1	0.07	<0.01	0.06	0.002	3	2	99.95	4	<1	4.7	<0.1	7.5	2.6	5	2.3	<1	0.6	0.4	6.1	2.5	<8	<0.5	92.6	15	10.3	20.6	2.28	8.6	1.8	0.19	1.81	0.32	2.34
S1700016231	SVASJ279	236.25	236.65	545197	6.73067e+06	-19.7815	Marble/Skarn	Calc-silicate rock	q >> act (5) py > po	82.38	4.22	7.01	3.47	0.06	<0.01	0.1	0.05	<0.01	0.08	<0.002	3	2.5	99.92	13	<1	5.4	0.2	10.9	1.5	2	3.6	<1	1.2	0.2	3.9	2.3	<8	3.1	56.3	9.5	10.9	21.6	2.38	8.8	1.6	0.26	1.54	0.25	1.6
S1700016232	SVASJ279	241.8	242.35	545194	6.73068e+06	-23.6586	Marble/Skarn	Calc-silicate rock	trem > talc > serp (5) sph-gn-py-mag	53.94	1.71	8.33	20.38	10.72	0.12	0.02	0.02	<0.01	0.33	<0.002	<1	3	98.57	<1	<1	2.3	<0.1	2.8	0.4	0.6	<0.1	24	2.1	<0.1	0.7	0.5	<8	0.7	14.9	8.8	2	5.4	0.8	3.5	0.8	0.29	1.06	0.18	1.11
S1700016233	SVASJ279	252.15	252.45	545190	6.73068e+06	-30.6947	Rhyolite	CSBC	musc > chl-cord (5)	74.28	10.1	2.82	6.93	0.09	0.08	1.62	0.06	<0.01	0.05	0.003	4	3.8	99.85	268	2	1.3	1.5	13.9	3.2	8.3	46.4	3	8.2	1	13.4	4.8	<8	0.9	93.1	21.1	24.7	45.8	5.05	17	3.5	0.37	3.36	0.56	3.62
S1700016234	SVASJ279	255.8	256.1	545188	6.73068e+06	-33.2024	Rhyolite	QCGA	chl-cord-amph-grt ± cpy (4)	69.76	9.9	11	4.58	0.14	0.05	0.89	0.06	<0.01	0.08	<0.002	3	3.4	99.9	127	<1	2.9	0.7	9.4	3.3	6.5	24.1	2	1.8	0.8	12.4	4.5	<8	<0.5	94.3	21.5	21	43	4.75	17.2	3.2	0.16	3.25	0.56	3.6
S1700016235	SVASJ279	262.05	262.35	545185	6.73069e+06	-37.4894	Dacite A	Feldspar-phyric metavolcanic rock	q-ser > chl (3) grt	74.65	13.34	2.87	0.66	2.83	3.23	0.72	0.22	0.05	0.09	0.002	6	1.2	99.91	264	3	2.5	1.2	11.5	4.3	8.3	27.9	2	269.1	0.9	15.6	6.5	20	1	146.5	22.8	31.8	57.9	6.13	21	3.7	0.69	3.49	0.58	3.9
S1700016236	SVASJ279	269.65	269.95	545182	6.73069e+06	-42.691	Rhyolite	QCGA	chl-phlog-cord-gt-antho (4-5)	65.89	9.5	15.53	5.89	0.16	0.09	0.17	0.05	<0.01	0.06	<0.002	2	2.5	99.87	33	<1	9.8	0.8	12.5	2.8	6.1	5.5	1	5.3	0.6	10.8	4.8	<8	2.4	84.3	16.6	34.3	59.7	6.08	20.9	3.7	0.39	3.38	0.52	3.04
S1700016237	SVASJ279	275.25	275.55	545179	6.73069e+06	-46.5161	Rhyolite	CSBC	chl-musc-cord (4)	65.1	12.74	7.82	8.19	0.06	0.09	1.08	0.09	<0.01	0.08	<0.002	5	4.5	99.8	239	<1	8.8	1	10.6	4.5	10.2	29.9	5	3.4	1	17	6.7	<8	<0.5	127.2	24.3	30.5	57.6	6.17	21.6	3.6	0.23	3.58	0.64	3.79
S1700016238	SVASJ279	289.1	289.35	545173	6.7307e+06	-55.9072	Dacite A	CSBC	musc-phlog-cord (3-4)	71.66	13.1	3.19	5.28	0.06	0.14	2.59	0.22	0.04	0.06	<0.002	8	3.5	99.88	382	<1	2	1	13.2	4.2	6.9	48.4	2	6.3	0.6	10.7	4.1	11	1.4	140.9	18.9	28.3	53.3	5.53	20	3.4	0.57	3.38	0.52	3.29
S1700016239	SVASJ279	311.35	311.65	545162	6.73072e+06	-70.7664	Dacite A	CSBC	phlog-amph-gt-cord (4) po-py > sph	42.45	13.16	24.69	8.99	1.41	0.08	1.84	0.16	0.03	1.13	<0.002	8	3.7	97.65	177	<1	5.3	2.4	14.9	3.9	5.2	55.2	11	7.5	0.6	11.4	4.5	<8	0.6	144.6	16	27.9	51.8	5.48	19.1	3.5	1.37	3.39	0.52	3.02
S1700016240	SVASJ279	321.5	321.9	545158	6.73072e+06	-77.4602	Dacite A	Feldspar-phyric metavolcanic rock	musc-bt-q (1-2)	73.19	13.63	2.59	1.27	1.12	3.45	3.24	0.18	0.04	0.06	<0.002	7	1	99.92	1099	3	1.9	0.9	13.7	4.2	7.4	58.6	2	106.5	0.7	11.6	4.3	18	2.8	151.7	20	29.8	55.8	5.85	21.5	3.8	0.66	3.52	0.54	3.57
S1700016241	SVASJ279	344.2	344.5	545147	6.73074e+06	-92.2065	Dacite A	Feldspar-phyric metavolcanic rock	musc-bt-q (1-2)	74.57	13.38	2.44	1.32	1.37	3.4	1.96	0.18	0.03	0.04	<0.002	7	1.1	99.93	867	1	1.7	0.8	13.6	4.3	7.2	56.3	2	127.7	0.6	12	4	9	2	161.7	18.5	29.3	55.4	5.83	19.8	3.8	0.68	3.38	0.54	3.33
S1700016242	SVASJ279	374.35	374.65	545134	6.73075e+06	-111.714	Dacite A	Feldspar-phyric metavolcanic rock	fsp (1) Least altered	74.93	12.12	3.07	0.52	1.36	3.1	3.5	0.19	0.03	0.1	<0.002	9	0.9	99.94	969	1	1.6	0.4	12.2	4.3	7.9	70.2	2	93.1	0.7	11.7	4.1	17	0.6	158.9	23.4	30.7	57.5	6.29	21.4	4.2	0.73	3.87	0.61	3.99
S1700016243	SVASJ279	406.2	406.5	545120	6.73077e+06	-132.048	Dacite A	Feldspar-phyric metavolcanic rock	musc >> chl (1)	73.92	12.96	3.16	1.45	0.99	3.46	2.2	0.2	0.03	0.09	<0.002	10	1.4	99.92	870	2	2.3	0.8	15.2	4.2	8.9	40.3	2	107.2	0.9	11.1	3.5	<8	2	160.4	24.2	29.9	56.2	6.37	22.8	4.2	0.78	3.85	0.61	3.75
S1700016244	SVASJ279	445	445.3	545104	6.7308e+06	-155.909	Dacite A	Feldspar-phyric metavolcanic rock	q-bt (1-2)	75.5	12.39	3.05	0.53	1.04	4.28	2.23	0.21	0.04	0.07	<0.002	10	0.5	99.94	622	3	1.6	2.9	12	4.5	8.3	42.3	2	136.7	0.8	10.9	4.2	10	0.9	155.3	22.4	30.4	59.1	6.33	23.1	4.3	0.73	4.03	0.65	3.88
S1700016248	SVASJ279	70.85	71.15	545271	6.73059e+06	100.585	Dacite C	Feldspar-phyric metavolcanic rock	chl-phlog >> cord (3)	68.13	13.43	4.63	3.49	2.05	2.73	2.77	0.39	0.12	0.09	<0.002	12	1.9	99.89	1265	1	8.1	1.8	12.6	3.3	6	57.8	1	125.7	0.7	11.9	4.7	50	0.5	107.8	18.5	31.2	55.7	5.96	21.5	3.7	0.64	3.32	0.5	3.12
S1800011536	SVASJ290	144.3	144.6	545258	6.73042e+06	44.2153	Dacite A	SC		77.6264	11.8	2.39	1.64	0.29	0.21	3.34	0.17	0.02	0.03	<0.002	4	2.2	99.92	665	2	2.4	0.7	12.5	3.3	7.6	69.7	3	9.2	0.7	11.7	4.3	9	4.5	129.1	15.4	28	52.6	5.12	18.2	3.1	0.46	2.64	0.44	2.54
S1800011537	SVASJ290	206.6	206.95	545230	6.73045e+06	-4.53301	Dacite A	CSBC	int. ser-cord-phlog-serp alt.	76.9011	11.49	2.05	3.62	0.03	0.18	2.88	0.14	0.02	0.01	<0.002	3	2.4	99.9	611	<1	2.1	1.1	11.8	2.9	6.7	48.7	3	5.1	0.7	13.3	5.1	9	2.3	99.7	13.6	46.2	80.2	7.4	23.1	3.8	0.53	3.16	0.44	2.52
S1800011538	SVASJ290	240.2	240.5	545215	6.73047e+06	-30.3257	Mafic	CSBC	str. Chl-phlog-cord-antho alt.	53.7816	14.82	9.21	14.49	0.32	0.21	1.67	0.67	0.17	0.09	<0.002	25	3.9	99.7	158	3	17.5	1.2	16.3	2.5	7	28	4	6.6	0.5	8.2	3.4	96	13.8	87.3	41.3	26.6	49.8	5.14	19.2	3.7	0.84	4.2	0.76	5.08
S1800011539	SVASJ290	296.6	296.85	545189	6.73049e+06	-72.703	Dacite A	Biotite schist	int. Phlog alt.	72.326	12.17	4.17	4.74	0.57	0.96	1.84	0.24	0.04	0.04	<0.002	15	2.5	99.86	1010	<1	0.5	2.3	15.8	4	8.2	44.5	3	43.5	0.6	8.9	3.4	<8	0.8	145.5	29.5	30.8	61.9	6.74	24.3	5.3	1.28	4.82	0.84	5.16
S1800011540	SVASJ290	412.6	412.9	545134	6.73055e+06	-155.409	Dacite B	SC	ser-cord alt.	75.6543	12.66	2.25	2.75	0.07	0.18	3.09	0.25	0.03	0.02	<0.002	9	2.8	99.89	677	3	1.6	1.8	15.2	5.2	12.1	64.2	3	8	0.9	11.2	4.4	<8	4.4	188.1	40.5	36.1	75.4	8.11	32.6	6.4	0.69	6.27	1.05	7.07
S1800011541	SVASJ290	432.05	432.55	545125	6.73056e+06	-168.671	Marble/Skarn	Calc-silicate rock	trem-serp-talc alt.	55.0933	4.57	2.13	24.11	7.58	0.05	0.01	0.06	0.02	0.57	<0.002	5	4.8	99.49	2	3	2.3	<0.1	5.8	1.7	1	<0.1	5	1.4	<0.1	3.6	1	<8	0.7	69	24.4	10	19.4	2.53	11.2	3.2	0.83	3.53	0.68	4.42
S1800011542	SVASJ290	448.85	449.15	545117	6.73057e+06	-179.92	Dacite B	CSBC	w. str. cg ser-phlog-serp>cord alt.	74.8668	12.39	2.04	4.02	0.1	0.14	2.47	0.16	0.02	0.02	<0.002	10	3.5	99.88	318	2	1	2.8	15.5	5.6	10.9	44.8	3	12.3	1	13.5	5.8	<8	1.6	200.8	32.5	37.7	70	7.18	25.2	4.8	0.99	4.7	0.83	5.31
S1800011543	SVASJ290	493.7	494	545095	6.7306e+06	-209.823	Rhyolite	QCGA	Grt-antho rich rock skarn?	70.1691	9.02	15.59	3.33	0.05	0.3	0.28	0.05	<0.01	0.06	<0.002	4	1	99.9	52	<1	12.2	1.1	11.3	2.6	5.3	8.6	2	3.3	0.5	11.2	5	<8	0.6	84.9	19.4	30.3	61.2	5.9	19.6	3.7	0.11	3.25	0.55	3.57
S1800011544	SVASJ290	525.4	525.7	545079	6.73062e+06	-230.64	Dacite A	SC	str. Ser-phlog+Si alt.	70.249	13.5	2.34	5.57	0.34	1.07	3.68	0.23	0.04	0.05	<0.002	9	2.5	99.86	1217	<1	1.6	1.6	14	3.6	9	81.2	3	38.9	0.7	11.7	3.9	8	3.2	140.5	20.8	29.2	54.2	5.94	21.5	3.8	0.57	3.52	0.58	3.41
S1800011545	SVASJ290	600.95	601.25	545041	6.73066e+06	-278.631	Dacite A	Feldspar-phyric metavolcanic rock	weak. Phlog alt or primary bt?	72.259	13.39	2.7	0.74	1.11	2.42	5.88	0.23	0.06	0.08	<0.002	5	0.8	99.93	1639	2	2.6	0.7	11	3.9	8.3	65.8	2	107.8	0.9	19.6	8.6	21	0.8	130.6	17.6	33.2	58.2	5.61	18.2	3.3	0.53	2.76	0.46	2.93
S1800011546	SVASJ288	93.55	93.95	545450	6.73042e+06	84.7237	Dacite A	SC	str. Ser-phlog alt.	76.3835	12	3.32	1.6	0.66	2.29	1.91	0.15	0.03	0.03	<0.002	4	1.4	99.94	775	<1	2.3	0.6	11.2	3.2	7.7	37.2	3	32.5	0.7	11.7	4.6	12	3.4	121.7	18	30.6	56.2	5.84	19.5	3.6	0.4	3.1	0.48	3.07
S1800011547	SVASJ288	243.05	243.35	545399	6.7305e+06	-32.6026	Dacite A	SC	qtz-porphyry	74.4333	12.67	2.54	3.65	0.12	0.17	3.11	0.18	0.03	0.03	<0.002	5	2.8	99.9	495	2	2.2	0.6	10	3.6	8	59.9	2	6.1	0.7	12	5.2	14	5.4	133.7	17.1	31.8	59.7	5.79	18.9	3.5	0.29	3.19	0.49	3.01
S1800011548	SVASJ288	348	348.3	545364	6.73056e+06	-112.3	Dacite A	Feldspar-phyric metavolcanic rock	mag-rich	73.3629	13.1	3.24	0.86	1.56	4.38	1.44	0.24	0.05	0.06	0.003	11	1.5	99.91	669	2	3.6	1	10.4	4.4	8.2	41.9	1	165.7	0.6	13.7	5.1	24	0.7	153.5	25.3	36.4	67.3	7.24	25.8	4.8	0.89	4.25	0.68	4.24
S1800011549	SVASJ288	408.35	408.65	545344	6.7306e+06	-157.421	Dacite C	Biotite schist	int. Bt>cord-chl>grt	61.5163	15.96	6.73	3.91	2.85	2.72	2.56	0.52	0.13	0.16	0.01	15	2.4	99.82	1559	2	11.7	1.6	18.7	4.7	11.9	67.1	3	149.8	1.2	16.3	6.7	147	1.1	153.3	33.3	49.3	94.6	10.47	37.3	6.8	1.35	6.11	0.94	5.43
S1800011550	SVASJ288	431.9	432.25	545337	6.73061e+06	-174.814	Dacite B	CSBC	str. Ser-cord>chl alt.	75.3047	10.58	4.67	3.7	0.14	0.1	2.21	0.16	0.03	0.06	<0.002	7	2.8	99.89	652	1	4	1.2	11	4.9	8.3	50.4	3	4.4	0.8	11.8	4.9	17	3.9	171.6	33.4	26.6	57.8	6.15	23.2	4.4	0.36	4.39	0.74	4.88
S1800011551	SVASJ288	499.7	500	545315	6.73065e+06	-224.273	Mafic	Metamafite	amph-rich	56.3904	15.13	12	3.51	5.03	4.85	0.42	1.03	0.38	0.25	<0.002	33	0.7	99.86	323	<1	20.1	0.2	14.8	2.3	5.4	6.6	1	132.3	0.4	4.9	2	159	0.8	85.4	19	19.4	42.3	4.95	18.7	4.2	1.07	3.75	0.57	3.37
S1800011552	SVASJ288	565.4	565.7	545294	6.73069e+06	-270.881	Mafic	CSBC	int. Ser-cord-chl alt.	54.7202	17.6	9.37	8.92	2.16	1.86	0.88	0.84	0.21	0.16	<0.002	31	2.8	99.77	106	<1	20.9	1.4	17	3.1	7.2	17.6	<1	102.1	0.5	6.8	2.5	140	<0.5	111.8	24.3	22.8	46.6	5.11	20.2	4.2	1.06	4.11	0.65	4.24
S1800011553	SVASJ288	613.1	613.4	545278	6.73072e+06	-303.15	Dacite A	CSBC	ser-chl-cord-phlog alt.	66.1339	12.3	8.32	8.34	0.14	0.14	1.19	0.28	0.04	0.1	0.003	16	2.6	99.8	303	1	7.8	1	13.1	3.5	8.1	30.2	2	7.6	0.7	7.9	3.1	42	<0.5	133.8	23.5	31	61	6.66	23.9	4.8	0.78	4.22	0.66	4.24
S1800011554	SVASJ288	640.5	641.1	545270	6.73074e+06	-321.285	Marble/Skarn	Dolomite marble	ophicalcite w. sph+mag	7.89704	2.11	1.85	19.98	26.71	<0.01	<0.01	0.06	0.03	1.99	<0.002	2	37.6	99.12	2	2	2.4	<0.1	1.4	0.7	1.8	<0.1	<1	29.7	0.2	2.3	2.7	9	4.8	25.4	6.9	7.1	14.4	1.57	6.2	1.3	0.27	1.25	0.17	1.08
S1800011555	SVASJ288	642.2	642.8	545269	6.73074e+06	-322.398	Dacite B	Calc-silicate rock	si-trem-chl-phlog alt.	59.2672	10.26	3.18	16.32	2.63	0.23	0.89	0.17	0.03	0.3	<0.002	9	5.4	99.33	80	2	1.5	4	11.7	4.3	7.6	33.5	2	28.2	0.6	10.2	5.4	<8	1.6	156.6	39.7	30.5	60.6	6.5	25.9	5	0.92	5.25	0.91	5.91
S1800011556	SVASJ288	660.8	661.5	545263	6.73076e+06	-334.509	Marble/Skarn	Calc-silicate rock	mag-rich trem-chl alt.	50.4171	0.84	20.88	21.46	0.83	0.12	<0.01	0.02	0.01	0.09	<0.002	<1	3.2	98.95	2	<1	8.5	<0.1	2.9	0.2	0.9	0.3	6	1.8	<0.1	0.7	4.2	17	0.8	6.7	2.4	2.7	4.8	0.49	1.7	0.4	0.08	0.41	0.07	0.41
S1800011558	SVASJ281	222.3	223.15	545265	6.73059e+06	-7.58085	Marble/Skarn	Calc-silicate rock	diopside alt	42.6234	24.81	7.03	1	15.37	0.94	3.06	0.3	0.42	0.13	<0.002	21	3.8	99.76	466	1	11.7	0.5	32.8	4.7	10.4	62.8	5	623.4	0.8	10.9	7.5	43	258.3	166.1	46.5	47.2	90.4	10.09	38	7.7	2.22	7.45	1.27	8.09
S1800011559	SVASJ281	291	291.4	545234	6.73063e+06	-56.4834	Mafic	SC	mod. Chl-ser alt.	54.5278	14.89	12.56	6.9	3.77	1.88	1.24	0.86	0.2	0.13	<0.002	34	2.6	99.8	389	2	26.1	1.8	15.4	1.6	3.6	29.4	<1	123.1	0.3	4.4	1.6	259	0.7	65.5	17.6	15.6	29.8	3.46	12.5	3	0.8	2.93	0.47	3.23
S1800011560	SVASJ281	366.05	366.45	545201	6.73067e+06	-108.978	Dacite B	QCGA	w. mag+py	53.5281	6.1	7.64	24.68	0.21	0.11	0.47	0.1	0.02	0.08	<0.002	5	5.8	99.35	45	<1	4.4	0.4	7.5	2.4	4	11.5	1	2.1	0.3	6.1	2	<8	0.5	86.6	14.9	20.8	40.8	4.27	16	3.2	0.27	2.77	0.41	2.46
S1800011561	SVASJ281	406.4	406.8	545185	6.73069e+06	-136.503	Rhyolite	QCGA	int. Chl alt.	58.2566	11.98	14.16	9.2	0.13	0.02	0.28	0.07	<0.01	0.08	<0.002	4	5.4	99.8	48	<1	11.5	0.6	19	3.5	7.3	7.8	2	2.5	0.8	13.2	5.3	<8	<0.5	102.1	23.3	28.6	53.8	5.69	19.3	3.8	0.28	3.74	0.62	3.89
S1800011562	SVASJ269	32.6	32.9	545213	6.73066e+06	112.132	Dacite A	SC	ser-chl schist	70.4578	12.96	4.26	4.54	0.41	0.8	2.56	0.27	0.05	0.06	<0.002	16	3.3	99.86	515	2	0.8	0.9	15.9	4.1	9.3	50.3	2	27.1	0.8	9.5	2.7	<8	1.2	152.8	31.3	34.3	68.4	7.32	28.8	5.5	1.32	5.39	0.85	5.21
S1800011563	SVASJ269	48.3	48.7	545205	6.73067e+06	100.296	Mafic	Biotite schist	int. Phlog-chl-cord alt.	64.2561	13.5	8.42	6.12	0.25	0.09	2.39	0.53	0.13	0.05	<0.002	22	3.9	99.83	390	<1	15	1.6	14.8	2.9	5.5	56.6	1	5.4	0.5	7.3	2.8	140	0.7	100.9	21.1	22.9	45.4	5.01	18.8	4	0.61	3.65	0.61	3.83
S1800011564	SVASJ269	65.75	66.05	545195	6.73067e+06	87.5931	Dacite B	CSBC	ser-chl-cord	83.4805	7.14	4.2	1.6	0.07	0.04	1.5	0.08	0.02	0.03	<0.002	5	1.7	99.93	285	<1	2.5	1.5	9.2	2.8	5.9	33.4	3	6.3	0.5	7.2	3.1	<8	2.9	97.9	25.8	43.7	89.9	9.61	37.4	6.9	0.54	6.07	0.9	5.24
S1800011565	SVASJ269	83.8	84.55	545186	6.73068e+06	74.2776	Marble/Skarn	Dolomite marble	serp. + yellow sph/Fe	5.27642	1.4	1.04	20.04	29.16	<0.01	<0.01	0.04	0.01	0.8	<0.002	2	41.5	99.63	3	<1	0.3	<0.1	0.9	0.6	1.3	<0.1	1	35.1	0.1	1.6	2.2	8	18.4	22	4.2	4.9	10.7	1.2	4.7	0.8	0.4	0.73	0.11	0.71
S1800011566	SVASJ269	95.75	96.1	545179	6.73069e+06	65.6966	Rhyolite	QCGA	chl alt. More mafic comp?	74.9553	7.18	9.49	4.68	0.26	0.09	0.38	0.04	<0.01	0.07	0.002	3	2.6	99.89	130	<1	7.1	0.8	10	2.1	4.7	10.4	<1	20	0.5	8.4	4.2	<8	1.6	66	18.4	11.3	20.3	2.28	8.5	2.2	0.11	2.63	0.51	3.23
S1800011567	SVASJ265	74.2	74.5	545249	6.73063e+06	92.5761	Dacite A	CSBC	ser-cord-chl	69.8291	12.39	4.41	5.07	0.73	2.11	1.73	0.26	0.05	0.05	<0.002	15	3	99.86	560	3	1.8	0.8	16.2	4	8.7	38.7	2	60.6	0.7	9.1	4.5	<8	<0.5	143.2	30.9	28.6	59.6	6.47	25.1	4.7	1.23	4.47	0.7	4.76
S1800011568	SVASJ265	121.45	121.8	545226	6.73065e+06	56.9786	Dacite A	CSBC	Ser-chl>phlog alt.	73.0219	12.44	3.72	4.28	0.04	0.14	2.62	0.19	0.04	0.04	<0.002	9	3.1	99.87	684	2	1.1	0.4	15.1	4.5	11.2	60.1	3	4.5	0.9	12.5	5.4	<8	1.7	156.3	30.1	49.7	95.7	9.98	37.3	7.1	1.13	6.21	0.96	5.61
S1800011569	SVASJ265	149.7	149.95	545211	6.73067e+06	36.7281	Dacite B	CSBC	str. Cord-chl-ser-phlog alt. Trem?	65.1285	13.72	3.87	9.76	0.21	0.21	1.48	0.2	0.02	0.07	<0.002	8	4.8	99.75	515	<1	1.1	1.7	15.2	5.8	12.1	42.7	5	11.6	0.9	17.4	7.5	<8	4.7	207.3	35.9	39	83	8.04	29.5	5.5	0.74	5.1	0.87	5.43
S1800011570	SVASJ265	173.65	174.65	545198	6.73068e+06	19.7481	Marble/Skarn	Dolomite marble	minor ophical.+ sulphides	2.33489	0.44	1.15	18.75	30.85	<0.01	<0.01	0.01	<0.01	1.24	<0.002	<1	41.6	98.18	2	<1	1.1	<0.1	<0.5	<0.1	<0.1	0.2	<1	34	<0.1	0.5	0.7	<8	8.1	6	4.7	3.7	6.1	0.62	2.8	0.4	0.33	0.59	0.05	0.47
S1800011571	SVASJ265	178.6	179.5	545195	6.73068e+06	16.3442	Anomalous sample	Calc-silicate rock	Blue chl-mag rich rock unknown comp.	23.7962	15.54	27.29	22.16	0.26	<0.01	<0.01	0.03	0.01	0.38	<0.002	4	9.3	99.38	3	<1	15.3	<0.1	53.6	0.5	0.2	0.1	7	0.7	<0.1	1.2	8.9	<8	1.8	22.1	31.6	17.4	34.3	3.75	14.8	3.4	0.72	3.95	0.58	3.15
S1800011572	SVASJ265	187.3	187.6	545190	6.73068e+06	10.5091	Rhyolite	CSBC	ser-cord-chl	67.5859	14	7.52	4.15	0.11	0.12	2.57	0.09	0.01	0.08	<0.002	5	3.5	99.88	545	3	5	2.3	13.7	4.3	9.6	63.9	5	9.3	1	18.1	6.4	<8	0.9	137.1	27.3	34.6	72.2	7.27	26.4	4.8	0.41	4.32	0.68	4.51
S1800011573	SVASJ265	229.3	229.7	545168	6.7307e+06	-18.7013	Dacite A	SC	ser-cord + phlog? Alt.	71.6661	13.45	2.87	4.75	0.07	0.16	2.84	0.22	0.06	0.05	<0.002	8	3.5	99.82	355	5	2.4	1	13.1	3.8	8	46.5	2	6.8	0.6	10	3.8	<8	1.9	136.2	20	27.7	55.6	5.56	19.7	3.6	0.65	3.45	0.51	3.22
S1800011574	SVASJ265	247.6	248	545158	6.73071e+06	-31.4135	Dacite A	CSBC	phlog-amph-qtz alt.	57.2668	12.69	19.84	3.43	1.06	0.32	0.45	0.18	0.02	0.11	<0.002	7	2.8	99.07	68	3	4.1	0.5	11.7	3.7	8.5	15.5	11	27.3	0.7	10.1	4.1	<8	8.5	149.8	17.2	31.5	59.8	6.19	21.3	3.9	1.07	3.48	0.52	3.31
S1800011575	SVASJ265	316.2	316.55	545121	6.73075e+06	-79.0497	Dacite A	Feldspar-phyric metavolcanic rock	least altered. bt wisps -> pumice?	74.8873	12.99	2.26	0.36	1.54	3.38	3.66	0.2	0.04	0.04	<0.002	10	0.4	99.93	820	1	1.3	0.3	13.1	4.5	8.8	62.6	2	111.4	0.7	11.1	4.7	<8	0.8	161.7	24.9	31.2	59.6	6.33	23.4	4.3	0.81	3.81	0.6	4
		=	Least-altered sample
[truncated: 21 more columns]

## Sheet: Volatile free
Sample	Hole ID	From	To	X	Y	Z	Chemoclassification	Rock type	Logged alteration	SiO2_pct	Al2O3_pct	Fe2O3_pct	MgO_pct	CaO_pct	Na2O_pct	K2O_pct	TiO2_pct	P2O5_pct	MnO_pct	Cr2O3_pct	Sc_ppm	LOI_pct	Sum_pct	Ba_ppm	Be_ppm	Co_ppm	Cs_ppm	Ga_ppm	Hf_ppm	Nb_ppm	Rb_ppm	Sn_ppm	Sr_ppm	Ta_ppm	Th_ppm	U_ppm	V_ppm	W_ppm	Zr_ppm	Y_ppm	La_ppm	Ce_ppm	Pr_ppm	Nd_ppm	Sm_ppm	Eu_ppm	Gd_ppm	Tb_ppm	Dy_ppm
S1800011571	SVASJ265	178.6	179.5	545195	6.73068e+06	16.3442	Anomalous sample	Calc-silicate rock	Blue chl-mag rich rock unknown comp.	26.4168	17.2547	30.2977	24.5976	0.286659	<0.01	<0.01	0.0330761	0.0110254	0.418964	<0.002	4.41014	9.3	99.38	3.30761	<1	16.9791	<0.1	59.5369	0.551268	0.220507	0.110254	7.71775	0.771775	<0.1	1.32304	9.92282	<8	1.98456	24.5865	35.0606	19.2944	38.0375	4.16759	16.4278	3.75965	0.793826	4.38809	0.639471	3.49504
S1700016235	SVASJ279	262.05	262.35	545185	6.73069e+06	-37.4894	Dacite A	Feldspar-phyric metavolcanic rock	q-ser > chl (3) grt	75.6256	13.5143	2.90751	0.668625	2.86698	3.27221	0.729409	0.222875	0.0506534	0.0911762	0.00202614	6.07841	1.2	99.91	267.45	3.03921	2.53267	1.21568	11.6503	4.35619	8.40847	28.2646	2.02614	272.617	0.911762	15.8039	6.58495	20.2614	1.01307	148.415	23.098	32.2156	58.6567	6.21011	21.2744	3.77875	0.699017	3.53561	0.58758	3.95097
S1700016220	SVASJ279	93.35	93.6	545261	6.7306e+06	83.5031	Dacite A	Feldspar-phyric metavolcanic rock	Chl (1)	74.8048	13.3631	3.35598	0.628612	1.80472	4.08598	1.54111	0.233195	0.0506945	0.0709723	<0.002	11.1528	1.3	99.93	850.654	1.01389	3.14306	0.608334	12.8764	4.76528	8.51668	37.007	2.02778	157.457	0.811112	13.5861	6.18473	14.1945	<0.5	155.328	25.4486	34.675	66.714	7.0364	25.1445	4.59292	0.841529	4.2482	0.709723	4.35973
S1800011548	SVASJ288	348	348.3	545364	6.73056e+06	-112.3	Dacite A	Feldspar-phyric metavolcanic rock	mag-rich	74.5482	13.3096	3.28934	0.873096	1.58376	4.4467	1.46193	0.243655	0.0507614	0.0609137	0.00304569	11.1675	1.5	99.91	680.203	2.03046	3.65482	1.01523	10.5584	4.46701	8.32487	42.5381	1.01523	168.426	0.609137	13.9086	5.17766	24.3655	0.71066	155.939	25.6853	36.9543	68.4264	7.36041	26.1929	4.84264	0.903553	4.31472	0.690355	4.30457
S1700016223	SVASJ279	115.7	115.9	545252	6.73061e+06	66.6453	Dacite A	Feldspar-phyric metavolcanic rock	Least altered	75.3523	12.5013	2.64625	1.95681	1.57153	4.52195	0.851668	0.263611	0.0506945	0.0506945	<0.002	8.11112	1.3	99.93	1758.09	<1	2.12917	0.101389	11.1528	4.05556	7.80696	10.8486	2.02778	112.035	0.709723	14.6	6.4889	21.2917	<0.5	139.309	20.6834	30.0112	55.6626	5.93126	21.2917	3.7007	0.679306	3.37625	0.567779	3.4675
S1700016244	SVASJ279	445	445.3	545104	6.7308e+06	-155.909	Dacite A	Feldspar-phyric metavolcanic rock	q-bt (1-2)	75.9252	12.4598	3.06718	0.532985	1.04586	4.3041	2.24256	0.211183	0.0402253	0.0703942	<0.002	10.0563	0.5	99.94	625.503	3.01689	1.60901	2.91633	12.0676	4.52534	8.34674	42.5382	2.01126	137.47	0.804505	10.9614	4.22365	10.0563	0.905068	156.175	22.5261	30.5712	59.4328	6.36565	23.2301	4.34433	0.734111	4.0527	0.65366	3.90185
S1700016241	SVASJ279	344.2	344.5	545147	6.73074e+06	-92.2065	Dacite A	Feldspar-phyric metavolcanic rock	musc-bt-q (1-2)	75.4528	13.5384	2.46889	1.33563	1.38622	3.44025	1.9832	0.182131	0.0303552	0.0404735	<0.002	7.08287	1.1	99.93	877.264	1.01184	1.72013	0.809471	13.761	4.35091	7.28524	56.9665	2.02368	129.212	0.607103	12.1421	4.04735	9.10655	2.02368	163.614	18.719	29.6469	56.0559	5.89902	20.0344	3.84499	0.68805	3.42001	0.546393	3.36942
S1700016221	SVASJ279	104.75	104.95	545256	6.7306e+06	74.9075	Dacite A	Feldspar-phyric metavolcanic rock	chl >> cord (1-2)	73.064	12.4783	4.62198	2.38751	2.88746	2.63238	1.45903	0.265279	0.0408122	0.0816243	<0.002	15.3046	1.9	99.91	729.517	<1	0.816243	0.918274	16.0188	3.97919	7.44822	32.8538	2.04061	138.047	0.612182	8.87665	3.46903	<8	<0.5	143.863	30.099	28.7726	58.2594	6.45852	24.5893	4.95868	1.09173	4.6832	0.765228	5.18314
S1800011575	SVASJ265	316.2	316.55	545121	6.73075e+06	-79.0497	Dacite A	Feldspar-phyric metavolcanic rock	least altered. bt wisps -> pumice?	75.241	13.0522	2.26908	0.361446	1.54618	3.39357	3.6747	0.200803	0.0401606	0.0401606	<0.002	10.0402	0.4	99.93	824.297	1.00402	1.30522	0.301205	13.1526	4.51807	8.83534	62.8514	2.00803	111.948	0.702811	11.1446	4.71888	<8	0.803213	162.45	25	31.3253	59.8394	6.35542	23.494	4.29719	0.813253	3.8253	0.60241	4.01606
S1700016243	SVASJ279	406.2	406.5	545120	6.73077e+06	-132.048	Dacite A	Feldspar-phyric metavolcanic rock	musc >> chl (1)	75.0305	13.1547	3.20747	1.47178	1.00487	3.51198	2.23305	0.203004	0.0304507	0.091352	<0.002	10.1502	1.4	99.92	883.069	2.03004	2.33455	0.812018	15.4283	4.26309	9.0337	40.9054	2.03004	108.81	0.91352	11.2667	3.55258	<8	2.03004	162.81	24.5635	30.3492	57.0443	6.46569	23.1425	4.21234	0.791717	3.90784	0.619164	3.80633
S1700016242	SVASJ279	374.35	374.65	545134	6.73075e+06	-111.714	Dacite A	Feldspar-phyric metavolcanic rock	fsp (1) Least altered	75.6563	12.2375	3.09976	0.52504	1.37318	3.13005	3.53393	0.191842	0.0302908	0.100969	<0.002	9.08724	0.9	99.94	978.393	1.00969	1.61551	0.403877	12.3183	4.34168	7.97658	70.8805	2.01939	94.0024	0.706785	11.8134	4.13974	17.1648	0.605816	160.44	23.6268	30.9976	58.0574	6.35097	21.6074	4.19023	0.737076	3.90751	0.615913	4.02868
S1600040368	SVASJ280	234.1	234.35	545370	6.73057e+06	5.02607	Dacite A	Metamafite		74.7833	11.3286	6.10788	2.27389	1.24401	2.40644	1.22362	0.336494	0.101968	0.101968	0.00203936	12.2362	1.8	99.87	691.343	2.03936	7.54563	1.22362	14.8873	4.48659	11.4204	38.5439	5.0984	89.9358	0.815744	11.9303	4.28266	107.066	1.63149	156.827	26.8176	41.9088	77.2917	9.15672	34.5671	6.373	1.31539	5.71021	0.79535	4.7823
S1700016240	SVASJ279	321.5	321.9	545158	6.73072e+06	-77.4602	Dacite A	Feldspar-phyric metavolcanic rock	musc-bt-q (1-2)	73.9891	13.7788	2.61828	1.28387	1.13223	3.48767	3.27537	0.181965	0.0404367	0.0606551	<0.002	7.07643	1	99.92	1111	3.03275	1.92074	0.909826	13.8496	4.24586	7.48079	59.2398	2.02184	107.663	0.707643	11.7266	4.34695	18.1965	2.83057	153.356	20.2184	30.1254	56.4092	5.91387	21.7347	3.83138	0.667206	3.55843	0.545896	3.60898
S1700016225	SVASJ279	157	157.3	545233	6.73063e+06	35.9762	Dacite A	SC	Musc-chl (1)	72.0348	12.3926	5.18405	3.54806	2.38241	2.12679	1.76892	0.286299	0.0613497	0.132924	<0.002	16.3599	2.1	99.9	592.025	1.02249	2.04499	1.43149	14.3149	3.88548	6.95297	46.0123	1.02249	70.0409	0.511247	8.28221	3.27198	<8	<0.5	131.186	26.6871	28.2209	53.5787	6.16564	23.0061	4.45808	1.03272	4.33538	0.715746	4.5501
S1800011546	SVASJ288	93.55	93.95	545450	6.73042e+06	84.7237	Dacite A	SC	str. Ser-phlog alt.	77.5152	12.1805	3.36714	1.62272	0.669371	2.32252	1.93712	0.15213	0.030426	0.030426	<0.002	4.0568	1.4	99.94	786.004	<1	2.33266	0.608519	11.359	3.24544	7.80933	37.7282	3.0426	32.9615	0.709939	11.8661	4.66531	12.1704	3.44828	123.529	18.2556	31.0345	56.998	5.92292	19.7769	3.65112	0.40568	3.14402	0.486815	3.11359
S1800011545	SVASJ290	600.95	601.25	545041	6.73066e+06	-278.631	Dacite A	Feldspar-phyric metavolcanic rock	weak. Phlog alt or primary bt?	72.8931	13.5081	2.72177	0.745968	1.11895	2.43952	5.92742	0.231855	0.0604839	0.0806452	<0.002	5.04032	0.8	99.93	1653.23	2.01613	2.62097	0.705645	11.0887	3.93145	8.36694	66.3306	2.01613	108.77	0.907258	19.7581	8.66935	21.1694	0.806452	131.754	17.7419	33.4677	58.6694	5.65524	18.3468	3.34677	0.534274	2.78226	0.46371	2.95363
S1800011567	SVASJ265	74.2	74.5	545249	6.73063e+06	92.5761	Dacite A	CSBC	ser-cord-chl	72.0928	12.7938	4.5567	5.23711	0.752577	2.17526	1.78351	0.268041	0.0515464	0.0515464	<0.002	15.4639	3	99.86	578.351	3.09278	1.85567	0.824742	16.701	4.12371	8.96907	40	2.06186	62.5773	0.721649	9.38144	4.63918	<8	<0.5	147.835	31.8557	29.4845	61.5464	6.68041	25.8763	4.85567	1.26804	4.61856	0.721649	4.91753
S1800011574	SVASJ265	247.6	248	545158	6.73071e+06	-31.4135	Dacite A	CSBC	phlog-amph-qtz alt.	59.4856	13.179	20.607	3.55967	1.10082	0.329218	0.462963	0.185185	0.0205761	0.113169	<0.002	7.20165	2.8	99.07	70.9877	3.08642	4.21811	0.514403	12.1399	3.80658	8.84774	16.0494	11.3169	28.3951	0.720165	10.4938	4.21811	<8	8.84774	155.556	17.9012	32.716	62.1399	6.43004	22.1193	4.0535	1.11111	3.61111	0.545267	3.43621
S1600040371	SVASJ280	210.9	211.1	545382	6.73055e+06	19.4335	Dacite A	SC		78.2928	12.0607	3.26984	0.998268	0.234287	0.926963	3.67729	0.162983	0.0509321	0.0305592	<0.002	5.09321	1.7	99.87	2355.1	<1	3.25965	0.509321	11.7144	3.46338	7.43608	83.4267	3.05592	36.2636	0.713049	13.9554	4.88948	26.4847	2.44474	123.969	20.4747	33.2077	57.9607	6.26464	20.271	3.53468	0.753794	3.32077	0.488948	3.22909
S1800011539	SVASJ290	296.6	296.85	545189	6.73049e+06	-72.703	Dacite A	Biotite schist	int. Phlog alt.	74.2872	12.5026	4.28718	4.87179	0.584615	0.984615	1.88718	0.246154	0.0410256	0.0410256	<0.002	15.3846	2.5	99.86	1036.92	<1	0.512821	2.35897	16.2051	4.10256	8.41026	45.7436	3.07692	44.7179	0.615385	9.12821	3.48718	<8	0.820513	149.436	30.2564	31.5897	63.5897	6.92308	24.9231	5.41538	1.31282	4.95385	0.861538	5.30256
S1600040382	SVASJ281	165.2	165.4	545291	6.73056e+06	34.0959	Dacite A	SC	Coherent?	78.6558	10.9136	2.8363	3.9667	0.31857	0.955709	2.01418	0.184976	0.0513822	0.0411057	0.00205529	6.16586	2.6	99.91	554.928	<1	5.03545	2.36358	10.482	2.67187	6.37139	50.0462	1.02764	20.3473	0.616586	11.6124	3.90505	25.6911	0.513822	86.9386	17.5727	36.2758	63.4056	6.67968	21.8888	3.52482	0.565204	3.10348	0.452163	2.86713
S1800011562	SVASJ269	32.6	32.9	545213	6.73066e+06	112.132	Dacite A	SC	ser-chl schist	72.9679	13.423	4.41572	4.70527	0.423992	0.827301	2.64736	0.279214	0.0517063	0.0620476	<0.002	16.546	3.3	99.86	533.609	2.06825	0.827301	0.930714	16.4426	4.23992	9.61737	52.12	2.06825	28.0248	0.827301	9.8242	2.79214	<8	1.24095	158.221	32.3681	35.4705	70.8376	7.58014	29.7828	5.72906	1.36505	5.58428	0.879007	5.39814
S1800011544	SVASJ290	525.4	525.7	545079	6.73062e+06	-230.64	Dacite A	SC	str. Ser-phlog+Si alt.	72.1538	13.8667	2.4	5.72308	0.348718	1.09744	3.78462	0.235897	0.0410256	0.0512821	<0.002	9.23077	2.5	99.86	1250.26	<1	1.64103	1.64103	14.359	3.69231	9.23077	83.3846	3.07692	40	0.717949	12	4	8.20513	3.28205	144.308	21.3333	29.9487	55.6923	6.10256	22.0513	3.91795	0.584615	3.62051	0.594872	3.49744
S1700016239	SVASJ279	311.35	311.65	545162	6.73072e+06	-70.7664	Dacite A	CSBC	phlog-amph-gt-cord (4) po-py > sph	45.1836	14.0075	26.2799	9.56892	1.5008	0.0851517	1.95849	0.170303	0.0319319	1.20277	<0.002	8.51517	3.7	97.65	188.398	<1	5.6413	2.55455	15.8595	4.15114	5.53486	58.7547	11.7084	7.98297	0.638638	12.1341	4.78978	<8	0.638638	153.912	17.0303	29.6966	55.1357	5.83289	20.33	3.71474	1.45822	3.6083	0.553486	3.21448
S1700016218	SVASJ279	57.65	57.9	545277	6.73058e+06	110.701	Dacite A	Metamafite	cord-chl > musc (4)	72.7452	13.8967	3.91426	5.34327	0.155328	0.83877	2.51631	0.289945	0.0621311	0.0517759	<0.002	12.4262	3.3	99.87	1430.05	<1	7.04152	1.24262	13.5653	4.45273	8.90546	47.8409	2.07104	6.93797	0.828415	12.7369	6.52377	47.6338	2.17459	141.866	22.9885	31.3762	59.3352	6.24418	22.2636	3.96604	0.631666	3.73822	0.590245	3.73822
S1800011536	SVASJ290	144.3	144.6	545258	6.73042e+06	44.2153	Dacite A	SC		79.4376	12.0757	2.44376	1.67689	0.296524	0.214724	3.41513	0.173824	0.0204499	0.0306748	<0.002	4.08998	2.2	99.92	680.982	2.04499	2.45399	0.715746	12.7812	3.37423	7.77096	71.3701	3.06748	9.40695	0.715746	11.9632	4.39673	9.20245	4.60123	132.106	15.7464	28.6299	53.7832	5.23517	18.6094	3.21063	0.470348	2.69939	0.449898	2.59714
S1700016216	SVASJ279	34.4	34.65	545287	6.73057e+06	128.586	Dacite A	SC	Musc-q-cord-chl (4)	70.2114	15.0827	3.59012	7.73498	0.209336	0.418673	2.22943	0.397739	0.0628009	0.0523341	<0.002	20.9336	4.3	99.84	332.845	<1	1.36069	1.04668	16.6422	5.12874	17.5843	35.6919	3.14005	11.8275	1.25602	14.5489	6.48943	<8	4.50073	183.379	32.9705	38.3086	75.4658	8.40486	30.1444	6.16496	0.994348	5.58928	0.88968	5.74628
S1700016227	SVASJ279	189.35	189.6	545219	6.73065e+06	12.8786	Dacite A	CSBC	Amph ± cord-phlog (3-4)	65.3106	10.9114	13.2871	8.91412	0.441501	0.0210239	0.788395	0.178703	0.0105119	0.0840954	<0.002	8.40954	4.7	99.83	107.222	<1	9.04026	0.525597	14.6116	3.88941	7.77883	22.2853	<1	2.83822	0.630716	10.9324	4.30989	<8	<0.5	135.814	24.3877	29.4334	55.3979	6.02334	21.6546	4.30989	0.409965	3.99453	0.65174	4.15221
S1800011547	SVASJ288	243.05	243.35	545399	6.7305e+06	-32.6026	Dacite A	SC	qtz-porphyry	76.6564	13.0453	2.61317	3.75514	0.123457	0.174897	3.19959	0.185185	0.0308642	0.0308642	<0.002	5.14403	2.8	99.9	510.288	2.05761	2.26337	0.617284	10.2881	3.7037	8.23045	61.7284	2.05761	6.27572	0.720165	12.3457	5.34979	14.4033	5.55556	137.654	17.5926	32.716	61.5226	5.96708	19.4444	3.55967	0.298354	3.28189	0.504115	3.09671
S1800011537	SVASJ290	206.6	206.95	545230	6.73045e+06	-4.53301	Dacite A	CSBC	int. ser-cord-phlog-serp alt.	78.873	11.7828	2.10041	3.70902	0.0307377	0.184426	2.95082	0.143443	0.0204918	0.0102459	<0.002	3.07377	2.4	99.9	627.049	<1	2.15164	1.12705	12.0902	2.97131	6.86475	49.8975	3.07377	5.22541	0.717213	13.627	5.22541	9.22131	2.35656	102.254	13.9344	47.3361	82.2746	7.59221	23.668	3.91393	0.543033	3.2377	0.45082	2.58197
S1800011573	SVASJ265	229.3	229.7	545168	6.7307e+06	-18.7013	Dacite A	SC	ser-cord + phlog? Alt.	74.4041	13.9689	2.98446	4.93264	0.0725389	0.165803	2.95337	0.227979	0.0621762	0.0518135	<0.002	8.29016	3.5	99.82	368.912	5.18135	2.48705	1.03627	13.5751	3.93782	8.29016	48.2902	2.07254	7.04663	0.621762	10.3627	3.93782	<8	1.96891	141.451	20.7254	28.8083	57.7202	5.77202	20.4145	3.73057	0.673575	3.58549	0.528497	3.34715
S1800011553	SVASJ288	613.1	613.4	545278	6.73072e+06	-303.15	Dacite A	CSBC	ser-chl-cord-phlog alt.	68.039	12.6591	8.56263	8.58316	0.143737	0.143737	1.22177	0.287474	0.0410678	0.102669	0.00308008	16.4271	2.6	99.8	312.115	1.02669	8.00821	1.02669	13.4497	3.59343	8.31622	31.1088	2.05339	7.80287	0.718686	8.11088	3.18275	43.1211	<0.5	137.68	24.1273	31.9302	62.731	6.84805	24.538	4.9692	0.800821	4.34292	0.677618	4.36345
S1800011568	SVASJ265	121.45	121.8	545226	6.73065e+06	56.9786	Dacite A	CSBC	Ser-chl>phlog alt.	75.4592	12.8586	3.84933	4.42724	0.0412797	0.144479	2.70382	0.196078	0.0412797	0.0412797	<0.002	9.28793	3.1	99.87	706.914	2.06398	1.13519	0.412797	15.5831	4.64396	11.5583	62.1259	3.09598	4.64396	0.928793	12.8999	5.57276	<8	1.75439	161.507	31.063	51.3932	98.8648	10.3096	38.5965	7.36842	1.16615	6.41899	0.990712	5.79979
S1700016238	SVASJ279	289.1	289.35	545173	6.7307e+06	-55.9072	Dacite A	CSBC	musc-phlog-cord (3-4)	74.3515	13.592	3.30982	5.47832	0.0622536	0.145258	2.68728	0.228263	0.0415024	0.0622536	<0.002	8.30048	3.5	99.88	396.348	<1	2.07512	1.03756	13.6958	4.35775	7.15916	50.2179	2.07512	6.53663	0.622536	11.1019	4.25399	11.4132	1.45258	146.192	19.6099	29.3629	55.3019	5.7377	20.7512	3.54845	0.591409	3.50695	0.539531	3.41357
S1600040375	SVASJ280	186.85	187.05	545394	6.73054e+06	34.525	Dacite B	SC		78.278	11.9108	2.34178	0.504694	0.898355	5.47088	0.323004	0.161502	0.0302816	0.0403755	<0.002	9.08449	0.8	99.87	600.585	2.01877	1.91784	<0.1	9.69012	4.64318	9.48824	5.55163	2.01877	117.594	0.80751	11.9108	4.34037	8.0751	0.504694	170.889	24.3262	32.0985	60.5632	6.79318	23.7206	4.43121	0.62582	4.01736	0.635914	4.04764
S1700016226	SVASJ279	176.6	176.8	545225	6.73064e+06	21.9248	Dacite B	CSBC	musc > chl (3-4)	78.1417	11.345	3.19302	3.29569	0.297741	1.51951	1.94045	0.174538	0.0205339	0.0718686	<0.002	8.21355	2.5	99.9	408.624	5.13347	0.616016	0.308008	12.8337	4.92813	10.883	50.4107	2.05339	15.8111	1.12936	13.2444	6.16016	<8	0.924025	166.119	36.7556	39.5277	74.9487	8.12115	29.8768	5.80082	1.19097	5.78029	0.934292	6.22177
S1800011555	SVASJ288	642.2	642.8	545269	6.73074e+06	-322.398	Dacite B	Calc-silicate rock	si-trem-chl-phlog alt.	63.0973	10.9197	3.38266	17.3784	2.80127	0.243129	0.951374	0.179704	0.0317125	0.317125	<0.002	9.51374	5.4	99.33	85.6237	2.11416	1.58562	4.22833	12.4736	4.54545	8.13953	35.6237	2.11416	30.0211	0.634249	10.8879	5.70825	<8	1.69133	166.702	42.2833	32.4524	64.482	6.92389	27.5899	5.31712	0.983087	5.59197	0.972516	6.28964
S1800011540	SVASJ290	412.6	412.9	545134	6.73055e+06	-155.409	Dacite B	SC	ser-cord alt.	77.9218	13.035	2.31481	2.82922	0.0720165	0.185185	3.17901	0.257202	0.0308642	0.0205761	<0.002	9.25926	2.8	99.89	697.531	3.08642	1.64609	1.85185	15.6379	5.34979	12.4486	66.1523	3.08642	8.23045	0.925926	11.5226	4.52675	<8	4.52675	193.724	41.6667	37.1399	77.6749	8.35391	33.5391	6.59465	0.709877	6.46091	1.08025	7.28395
S1800011550	SVASJ288	431.9	432.25	545337	6.73061e+06	-174.814	Dacite B	CSBC	str. Ser-cord>chl alt.	77.5617	10.8951	4.81481	3.80658	0.144033	0.102881	2.27366	0.164609	0.0308642	0.0617284	<0.002	7.20165	2.8	99.89	671.811	1.02881	4.11523	1.23457	11.3169	5.04115	8.53909	51.9547	3.08642	4.52675	0.823045	12.1399	5.04115	17.4897	4.01235	176.749	34.3621	27.3663	59.5679	6.33745	23.8683	4.51646	0.37037	4.51646	0.761317	5.03086
S1700016228	SVASJ279	211.5	211.75	545209	6.73066e+06	-2.62263	Dacite B	CSBC	chl-phlog-cord (4-5)	71.6649	10.1054	6.31191	10.5585	0.358272	0.0632244	0.653319	0.200211	0.0210748	0.052687	<0.002	10.5374	4.9	99.8	83.2455	<1	3.16122	2.4236	11.6965	4.42571	7.69231	22.1286	1.05374	11.0643	0.632244	12.5395	4.84721	<8	1.68599	156.902	27.0811	28.6617	56.5859	6.18546	22.0232	4.26765	0.684932	4.19389	0.684932	4.40464
S1800011569	SVASJ265	149.7	149.95	545211	6.73067e+06	36.7281	Dacite B	CSBC	str. Cord-chl-ser-phlog alt. Trem?	68.5924	14.4538	4.07563	10.2836	0.220588	0.220588	1.55462	0.210084	0.0210084	0.0735294	<0.002	8.40336	4.8	99.75	542.017	<1	1.15546	1.78571	15.9664	6.09244	12.7101	44.958	5.2521	12.1849	0.945378	18.2773	7.87815	<8	4.93697	218.277	37.8151	41.0714	87.395	8.46639	31.0924	5.79832	0.777311	5.36765	0.913866	5.71429
S1800011542	SVASJ290	448.85	449.15	545117	6.73057e+06	-179.92	Dacite B	CSBC	w. str. cg ser-phlog-serp>cord alt.	77.6788	12.8601	2.11399	4.17617	0.103627	0.145078	2.55959	0.165803	0.0207254	0.0207254	<0.002	10.3627	3.5	99.88	329.534	2.07254	1.03627	2.90155	16.0622	5.80311	11.2953	46.5285	3.10881	12.7461	1.03627	13.9896	6.01036	<8	1.65803	208.394	33.6788	39.0674	72.6425	7.45078	26.114	5.02591	1.02591	4.88083	0.860104	5.51295
S1700016229	SVASJ279	226.3	226.6	545202	6.73067e+06	-12.8802	Dacite B	CSBC	musc-q-cord > chl-phlog (4-5)	79.1152	12.0679	2.6749	2.90123	0.0308642	0.174897	2.7572	0.164609	0.0102881	0.0205761	<0.002	10.2881	2.7	99.9	440.329	<1	0.720165	0.617284	16.358	5.65844	10.0823	44.9588	3.08642	9.87654	0.925926	13.8889	5.04115	<8	2.57202	198.148	37.4486	37.963	75.2058	8.52881	31.5844	6.26543	0.925926	6.26543	0.997942	6.25514
S1800011564	SVASJ269	65.75	66.05	545195	6.73067e+06	87.5931	Dacite B	CSBC	ser-chl-cord	84.9847	7.27365	4.27263	1.62767	0.0712106	0.0406918	1.52594	0.0813835	0.0203459	0.0305188	<0.002	5.08647	1.7	99.93	289.929	<1	2.54323	1.52594	9.3591	2.84842	6.00203	33.9776	3.05188	6.40895	0.508647	7.32452	3.15361	<8	2.95015	99.6948	26.2462	44.4557	91.5565	9.78637	38.0468	7.04985	0.549339	6.17497	0.915565	5.33062
S1800011560	SVASJ281	366.05	366.45	545201	6.73067e+06	-108.978	Dacite B	QCGA	w. mag+py	57.2187	6.51805	8.16348	26.38	0.22293	0.116773	0.498938	0.106157	0.0212314	0.0849257	<0.002	5.30786	5.8	99.35	47.7707	<1	4.67091	0.424628	8.06794	2.54777	4.24628	12.3142	1.06157	2.2293	0.318471	6.47558	2.12314	<8	0.530786	92.569	15.9236	22.1868	43.6306	4.56476	17.0913	3.39703	0.286624	2.96178	0.435244	2.6327
S1800011549	SVASJ288	408.35	408.65	545344	6.7306e+06	-157.421	Dacite C	Biotite schist	int. Bt>cord-chl>grt	63.1455	16.3832	6.90574	4.01639	2.93033	2.79713	2.62295	0.532787	0.133197	0.163934	0.0102459	15.3689	2.4	99.82	1600.41	2.04918	11.9877	1.63934	19.1598	4.81557	12.1926	68.8525	3.07377	153.791	1.22951	16.7008	6.86475	150.615	1.12705	157.377	34.2213	50.6148	97.1311	10.748	38.3197	6.99795	1.3832	6.27049	0.963115	5.57377
S1700016248	SVASJ279	70.85	71.15	545271	6.73059e+06	100.585	Dacite C	Feldspar-phyric metavolcanic rock	chl-phlog >> cord (3)	69.5275	13.7055	4.72497	3.56159	2.09205	2.786	2.82682	0.398	0.122461	0.0918461	<0.002	12.2461	1.9	99.89	1290.95	1.02051	8.26615	1.83692	12.8585	3.36769	6.12307	58.9856	1.02051	128.278	0.714359	12.1441	4.79641	51.0256	0.510256	110.011	18.8795	31.84	56.8425	6.08225	21.941	3.79631	0.653128	3.3881	0.510256	3.184
S1600040383	SVASJ281	161.65	161.9	545293	6.73056e+06	36.6885	Dacite C	SC	Sediment?	71.2923	13.6923	4.93333	4.5641	0.625641	1.98974	2.24615	0.389744	0.0923077	0.0615385	<0.002	14.359	2.4	99.9	812.308	2.05128	8.20513	1.4359	13.9487	2.87179	7.28205	48.9231	2.05128	35.8974	0.717949	12.7179	4.51282	68.7179	1.64103	103.282	19.3846	35.5897	63.6923	6.90256	23.5897	4	0.728205	3.55897	0.523077	3.16923
S1700016217	SVASJ279	53.15	53.4	545279	6.73058e+06	114.153	Dacite C	SC	chl-musc-cord (4)	69.8243	13.6972	5.39523	7.60142	0.292765	0.230029	2.33166	0.407779	0.115015	0.0731911	<0.002	13.5926	4.2	99.84	524.885	<1	8.99205	1.35926	14.9519	3.45044	6.48264	40.3597	2.09118	7.94647	0.522794	11.5015	5.22794	60.6441	0.83647	113.133	18.6115	31.6813	56.4617	5.81347	20.389	3.43998	0.752823	3.27269	0.501882	3.08448
S1700016222	SVASJ279	12.35	12.6	545297	6.73056e+06	145.657	Dacite C	SC	Chl > musc-cord (4)	70.3499	13.7023	5.83812	7.13316	0.240209	0.18799	1.82768	0.511749	0.114883	0.0208877	<0.002	28.1984	4.1	99.85	266.319	1.04439	2.29765	0.626632	17.5457	4.07311	8.66841	33.2115	3.13316	4.07311	0.73107	10.1305	4.49086	<8	1.56658	141.201	29.5561	29.5561	58.0679	6.59008	25.483	4.93995	1.16971	4.80418	0.793734	5.07572
S1600040370	SVASJ280	249.3	250.1	545362	6.73058e+06	-4.42329	Dacite C	CSBC		56.3162	14.1944	15.6096	12.4437	0.324982	0.0943495	0.262082	0.440298	0.115316	0.146766	0.0073383	13.6283	4.5	99.89	46.1264	<1	12.5799	1.88699	24.7405	3.87881	11.2171	10.4833	<1	6.7093	0.943495	13.5234	6.49963	124.751	2.62082	131.146	13.6283	10.7978	21.7004	2.6313	10.4833	1.91844	0.104833	1.90796	0.262082	1.83457
S1800011551	SVASJ288	499.7	500	545315	6.73065e+06	-224.273	Mafic	Metamafite	amph-rich	56.8681	15.2568	12.1047	3.53474	5.07553	4.89426	0.422961	1.03726	0.382679	0.251762	<0.002	33.2326	0.7	99.86	325.277	<1	20.2417	0.20141	14.9043	2.31621	5.43807	6.64653	1.00705	133.434	0.40282	4.93454	2.0141	160.121	0.805639	86.1027	19.1339	19.5368	42.6989	4.99496	18.8318	4.27996	1.07754	3.78651	0.574018	3.39376
S1600040386	SVASJ281	92.25	92.5	545323	6.73052e+06	88.1852	Mafic	Metamafite		57.3928	16.0135	10.2527	3.50967	7.19329	3.2334	1.30973	0.665098	0.194413	0.184181	<0.002	27.6271	2.1	99.83	438.964	<1	24.8644	0.204645	18.0088	2.76271	6.44633	33.8688	2.04645	256.318	0.511614	6.54865	2.66039	206.692	1.73949	92.2951	24.6598	21.1808	42.0546	5.32078	20.9762	4.33848	1.16648	4.46127	0.706027	4.33848
S1600040372	SVASJ280	225.55	225.7	545374	6.73056e+06	10.3344	Mafic	Metamafite		58.9524	16.51	12.3773	3.52309	3.4921	2.71722	0.733547	1.17781	0.278954	0.247959	0.00309949	33.0613	3	99.79	159.107	2.06633	28.5153	1.65306	21.2832	4.44261	10.435	26.2424	4.13266	181.32	0.826532	9.09185	2.78954	320.281	1.44643	164.48	32.4414	30.4784	61.1633	7.86238	30.1684	6.21965	1.41544	6.24031	0.950511	5.59975
S1600040381	SVASJ280	314.8	315.6	545329	6.73062e+06	-42.9729	Mafic	CSBC		65.2103	14.904	8.08493	3.32789	3.05227	2.89914	1.50061	0.612495	0.204165	0.132707	<0.002	20.4165	1.9	99.86	341.976	<1	13.2707	2.04165	16.5374	3.57289	7.04369	40.1184	1.02082	171.09	0.612495	9.18742	3.26664	93.9159	0.714577	125.051	25.3165	25.4185	49.8163	5.91058	22.6623	4.17517	1.12291	4.15476	0.64312	3.9608
S1600040374	SVASJ280	331.9	332.1	545320	6.73063e+06	-52.7257	Mafic	CSBC		61.5819	15.4802	9.2039	4.2527	3.50282	2.13662	2.73241	0.688238	0.205444	0.112994	<0.002	24.6533	2.5	99.85	951.207	2.05444	17.8737	3.08166	14.6893	2.97894	6.16333	65.6394	1.02722	145.249	0.513611	8.11505	2.7735	182.845	0.616333	109.091	21.7771	23.2152	46.0195	5.2491	20.1335	3.91371	1.00668	3.83154	0.585516	3.83154
S1800011559	SVASJ281	291	291.4	545234	6.73063e+06	-56.4834	Mafic	SC	mod. Chl-ser alt.	56.0986	15.3183	12.9261	7.09446	3.8809	1.93018	1.2731	0.882957	0.205339	0.13347	<0.002	34.9076	2.6	99.8	400.411	2.05339	26.8994	1.84805	15.8111	1.64271	3.6961	30.2875	<1	126.694	0.308008	4.51745	1.64271	266.94	0.718686	67.3511	18.0698	16.0164	30.6982	3.56263	12.8337	3.03901	0.821355	3.01848	0.482546	3.32649
S1700016224	SVASJ279	125.6	125.8	545247	6.73061e+06	59.1996	Mafic	Metamafite	chl-epid-mag (1)	52.5297	16.7561	14.1264	8.35174	3.63942	1.70401	1.56727	0.957189	0.231408	0.14726	<0.002	39.9705	4.7	99.77	433.365	2.10371	31.6609	0.946671	18.0919	2.2089	3.89187	33.975	<1	124.014	0.420743	5.04891	2.10371	280.846	<0.5	78.8892	21.0371	17.4608	36.1839	4.0812	15.3571	3.27127	0.946671	3.60787	0.568003	3.71305
S1700016215	SVASJ279	24.6	24.85	545291	6.73057e+06	136.166	Mafic	Metamafite	Weak	51.5828	18.0799	12.5272	7.44162	3.91282	1.05864	3.40426	1.47379	0.332122	0.186819	<0.002	41.5153	3.4	99.75	379.865	<1	33.9388	4.4629	21.4842	3.94395	8.51064	73.3783	3.11365	145.407	0.518941	5.18941	2.38713	259.471	0.62273	146.03	33.7312	26.7774	56.4608	6.81889	26.8812	5.72911	2.25221	5.9782	0.985989	6.15464
S1800011552	SVASJ288	565.4	565.7	545294	6.73069e+06	-270.881	Mafic	CSBC	int. Ser-cord-chl alt.	56.43	18.1481	9.66049	9.19753	2.23251	1.91358	0.90535	0.864198	0.216049	0.164609	<0.002	31.893	2.8	99.77	109.053	<1	21.5021	1.44033	17.4897	3.1893	7.40741	18.107	<1	105.247	0.514403	6.99588	2.57202	144.033	<0.5	115.329	25.1029	23.5597	48.0453	5.26749	20.7819	4.27984	1.09053	4.23868	0.668724	4.37243
S1600040376	SVASJ280	325.5	325.7	545323	6.73062e+06	-49.0238	Mafic	CSBC		54.5273	18.5197	10.5706	10.0547	0.821226	0.484312	3.70604	0.810697	0.210571	0.210571	<0.002	30.5327	4.9	99.88	1083.39	<1	20.4254	4.00084	19.3725	3.05327	8.10697	93.4934	3.15856	15.3717	0.526427	8.10697	2.8427	205.306	1.15814	119.183	23.3733	24.5315	47.7995	5.71699	21.5835	4.34828	0.610655	4.52727	0.705412	4.243
S1600040369	SVASJ280	306	306.85	545333	6.73061e+06	-37.8523	Mafic	CSBC		56.489	16.8344	12.1835	9.94809	0.656849	0.158915	1.93876	1.123	0.444962	0.201293	<0.002	36.0208	5.5	99.89	344.316	1.05943	22.46	1.69509	21.0827	2.75453	6.14472	46.0854	2.11887	5.615	0.423774	6.03878	2.64859	166.331	0.741604	106.261	21.5065	21.1887	42.8011	5.53025	22.7778	4.492	0.985274	4.57676	0.656849	4.03644
S1800011563	SVASJ269	48.3	48.7	545205	6.73067e+06	100.296	Mafic	Biotite schist	int. Phlog-chl-cord alt.	66.9823	14.0687	8.77211	6.37877	0.260146	0.0936524	2.48699	0.551509	0.135276	0.0520291	<0.002	22.8928	3.9	99.83	406.868	<1	15.6087	1.66493	15.4006	3.01769	5.7232	59.001	1.04058	5.61915	0.520291	7.59625	2.91363	145.682	0.728408	105.203	21.9563	23.8293	47.3465	5.22373	19.563	4.12071	0.634755	3.80853	0.634755	3.99584
S1800011538	SVASJ290	240.2	240.5	545215	6.73047e+06	-30.3257	Mafic	CSBC	str. Chl-phlog-cord-antho alt.	56.1394	15.4735	9.61498	15.1301	0.332986	0.218522	1.74818	0.69719	0.176899	0.0936524	<0.002	26.0146	3.9	99.7	164.412	3.12175	18.3143	1.2487	17.0656	2.60146	7.28408	29.2404	4.16233	6.86785	0.520291	8.53278	3.53798	99.8959	14.36	91.155	43.0801	27.7836	52.0291	5.36941	20.0832	3.82934	0.874089	4.38085	0.790843	5.30697
S1600040379	SVASJ280	264.35	265.45	545355	6.73059e+06	-13.5383	Marble/Skarn	Calc-silicate rock	Trem skarn	41.8174	0.868854	23.8782	3.7003	27.65	<0.01	<0.01	0.0102218	0.0204436	2.0137	<0.002	4.08873	2.1	99.93	6.13309	3.06654	5.92865	0.102218	7.15527	0.102218	0.306654	0.408873	15.3327	3.3732	<0.1	0.306654	2.86211	13.2884	26.2701	4.08873	4.39538	1.43105	4.08873	0.541756	1.83993	0.286211	0.480425	0.357763	0.0511091	0.388429
S1800011558	SVASJ281	222.3	223.15	545265	6.73059e+06	-7.58085	Marble/Skarn	Calc-silicate rock	diopside alt	44.4179	25.8524	7.32848	1.0395	16.0187	0.977131	3.19127	0.31185	0.43659	0.135135	<0.002	21.8295	3.8	99.76	485.447	1.0395	12.1622	0.519751	34.1996	4.88565	10.8108	65.4886	5.19751	649.688	0.831601	11.3306	7.79626	44.6985	269.127	173.077	48.4407	49.1684	94.1788	10.5198	39.605	7.98337	2.31809	7.76507	1.32017	8.43035
S1600040377	SVASJ280	257.1	258.1	545358	6.73058e+06	-9.19158	Marble/Skarn	Calc-silicate rock	Trem skarn	46.7847	2.57623	21.6766	8.55389	18.5468	0.130824	0.0201268	0.0603804	0.0402536	1.63027	<0.002	5.0317	0.5	99.87	15.0951	5.0317	10.3653	0.100634	6.74248	1.50951	2.71712	0.603804	15.0951	13.6862	0.301902	4.62916	8.45326	20.1268	9.15769	51.2227	9.4596	16.9065	25.1585	2.79763	9.86213	1.68059	3.70333	1.59002	0.241522	1.28812
S1800011570	SVASJ265	173.65	174.65	545198	6.73068e+06	19.7481	Marble/Skarn	Dolomite marble	minor ophical.+ sulphides	4.12671	0.770548	2.03767	33.1336	54.5205	<0.01	<0.01	0.0171233	<0.01	2.19178	<0.002	<1	41.6	98.18	3.42466	<1	1.88356	<0.1	<0.5	<0.1	<0.1	0.342466	<1	60.1027	<0.1	0.856164	1.19863	<8	14.3836	10.6164	8.39041	6.50685	10.7877	1.09589	4.96575	0.702055	0.582192	1.04452	0.0856164	0.821918
S1800011565	SVASJ269	83.8	84.55	545186	6.73068e+06	74.2776	Marble/Skarn	Dolomite marble	serp. + yellow sph/Fe	9.07692	2.41026	1.79487	34.4786	50.1709	<0.01	<0.01	0.0683761	0.017094	1.38462	<0.002	3.4188	41.5	99.63	5.12821	<1	0.512821	<0.1	1.53846	1.02564	2.22222	<0.1	1.7094	60.3419	0.17094	2.73504	3.76068	13.6752	31.6239	37.7778	7.17949	8.37607	18.4615	2.06838	8.03419	1.4359	0.683761	1.24786	0.188034	1.21368
S1800011554	SVASJ288	640.5	641.1	545270	6.73074e+06	-321.285	Marble/Skarn	Dolomite marble	ophicalcite w. sph+mag	12.8365	3.42949	3.01282	32.484	43.4135	<0.01	<0.01	0.0961538	0.0480769	3.23718	<0.002	3.20513	37.6	99.12	3.20513	3.20513	3.84615	<0.1	2.24359	1.12179	2.88462	<0.1	<1	48.2372	0.320513	3.6859	4.32692	14.4231	7.85256	41.3462	11.2179	11.5385	23.3974	2.54808	10.0962	2.11538	0.432692	2.03526	0.272436	1.76282
S1700016232	SVASJ279	241.8	242.35	545194	6.73068e+06	-23.6586	Marble/Skarn	Calc-silicate rock	trem > talc > serp (5) sph-gn-py-mag	56.4403	1.78926	8.71612	21.3247	11.2169	0.125562	0.0209271	0.0209271	<0.01	0.345297	<0.002	<1	3	98.57	<1	<1	2.40661	<0.1	2.92979	0.418541	0.627812	<0.1	25.1125	2.19734	<0.1	0.732447	0.523177	<8	0.732447	15.5907	9.20791	2.09271	5.65031	0.837083	3.66224	0.868473	0.303443	1.10913	0.188344	1.16145
S1800011541	SVASJ290	432.05	432.55	545125	6.73056e+06	-168.671	Marble/Skarn	Calc-silicate rock	trem-serp-talc alt.	58.1828	4.82143	2.2479	25.4622	8.0042	0.052521	0.0105042	0.0630252	0.0210084	0.598739	<0.002	5.2521	4.8	99.49	2.10084	3.15126	2.41597	<0.1	6.09244	1.78571	1.05042	<0.1	5.2521	1.47059	<0.1	3.78151	1.05042	<8	0.735294	72.8992	25.7353	10.6092	20.4832	2.66807	11.8697	3.34034	0.871849	3.72899	0.714286	4.66387
S1600040380	SVASJ280	268.4	269.3	545353	6.73059e+06	-15.8762	Marble/Skarn	Calc-silicate rock	chl schist	53.6768	1.97789	17.9734	19.647	5.52794	0.213003	0.0507151	0.020286	0.0507151	0.882442	<0.002	5.07151	1.3	99.89	13.1859	<1	9.33158	0.20286	6.79582	0.20286	<0.1	1.82574	3.0429	1.31859	<0.1	0.710011	1.82574	26.3718	<0.5	8.52013	9.12871	3.24577	6.89725	0.953444	4.76722	1.40988	0.20286	2.01846	0.33472	1.87646
S1700016230	SVASJ279	232.55	232.8	545199	6.73067e+06	-17.1769	Marble/Skarn	Calc-silicate rock	q-act >> phlog (4-5) mag > py	84.7371	4.8392	7.18734	2.78714	0.163349	<0.01	0.102093	0.071465	<0.01	0.0612557	0.00204186	3.06279	2	99.95	4.08372	<1	4.79837	<0.1	7.65697	2.65442	5.10465	2.34814	<1	0.612557	0.408372	6.22767	2.55232	<8	<0.5	94.538	15.3139	10.5156	21.0311	2.32772	8.77999	1.80704	0.193977	1.84788	0.326697	2.38897
S1800011556	SVASJ288	660.8	661.5	545263	6.73076e+06	-334.509	Marble/Skarn	Calc-silicate rock	mag-rich trem-chl alt.	52.655	0.878099	21.8079	22.4174	0.867769	0.123967	<0.01	0.0206612	0.0103306	0.0929752	<0.002	<1	3.2	98.95	2.06612	<1	8.8843	<0.1	2.99587	0.206612	0.929752	0.309917	6.19835	1.8595	<0.1	0.72314	4.33884	17.562	0.826446	7.02479	2.47934	2.78926	5.06198	0.516529	1.7562	0.413223	0.0826446	0.423554	0.072314	0.423554
S1700016231	SVASJ279	236.25	236.65	545197	6.73067e+06	-19.7815	Marble/Skarn	Calc-silicate rock	q >> act (5) py > po	84.5617	4.33176	7.19565	3.5619	0.061589	<0.01	0.102648	0.0513242	<0.01	0.0821187	<0.002	3.07945	2.5	99.92	13.3443	<1	5.54301	0.205297	11.1887	1.53972	2.05297	3.69534	<1	1.23178	0.205297	4.00328	2.36091	<8	3.1821	57.791	9.75159	11.1887	22.172	2.44303	9.03305	1.6629	0.266886	1.58078	0.256621	1.64237
S1800011543	SVASJ290	493.7	494	545095	6.7306e+06	-209.823	Rhyolite	QCGA	Grt-antho rich rock skarn?	70.9495	9.12121	15.7677	3.36364	0.0505051	0.30303	0.282828	0.0505051	<0.01	0.0606061	<0.002	4.0404	1	99.9	52.5253	<1	12.3232	1.11111	11.4141	2.62626	5.35354	8.68687	2.0202	3.33333	0.505051	11.3131	5.05051	<8	0.606061	85.8586	19.596	30.6061	61.9192	5.9697	19.798	3.76768	0.111111	3.28283	0.555556	3.60606
S1800011566	SVASJ269	95.75	96.1	545179	6.73069e+06	65.6966	Rhyolite	QCGA	chl alt. More mafic comp?	77.0431	7.38193	9.75359	4.8152	0.26694	0.0924025	0.390144	0.0410678	<0.01	0.0718686	0.00205339	3.08008	2.6	99.89	133.47	<1	7.28953	0.821355	10.2669	2.15606	4.82546	10.6776	<1	20.5339	0.513347	8.62423	4.31211	<8	1.64271	67.8645	18.8912	11.6016	20.8419	2.34086	8.7269	2.29979	0.112936	2.70021	0.523614	3.31622
S1700016236	SVASJ279	269.65	269.95	545182	6.73069e+06	-42.691	Rhyolite	QCGA	chl-phlog-cord-gt-antho (4-5)	67.6697	9.7566	15.9495	6.04909	0.164322	0.0924309	0.174592	0.0513505	<0.01	0.0616206	<0.002	2.05402	2.5	99.87	33.8913	<1	10.0647	0.821608	12.8376	2.87563	6.26476	5.64856	1.02701	5.44315	0.616206	11.0917	4.92965	<8	2.46482	86.577	17.0484	35.2265	61.3125	6.24422	21.4645	3.76913	0.400534	3.4713	0.534045	3.12211
S1700016234	SVASJ279	255.8	256.1	545188	6.73068e+06	-33.2024	Rhyolite	QCGA	chl-cord-amph-grt ± cpy (4)	72.2902	10.2591	11.399	4.74611	0.145078	0.0518135	0.92228	0.0621762	<0.01	0.0829016	<0.002	3.10881	3.4	99.9	131.606	<1	3.00518	0.725389	9.74093	3.41969	6.73575	24.9741	2.07254	1.86528	0.829016	12.8497	4.66321	<8	<0.5	97.7202	22.2798	21.7617	44.5596	4.92228	17.8238	3.3057	0.165803	3.36788	0.580311	3.73057
S1800011572	SVASJ265	187.3	187.6	545190	6.73068e+06	10.5091	Rhyolite	CSBC	ser-cord-chl	70.1244	14.5285	7.80311	4.31088	0.11399	0.124352	2.66321	0.0932642	0.0103627	0.0829016	<0.002	5.18135	3.5	99.88	565.803	3.10881	5.18135	2.38342	14.1969	4.45596	9.94819	66.3212	5.18135	9.63731	1.03627	18.7565	6.63212	<8	0.932642	142.28	28.2902	35.8549	74.9223	7.54404	27.3575	4.98446	0.42487	4.48705	0.704663	4.68394
S1700016233	SVASJ279	252.15	252.45	545190	6.73068e+06	-30.6947	Rhyolite	CSBC	musc > chl-cord (5)	77.3347	10.5154	2.93597	7.21499	0.0937012	0.08329	1.68662	0.0624675	<0.01	0.0520562	0.00312337	4.1645	3.8	99.85	279.021	2.08225	1.35346	1.56169	14.4716	3.3316	8.64133	48.3082	3.12337	8.53722	1.04112	13.9511	4.9974	<8	0.937012	96.9287	21.9677	25.7158	47.6835	5.25768	17.6991	3.6127	0.385216	3.49818	0.58303	3.76887
S1700016237	SVASJ279	275.25	275.55	545179	6.73069e+06	-46.5161	Rhyolite	CSBC	chl-musc-cord (4)	68.3106	13.3683	8.20567	8.59391	0.0629591	0.0944386	1.13326	0.0944386	<0.01	0.0839454	<0.002	5.24659	4.5	99.8	250.787	<1	9.234	1.04932	11.1228	4.72193	10.703	31.3746	5.24659	3.56768	1.04932	17.8384	7.03043	<8	<0.5	133.473	25.4984	32.0042	60.4407	6.47429	22.6653	3.74607	0.241343	3.75656	0.671563	3.97692
S1800011561	SVASJ281	406.4	406.8	545185	6.73069e+06	-136.503	Rhyolite	QCGA	int. Chl alt.	61.7125	12.6956	15	9.7463	0.137421	0.0211416	0.295983	0.0739958	<0.01	0.0845666	<0.002	4.22833	5.4	99.8	50.74	<1	12.1564	0.634249	20.0846	3.69979	7.7167	8.24524	2.11416	2.64271	0.845666	13.9535	5.60254	<8	<0.5	108.14	24.63	30.3383	56.9767	6.02537	20.4017	4.04863	0.295983	3.96406	0.655391	4.12262
S1600040385	SVASJ281	154.45	154.7	545296	6.73055e+06	42.0101	Tholeiitic Mafic	Dolerite dyke	Unaltered	47.1559	16.5317	12.1349	9.32664	10.1261	1.39387	2.08056	0.840422	0.0819924	0.21523	0.0276724	43.046	2.3	99.87	572.922	<1	53.5001	0.819924	15.4761	1.1274	0.512453	54.9349	<1	75.3305	<0.1	<0.2	<0.1	252.127	<0.5	38.5364	18.8583	2.66475	6.4569	1.01466	5.63698	1.83458	0.707185	2.74675	0.491954	3.22845
[truncated: 29 more columns]

## Sheet: Summary statistics
								Rocktype	Variable	SiO2_pct	Al2O3_pct	Fe2O3_pct	MgO_pct	CaO_pct	Na2O_pct	K2O_pct	TiO2_pct	P2O5_pct	MnO_pct	Cr2O3_pct	Sc_ppm	LOI_pct	Sum_pct	Ba_ppm	Be_ppm	Co_ppm	Cs_ppm	Ga_ppm	Hf_ppm	Nb_ppm	Rb_ppm	Sn_ppm	Sr_ppm	Ta_ppm	Th_ppm	U_ppm	V_ppm	W_ppm	Zr_ppm	Y_ppm	La_ppm	Ce_ppm	Pr_ppm	Nd_ppm	Sm_ppm	Eu_ppm	Gd_ppm	Tb_ppm	Dy_ppm
								Biotite schist	Median	66.9823	14.0687	6.90574	4.87179	0.584615	0.984615	2.48699	0.532787	0.133197	0.0520291	0.001	15.3846	2.5	99.83	1036.92	0.5	11.9877	1.66493	16.2051	4.10256	8.41026	59.001	3.07377	44.7179	0.615385	9.12821	3.48718	145.682	0.820513	149.436	30.2564	31.5897	63.5897	6.92308	24.9231	5.41538	1.31282	4.95385	0.861538	5.30256
									MAD	5.57084	1.94032	2.24247	1.18119	0.311213	0.935289	0.367886	0.152677	0.0471251	0.0614544	0	3.76198	0.75	0.02	596.771	0	4.30619	0.359815	1.87961	0.898942	3.23471	11.5544	1.01817	41.5225	0.330239	4.55228	1.97556	73.3074	0.199321	26.0871	4.38457	10.0279	20.8977	2.22742	6.92771	1.43862	0.294685	0.855533	0.161822	0.788966
								Calc-silicate rock	Median	55.0586	3.45399	8.0223	12.9662	6.76607	0.124765	0.0358211	0.0558523	0.020726	0.331211	0.001	4.56021	2.75	99.815	9.6595	0.769751	5.73583	0.101426	6.97555	1.52462	1.55169	1.21477	5.2248	2.02842	0.127648	3.8924	2.70722	8.64418	1.25889	54.5069	9.60559	10.5624	20.7572	2.38537	8.90652	1.67175	0.391934	1.71895	0.291659	1.75942
									MAD	8.15625	1.57042	5.20702	9.33507	6.25051	0.103301	0.0308211	0.0350582	0.015726	0.25831	0	1.48909	0.9	0.125	6.56723	0.269751	3.32454	0.0514261	2.43139	1.2239	1.20523	1.14907	3.91772	1.07071	0.0776483	3.1646	1.64421	4.64418	1.23389	43.0089	5.45928	7.5449	14.4834	1.49011	4.69179	1.0309	0.253623	0.952605	0.16133	0.98271
								CSBC	Median	68.5924	13.179	7.80311	5.47832	0.297741	0.145258	1.78351	0.196078	0.0308642	0.0829016	0.001	9.28793	3.5	99.86	341.976	0.5	4.21811	1.44033	14.6893	3.88941	8.31622	44.9588	3.07377	8.53722	0.718686	12.1341	4.78978	4	1.15814	137.68	25.3165	29.4845	59.5679	6.33745	22.6653	4.30989	0.800821	4.34292	0.677618	4.36345
									MAD	8.96929	1.39623	3.72748	2.57708	0.234782	0.0619684	0.77608	0.0719628	0.0203523	0.0308453	0	4.10658	0.9	0.03	200.04	0	3.18184	0.60132	1.85559	0.754548	1.45147	13.5842	1.02038	3.64765	0.204283	1.85552	1.2518	0	1.13314	22.3505	5.70658	4.95306	11.7684	0.968042	2.3353	0.563827	0.289714	0.537913	0.0945884	0.667415
								Dolomite marble	Median	9.07692	2.41026	2.03767	33.1336	50.1709	0.005	0.005	0.0683761	0.017094	2.19178	0.001	3.20513	41.5	99.12	3.42466	0.5	1.88356	0.05	1.53846	1.02564	2.22222	0.05	0.5	60.1027	0.17094	2.73504	3.76068	13.6752	14.3836	37.7778	8.39041	8.37607	18.4615	2.06838	8.03419	1.4359	0.582192	1.24786	0.188034	1.21368
									MAD	3.75962	1.01923	0.242799	0.649587	4.34961	0	0	0.0277778	0.012094	0.807165	0	0.213675	0.1	0.51	0.219529	0	1.37074	0	0.705128	0.0961538	0.662393	0	0	0.239141	0.12094	0.950855	0.566239	0.747863	6.531	3.56838	1.21092	1.86922	4.9359	0.479701	2.06197	0.679487	0.101569	0.203343	0.0844017	0.391757
								Feldspar-phyric metavolcanic rock	Median	75.0305	13.3096	3.06718	0.873096	1.54618	3.44025	2.23305	0.222875	0.0408122	0.0709723	0.001	10.0402	1.2	99.93	877.264	1.02051	2.12917	0.812018	12.8585	4.34168	8.32487	42.5382	2.02184	128.278	0.709723	12.1421	4.71888	17.1648	0.803213	155.328	23.098	30.9976	58.2594	6.35097	21.941	4.19023	0.734111	3.8253	0.60241	3.90185
									MAD	0.595119	0.257436	0.345402	0.410769	0.413957	0.645727	0.774014	0.0220719	0.00988235	0.0202039	0	1.92904	0.3	0.01	197.061	0.520512	0.513661	0.203684	0.99112	0.176392	0.510468	14.4283	0.00594477	19.468	0.0975408	1.18068	0.671521	7.10847	0.292957	7.12181	2.4146	0.986424	1.41683	0.268716	1.28907	0.39392	0.0669052	0.405287	0.0560168	0.402718
								Metamafite	Median	57.3928	16.0135	12.1047	3.53474	3.63942	2.40644	1.30973	0.957189	0.231408	0.184181	0.001	33.0613	3	99.83	433.365	0.5	24.8644	1.22362	18.0088	3.94395	8.51064	33.975	2.07104	133.434	0.518941	6.54865	2.66039	206.692	1.44643	141.866	24.6598	26.7774	56.4608	6.24418	22.2636	4.33848	1.16648	4.46127	0.706027	4.33848
									MAD	4.8631	0.756709	1.852	1.26086	1.43611	0.826954	0.576184	0.292092	0.100714	0.0637786	0	6.90928	0.9	0.04	108.088	0	6.79646	0.429448	3.12147	0.542637	2.06431	7.73259	1.06399	43.4983	0.116122	1.61411	0.556678	74.1538	0.640791	22.6138	3.62265	5.59657	13.7619	1.24921	4.61752	1.06721	0.219808	0.853403	0.132009	0.62543
								QCGA	Median	69.3096	9.43891	13.1995	5.43214	0.1547	0.0924167	0.343063	0.0567633	0.005	0.0773851	0.001	3.57461	3	99.88	51.6326	0.5	8.67711	0.773372	10.8405	2.75095	5.80915	9.68224	1.54089	2.98802	0.564777	11.2024	4.79643	4	0.568423	89.573	19.2436	26.2626	50.7682	5.44599	18.8109	3.58235	0.226214	3.32535	0.5448	3.46114
									MAD	5.28884	1.43857	2.65909	1.37727	0.0427546	0.0324797	0.108055	0.0109769	0	0.00736107	0	0.574124	1.25	0.02	10.8016	0	3.56273	0.0936794	1.54835	0.399032	0.955145	2.03449	0.522764	0.940728	0.153016	2.11276	0.369195	0	0.543423	5.93081	2.61571	4.4222	8.84097	0.688808	1.6552	0.231714	0.0915234	0.254756	0.0283485	0.304229
								SC	Median	73.686	13.2341	3.31849	4.2654	0.307547	0.877132	2.28891	0.24655	0.0515442	0.0461939	0.001	9.24501	2.6	99.87	573.476	1.53158	2.31515	1.04148	14.1318	3.69801	8.01989	48.6066	2.08186	24.1861	0.716848	11.7392	4.44379	8.70379	1.80497	134.88	20.6	31.8899	58.0143	6.21514	21.97	3.82426	0.719041	3.57223	0.525787	3.33682
									MAD	3.65189	0.788137	0.9476	2.02309	0.150267	0.690545	0.592226	0.0781462	0.02068	0.0155769	0	4.73079	0.6	0.03	148.56	0.784126	0.671596	0.419518	1.99502	0.413835	1.1389	13.0183	0.979847	15.8848	0.0928741	0.792565	0.475827	4.70379	1.29571	16.5493	3.01739	3.17084	3.8697	0.453831	1.97186	0.495613	0.144131	0.456939	0.0713543	0.361015
Sample	Hole ID	From	To	X	Y	Z	Chemoclassification	Rock type	Logged alteration	SiO2_pct	Al2O3_pct	Fe2O3_pct	MgO_pct	CaO_pct	Na2O_pct	K2O_pct	TiO2_pct	P2O5_pct	MnO_pct	Cr2O3_pct	Sc_ppm	LOI_pct	Sum_pct	Ba_ppm	Be_ppm	Co_ppm	Cs_ppm	Ga_ppm	Hf_ppm	Nb_ppm	Rb_ppm	Sn_ppm	Sr_ppm	Ta_ppm	Th_ppm	U_ppm	V_ppm	W_ppm	Zr_ppm	Y_ppm	La_ppm	Ce_ppm	Pr_ppm	Nd_ppm	Sm_ppm	Eu_ppm	Gd_ppm	Tb_ppm	Dy_ppm
S1800011539	SVASJ290	296.6	296.85	545189	6.73049e+06	-72.703	Dacite A	Biotite schist	int. Phlog alt.	74.2872	12.5026	4.28718	4.87179	0.584615	0.984615	1.88718	0.246154	0.0410256	0.0410256	0.001	15.3846	2.5	99.86	1036.92	0.5	0.512821	2.35897	16.2051	4.10256	8.41026	45.7436	3.07692	44.7179	0.615385	9.12821	3.48718	4	0.820513	149.436	30.2564	31.5897	63.5897	6.92308	24.9231	5.41538	1.31282	4.95385	0.861538	5.30256
S1800011549	SVASJ288	408.35	408.65	545344	6.7306e+06	-157.421	Dacite C	Biotite schist	int. Bt>cord-chl>grt	63.1455	16.3832	6.90574	4.01639	2.93033	2.79713	2.62295	0.532787	0.133197	0.163934	0.0102459	15.3689	2.4	99.82	1600.41	2.04918	11.9877	1.63934	19.1598	4.81557	12.1926	68.8525	3.07377	153.791	1.22951	16.7008	6.86475	150.615	1.12705	157.377	34.2213	50.6148	97.1311	10.748	38.3197	6.99795	1.3832	6.27049	0.963115	5.57377
S1800011563	SVASJ269	48.3	48.7	545205	6.73067e+06	100.296	Mafic	Biotite schist	int. Phlog-chl-cord alt.	66.9823	14.0687	8.77211	6.37877	0.260146	0.0936524	2.48699	0.551509	0.135276	0.0520291	0.001	22.8928	3.9	99.83	406.868	0.5	15.6087	1.66493	15.4006	3.01769	5.7232	59.001	1.04058	5.61915	0.520291	7.59625	2.91363	145.682	0.728408	105.203	21.9563	23.8293	47.3465	5.22373	19.563	4.12071	0.634755	3.80853	0.634755	3.99584
S1800011571	SVASJ265	178.6	179.5	545195	6.73068e+06	16.3442	Anomalous sample	Calc-silicate rock	Blue chl-mag rich rock unknown comp.	26.4168	17.2547	30.2977	24.5976	0.286659	0.005	0.005	0.0330761	0.0110254	0.418964	0.001	4.41014	9.3	99.38	3.30761	0.5	16.9791	0.05	59.5369	0.551268	0.220507	0.110254	7.71775	0.771775	0.05	1.32304	9.92282	4	1.98456	24.5865	35.0606	19.2944	38.0375	4.16759	16.4278	3.75965	0.793826	4.38809	0.639471	3.49504
S1800011555	SVASJ288	642.2	642.8	545269	6.73074e+06	-322.398	Dacite B	Calc-silicate rock	si-trem-chl-phlog alt.	63.0973	10.9197	3.38266	17.3784	2.80127	0.243129	0.951374	0.179704	0.0317125	0.317125	0.001	9.51374	5.4	99.33	85.6237	2.11416	1.58562	4.22833	12.4736	4.54545	8.13953	35.6237	2.11416	30.0211	0.634249	10.8879	5.70825	4	1.69133	166.702	42.2833	32.4524	64.482	6.92389	27.5899	5.31712	0.983087	5.59197	0.972516	6.28964
S1600040379	SVASJ280	264.35	265.45	545355	6.73059e+06	-13.5383	Marble/Skarn	Calc-silicate rock	Trem skarn	41.8174	0.868854	23.8782	3.7003	27.65	0.005	0.005	0.0102218	0.0204436	2.0137	0.001	4.08873	2.1	99.93	6.13309	3.06654	5.92865	0.102218	7.15527	0.102218	0.306654	0.408873	15.3327	3.3732	0.05	0.306654	2.86211	13.2884	26.2701	4.08873	4.39538	1.43105	4.08873	0.541756	1.83993	0.286211	0.480425	0.357763	0.0511091	0.388429
S1800011558	SVASJ281	222.3	223.15	545265	6.73059e+06	-7.58085	Marble/Skarn	Calc-silicate rock	diopside alt	44.4179	25.8524	7.32848	1.0395	16.0187	0.977131	3.19127	0.31185	0.43659	0.135135	0.001	21.8295	3.8	99.76	485.447	1.0395	12.1622	0.519751	34.1996	4.88565	10.8108	65.4886	5.19751	649.688	0.831601	11.3306	7.79626	44.6985	269.127	173.077	48.4407	49.1684	94.1788	10.5198	39.605	7.98337	2.31809	7.76507	1.32017	8.43035
S1600040377	SVASJ280	257.1	258.1	545358	6.73058e+06	-9.19158	Marble/Skarn	Calc-silicate rock	Trem skarn	46.7847	2.57623	21.6766	8.55389	18.5468	0.130824	0.0201268	0.0603804	0.0402536	1.63027	0.001	5.0317	0.5	99.87	15.0951	5.0317	10.3653	0.100634	6.74248	1.50951	2.71712	0.603804	15.0951	13.6862	0.301902	4.62916	8.45326	20.1268	9.15769	51.2227	9.4596	16.9065	25.1585	2.79763	9.86213	1.68059	3.70333	1.59002	0.241522	1.28812
S1700016232	SVASJ279	241.8	242.35	545194	6.73068e+06	-23.6586	Marble/Skarn	Calc-silicate rock	trem > talc > serp (5) sph-gn-py-mag	56.4403	1.78926	8.71612	21.3247	11.2169	0.125562	0.0209271	0.0209271	0.005	0.345297	0.001	0.5	3	98.57	0.5	0.5	2.40661	0.05	2.92979	0.418541	0.627812	0.05	25.1125	2.19734	0.05	0.732447	0.523177	4	0.732447	15.5907	9.20791	2.09271	5.65031	0.837083	3.66224	0.868473	0.303443	1.10913	0.188344	1.16145
S1800011541	SVASJ290	432.05	432.55	545125	6.73056e+06	-168.671	Marble/Skarn	Calc-silicate rock	trem-serp-talc alt.	58.1828	4.82143	2.2479	25.4622	8.0042	0.052521	0.0105042	0.0630252	0.0210084	0.598739	0.001	5.2521	4.8	99.49	2.10084	3.15126	2.41597	0.05	6.09244	1.78571	1.05042	0.05	5.2521	1.47059	0.05	3.78151	1.05042	4	0.735294	72.8992	25.7353	10.6092	20.4832	2.66807	11.8697	3.34034	0.871849	3.72899	0.714286	4.66387
S1600040380	SVASJ280	268.4	269.3	545353	6.73059e+06	-15.8762	Marble/Skarn	Calc-silicate rock	chl schist	53.6768	1.97789	17.9734	19.647	5.52794	0.213003	0.0507151	0.020286	0.0507151	0.882442	0.001	5.07151	1.3	99.89	13.1859	0.5	9.33158	0.20286	6.79582	0.20286	0.05	1.82574	3.0429	1.31859	0.05	0.710011	1.82574	26.3718	0.025	8.52013	9.12871	3.24577	6.89725	0.953444	4.76722	1.40988	0.20286	2.01846	0.33472	1.87646
S1700016230	SVASJ279	232.55	232.8	545199	6.73067e+06	-17.1769	Marble/Skarn	Calc-silicate rock	q-act >> phlog (4-5) mag > py	84.7371	4.8392	7.18734	2.78714	0.163349	0.005	0.102093	0.071465	0.005	0.0612557	0.00204186	3.06279	2	99.95	4.08372	0.5	4.79837	0.05	7.65697	2.65442	5.10465	2.34814	0.5	0.612557	0.408372	6.22767	2.55232	4	0.025	94.538	15.3139	10.5156	21.0311	2.32772	8.77999	1.80704	0.193977	1.84788	0.326697	2.38897
S1800011556	SVASJ288	660.8	661.5	545263	6.73076e+06	-334.509	Marble/Skarn	Calc-silicate rock	mag-rich trem-chl alt.	52.655	0.878099	21.8079	22.4174	0.867769	0.123967	0.005	0.0206612	0.0103306	0.0929752	0.001	0.5	3.2	98.95	2.06612	0.5	8.8843	0.05	2.99587	0.206612	0.929752	0.309917	6.19835	1.8595	0.05	0.72314	4.33884	17.562	0.826446	7.02479	2.47934	2.78926	5.06198	0.516529	1.7562	0.413223	0.0826446	0.423554	0.072314	0.423554
S1700016231	SVASJ279	236.25	236.65	545197	6.73067e+06	-19.7815	Marble/Skarn	Calc-silicate rock	q >> act (5) py > po	84.5617	4.33176	7.19565	3.5619	0.061589	0.005	0.102648	0.0513242	0.005	0.0821187	0.001	3.07945	2.5	99.92	13.3443	0.5	5.54301	0.205297	11.1887	1.53972	2.05297	3.69534	0.5	1.23178	0.205297	4.00328	2.36091	4	3.1821	57.791	9.75159	11.1887	22.172	2.44303	9.03305	1.6629	0.266886	1.58078	0.256621	1.64237
S1800011567	SVASJ265	74.2	74.5	545249	6.73063e+06	92.5761	Dacite A	CSBC	ser-cord-chl	72.0928	12.7938	4.5567	5.23711	0.752577	2.17526	1.78351	0.268041	0.0515464	0.0515464	0.001	15.4639	3	99.86	578.351	3.09278	1.85567	0.824742	16.701	4.12371	8.96907	40	2.06186	62.5773	0.721649	9.38144	4.63918	4	0.025	147.835	31.8557	29.4845	61.5464	6.68041	25.8763	4.85567	1.26804	4.61856	0.721649	4.91753
S1800011574	SVASJ265	247.6	248	545158	6.73071e+06	-31.4135	Dacite A	CSBC	phlog-amph-qtz alt.	59.4856	13.179	20.607	3.55967	1.10082	0.329218	0.462963	0.185185	0.0205761	0.113169	0.001	7.20165	2.8	99.07	70.9877	3.08642	4.21811	0.514403	12.1399	3.80658	8.84774	16.0494	11.3169	28.3951	0.720165	10.4938	4.21811	4	8.84774	155.556	17.9012	32.716	62.1399	6.43004	22.1193	4.0535	1.11111	3.61111	0.545267	3.43621
S1700016239	SVASJ279	311.35	311.65	545162	6.73072e+06	-70.7664	Dacite A	CSBC	phlog-amph-gt-cord (4) po-py > sph	45.1836	14.0075	26.2799	9.56892	1.5008	0.0851517	1.95849	0.170303	0.0319319	1.20277	0.001	8.51517	3.7	97.65	188.398	0.5	5.6413	2.55455	15.8595	4.15114	5.53486	58.7547	11.7084	7.98297	0.638638	12.1341	4.78978	4	0.638638	153.912	17.0303	29.6966	55.1357	5.83289	20.33	3.71474	1.45822	3.6083	0.553486	3.21448
S1700016227	SVASJ279	189.35	189.6	545219	6.73065e+06	12.8786	Dacite A	CSBC	Amph ± cord-phlog (3-4)	65.3106	10.9114	13.2871	8.91412	0.441501	0.0210239	0.788395	0.178703	0.0105119	0.0840954	0.001	8.40954	4.7	99.83	107.222	0.5	9.04026	0.525597	14.6116	3.88941	7.77883	22.2853	0.5	2.83822	0.630716	10.9324	4.30989	4	0.025	135.814	24.3877	29.4334	55.3979	6.02334	21.6546	4.30989	0.409965	3.99453	0.65174	4.15221
S1800011537	SVASJ290	206.6	206.95	545230	6.73045e+06	-4.53301	Dacite A	CSBC	int. ser-cord-phlog-serp alt.	78.873	11.7828	2.10041	3.70902	0.0307377	0.184426	2.95082	0.143443	0.0204918	0.0102459	0.001	3.07377	2.4	99.9	627.049	0.5	2.15164	1.12705	12.0902	2.97131	6.86475	49.8975	3.07377	5.22541	0.717213	13.627	5.22541	9.22131	2.35656	102.254	13.9344	47.3361	82.2746	7.59221	23.668	3.91393	0.543033	3.2377	0.45082	2.58197
S1800011553	SVASJ288	613.1	613.4	545278	6.73072e+06	-303.15	Dacite A	CSBC	ser-chl-cord-phlog alt.	68.039	12.6591	8.56263	8.58316	0.143737	0.143737	1.22177	0.287474	0.0410678	0.102669	0.00308008	16.4271	2.6	99.8	312.115	1.02669	8.00821	1.02669	13.4497	3.59343	8.31622	31.1088	2.05339	7.80287	0.718686	8.11088	3.18275	43.1211	0.025	137.68	24.1273	31.9302	62.731	6.84805	24.538	4.9692	0.800821	4.34292	0.677618	4.36345
S1800011568	SVASJ265	121.45	121.8	545226	6.73065e+06	56.9786	Dacite A	CSBC	Ser-chl>phlog alt.	75.4592	12.8586	3.84933	4.42724	0.0412797	0.144479	2.70382	0.196078	0.0412797	0.0412797	0.001	9.28793	3.1	99.87	706.914	2.06398	1.13519	0.412797	15.5831	4.64396	11.5583	62.1259	3.09598	4.64396	0.928793	12.8999	5.57276	4	1.75439	161.507	31.063	51.3932	98.8648	10.3096	38.5965	7.36842	1.16615	6.41899	0.990712	5.79979
S1700016238	SVASJ279	289.1	289.35	545173	6.7307e+06	-55.9072	Dacite A	CSBC	musc-phlog-cord (3-4)	74.3515	13.592	3.30982	5.47832	0.0622536	0.145258	2.68728	0.228263	0.0415024	0.0622536	0.001	8.30048	3.5	99.88	396.348	0.5	2.07512	1.03756	13.6958	4.35775	7.15916	50.2179	2.07512	6.53663	0.622536	11.1019	4.25399	11.4132	1.45258	146.192	19.6099	29.3629	55.3019	5.7377	20.7512	3.54845	0.591409	3.50695	0.539531	3.41357
S1700016226	SVASJ279	176.6	176.8	545225	6.73064e+06	21.9248	Dacite B	CSBC	musc > chl (3-4)	78.1417	11.345	3.19302	3.29569	0.297741	1.51951	1.94045	0.174538	0.0205339	0.0718686	0.001	8.21355	2.5	99.9	408.624	5.13347	0.616016	0.308008	12.8337	4.92813	10.883	50.4107	2.05339	15.8111	1.12936	13.2444	6.16016	4	0.924025	166.119	36.7556	39.5277	74.9487	8.12115	29.8768	5.80082	1.19097	5.78029	0.934292	6.22177
S1800011550	SVASJ288	431.9	432.25	545337	6.73061e+06	-174.814	Dacite B	CSBC	str. Ser-cord>chl alt.	77.5617	10.8951	4.81481	3.80658	0.144033	0.102881	2.27366	0.164609	0.0308642	0.0617284	0.001	7.20165	2.8	99.89	671.811	1.02881	4.11523	1.23457	11.3169	5.04115	8.53909	51.9547	3.08642	4.52675	0.823045	12.1399	5.04115	17.4897	4.01235	176.749	34.3621	27.3663	59.5679	6.33745	23.8683	4.51646	0.37037	4.51646	0.761317	5.03086
S1700016228	SVASJ279	211.5	211.75	545209	6.73066e+06	-2.62263	Dacite B	CSBC	chl-phlog-cord (4-5)	71.6649	10.1054	6.31191	10.5585	0.358272	0.0632244	0.653319	0.200211	0.0210748	0.052687	0.001	10.5374	4.9	99.8	83.2455	0.5	3.16122	2.4236	11.6965	4.42571	7.69231	22.1286	1.05374	11.0643	0.632244	12.5395	4.84721	4	1.68599	156.902	27.0811	28.6617	56.5859	6.18546	22.0232	4.26765	0.684932	4.19389	0.684932	4.40464
S1800011569	SVASJ265	149.7	149.95	545211	6.73067e+06	36.7281	Dacite B	CSBC	str. Cord-chl-ser-phlog alt. Trem?	68.5924	14.4538	4.07563	10.2836	0.220588	0.220588	1.55462	0.210084	0.0210084	0.0735294	0.001	8.40336	4.8	99.75	542.017	0.5	1.15546	1.78571	15.9664	6.09244	12.7101	44.958	5.2521	12.1849	0.945378	18.2773	7.87815	4	4.93697	218.277	37.8151	41.0714	87.395	8.46639	31.0924	5.79832	0.777311	5.36765	0.913866	5.71429
S1800011542	SVASJ290	448.85	449.15	545117	6.73057e+06	-179.92	Dacite B	CSBC	w. str. cg ser-phlog-serp>cord alt.	77.6788	12.8601	2.11399	4.17617	0.103627	0.145078	2.55959	0.165803	0.0207254	0.0207254	0.001	10.3627	3.5	99.88	329.534	2.07254	1.03627	2.90155	16.0622	5.80311	11.2953	46.5285	3.10881	12.7461	1.03627	13.9896	6.01036	4	1.65803	208.394	33.6788	39.0674	72.6425	7.45078	26.114	5.02591	1.02591	4.88083	0.860104	5.51295
S1700016229	SVASJ279	226.3	226.6	545202	6.73067e+06	-12.8802	Dacite B	CSBC	musc-q-cord > chl-phlog (4-5)	79.1152	12.0679	2.6749	2.90123	0.0308642	0.174897	2.7572	0.164609	0.0102881	0.0205761	0.001	10.2881	2.7	99.9	440.329	0.5	0.720165	0.617284	16.358	5.65844	10.0823	44.9588	3.08642	9.87654	0.925926	13.8889	5.04115	4	2.57202	198.148	37.4486	37.963	75.2058	8.52881	31.5844	6.26543	0.925926	6.26543	0.997942	6.25514
S1800011564	SVASJ269	65.75	66.05	545195	6.73067e+06	87.5931	Dacite B	CSBC	ser-chl-cord	84.9847	7.27365	4.27263	1.62767	0.0712106	0.0406918	1.52594	0.0813835	0.0203459	0.0305188	0.001	5.08647	1.7	99.93	289.929	0.5	2.54323	1.52594	9.3591	2.84842	6.00203	33.9776	3.05188	6.40895	0.508647	7.32452	3.15361	4	2.95015	99.6948	26.2462	44.4557	91.5565	9.78637	38.0468	7.04985	0.549339	6.17497	0.915565	5.33062
S1600040370	SVASJ280	249.3	250.1	545362	6.73058e+06	-4.42329	Dacite C	CSBC		56.3162	14.1944	15.6096	12.4437	0.324982	0.0943495	0.262082	0.440298	0.115316	0.146766	0.0073383	13.6283	4.5	99.89	46.1264	0.5	12.5799	1.88699	24.7405	3.87881	11.2171	10.4833	0.5	6.7093	0.943495	13.5234	6.49963	124.751	2.62082	131.146	13.6283	10.7978	21.7004	2.6313	10.4833	1.91844	0.104833	1.90796	0.262082	1.83457
S1600040381	SVASJ280	314.8	315.6	545329	6.73062e+06	-42.9729	Mafic	CSBC		65.2103	14.904	8.08493	3.32789	3.05227	2.89914	1.50061	0.612495	0.204165	0.132707	0.001	20.4165	1.9	99.86	341.976	0.5	13.2707	2.04165	16.5374	3.57289	7.04369	40.1184	1.02082	171.09	0.612495	9.18742	3.26664	93.9159	0.714577	125.051	25.3165	25.4185	49.8163	5.91058	22.6623	4.17517	1.12291	4.15476	0.64312	3.9608
S1600040374	SVASJ280	331.9	332.1	545320	6.73063e+06	-52.7257	Mafic	CSBC		61.5819	15.4802	9.2039	4.2527	3.50282	2.13662	2.73241	0.688238	0.205444	0.112994	0.001	24.6533	2.5	99.85	951.207	2.05444	17.8737	3.08166	14.6893	2.97894	6.16333	65.6394	1.02722	145.249	0.513611	8.11505	2.7735	182.845	0.616333	109.091	21.7771	23.2152	46.0195	5.2491	20.1335	3.91371	1.00668	3.83154	0.585516	3.83154
S1800011552	SVASJ288	565.4	565.7	545294	6.73069e+06	-270.881	Mafic	CSBC	int. Ser-cord-chl alt.	56.43	18.1481	9.66049	9.19753	2.23251	1.91358	0.90535	0.864198	0.216049	0.164609	0.001	31.893	2.8	99.77	109.053	0.5	21.5021	1.44033	17.4897	3.1893	7.40741	18.107	0.5	105.247	0.514403	6.99588	2.57202	144.033	0.025	115.329	25.1029	23.5597	48.0453	5.26749	20.7819	4.27984	1.09053	4.23868	0.668724	4.37243
S1600040376	SVASJ280	325.5	325.7	545323	6.73062e+06	-49.0238	Mafic	CSBC		54.5273	18.5197	10.5706	10.0547	0.821226	0.484312	3.70604	0.810697	0.210571	0.210571	0.001	30.5327	4.9	99.88	1083.39	0.5	20.4254	4.00084	19.3725	3.05327	8.10697	93.4934	3.15856	15.3717	0.526427	8.10697	2.8427	205.306	1.15814	119.183	23.3733	24.5315	47.7995	5.71699	21.5835	4.34828	0.610655	4.52727	0.705412	4.243
S1600040369	SVASJ280	306	306.85	545333	6.73061e+06	-37.8523	Mafic	CSBC		56.489	16.8344	12.1835	9.94809	0.656849	0.158915	1.93876	1.123	0.444962	0.201293	0.001	36.0208	5.5	99.89	344.316	1.05943	22.46	1.69509	21.0827	2.75453	6.14472	46.0854	2.11887	5.615	0.423774	6.03878	2.64859	166.331	0.741604	106.261	21.5065	21.1887	42.8011	5.53025	22.7778	4.492	0.985274	4.57676	0.656849	4.03644
S1800011538	SVASJ290	240.2	240.5	545215	6.73047e+06	-30.3257	Mafic	CSBC	str. Chl-phlog-cord-antho alt.	56.1394	15.4735	9.61498	15.1301	0.332986	0.218522	1.74818	0.69719	0.176899	0.0936524	0.001	26.0146	3.9	99.7	164.412	3.12175	18.3143	1.2487	17.0656	2.60146	7.28408	29.2404	4.16233	6.86785	0.520291	8.53278	3.53798	99.8959	14.36	91.155	43.0801	27.7836	52.0291	5.36941	20.0832	3.82934	0.874089	4.38085	0.790843	5.30697
S1800011572	SVASJ265	187.3	187.6	545190	6.73068e+06	10.5091	Rhyolite	CSBC	ser-cord-chl	70.1244	14.5285	7.80311	4.31088	0.11399	0.124352	2.66321	0.0932642	0.0103627	0.0829016	0.001	5.18135	3.5	99.88	565.803	3.10881	5.18135	2.38342	14.1969	4.45596	9.94819	66.3212	5.18135	9.63731	1.03627	18.7565	6.63212	4	0.932642	142.28	28.2902	35.8549	74.9223	7.54404	27.3575	4.98446	0.42487	4.48705	0.704663	4.68394
S1700016233	SVASJ279	252.15	252.45	545190	6.73068e+06	-30.6947	Rhyolite	CSBC	musc > chl-cord (5)	77.3347	10.5154	2.93597	7.21499	0.0937012	0.08329	1.68662	0.0624675	0.005	0.0520562	0.00312337	4.1645	3.8	99.85	279.021	2.08225	1.35346	1.56169	14.4716	3.3316	8.64133	48.3082	3.12337	8.53722	1.04112	13.9511	4.9974	4	0.937012	96.9287	21.9677	25.7158	47.6835	5.25768	17.6991	3.6127	0.385216	3.49818	0.58303	3.76887
S1700016237	SVASJ279	275.25	275.55	545179	6.73069e+06	-46.5161	Rhyolite	CSBC	chl-musc-cord (4)	68.3106	13.3683	8.20567	8.59391	0.0629591	0.0944386	1.13326	0.0944386	0.005	0.0839454	0.001	5.24659	4.5	99.8	250.787	0.5	9.234	1.04932	11.1228	4.72193	10.703	31.3746	5.24659	3.56768	1.04932	17.8384	7.03043	4	0.025	133.473	25.4984	32.0042	60.4407	6.47429	22.6653	3.74607	0.241343	3.75656	0.671563	3.97692
S1600040385	SVASJ281	154.45	154.7	545296	6.73055e+06	42.0101	Tholeiitic Mafic	Dolerite dyke	Unaltered	47.1559	16.5317	12.1349	9.32664	10.1261	1.39387	2.08056	0.840422	0.0819924	0.21523	0.0276724	43.046	2.3	99.87	572.922	0.5	53.5001	0.819924	15.4761	1.1274	0.512453	54.9349	0.5	75.3305	0.05	0.1	0.05	252.127	0.025	38.5364	18.8583	2.66475	6.4569	1.01466	5.63698	1.83458	0.707185	2.74675	0.491954	3.22845
S1800011570	SVASJ265	173.65	174.65	545198	6.73068e+06	19.7481	Marble/Skarn	Dolomite marble	minor ophical.+ sulphides	4.12671	0.770548	2.03767	33.1336	54.5205	0.005	0.005	0.0171233	0.005	2.19178	0.001	0.5	41.6	98.18	3.42466	0.5	1.88356	0.05	0.025	0.05	0.05	0.342466	0.5	60.1027	0.05	0.856164	1.19863	4	14.3836	10.6164	8.39041	6.50685	10.7877	1.09589	4.96575	0.702055	0.582192	1.04452	0.0856164	0.821918
S1800011565	SVASJ269	83.8	84.55	545186	6.73068e+06	74.2776	Marble/Skarn	Dolomite marble	serp. + yellow sph/Fe	9.07692	2.41026	1.79487	34.4786	50.1709	0.005	0.005	0.0683761	0.017094	1.38462	0.001	3.4188	41.5	99.63	5.12821	0.5	0.512821	0.05	1.53846	1.02564	2.22222	0.05	1.7094	60.3419	0.17094	2.73504	3.76068	13.6752	31.6239	37.7778	7.17949	8.37607	18.4615	2.06838	8.03419	1.4359	0.683761	1.24786	0.188034	1.21368
S1800011554	SVASJ288	640.5	641.1	545270	6.73074e+06	-321.285	Marble/Skarn	Dolomite marble	ophicalcite w. sph+mag	12.8365	3.42949	3.01282	32.484	43.4135	0.005	0.005	0.0961538	0.0480769	3.23718	0.001	3.20513	37.6	99.12	3.20513	3.20513	3.84615	0.05	2.24359	1.12179	2.88462	0.05	0.5	48.2372	0.320513	3.6859	4.32692	14.4231	7.85256	41.3462	11.2179	11.5385	23.3974	2.54808	10.0962	2.11538	0.432692	2.03526	0.272436	1.76282
S1700016235	SVASJ279	262.05	262.35	545185	6.73069e+06	-37.4894	Dacite A	Feldspar-phyric metavolcanic rock	q-ser > chl (3) grt	75.6256	13.5143	2.90751	0.668625	2.86698	3.27221	0.729409	0.222875	0.0506534	0.0911762	0.00202614	6.07841	1.2	99.91	267.45	3.03921	2.53267	1.21568	11.6503	4.35619	8.40847	28.2646	2.02614	272.617	0.911762	15.8039	6.58495	20.2614	1.01307	148.415	23.098	32.2156	58.6567	6.21011	21.2744	3.77875	0.699017	3.53561	0.58758	3.95097
S1700016220	SVASJ279	93.35	93.6	545261	6.7306e+06	83.5031	Dacite A	Feldspar-phyric metavolcanic rock	Chl (1)	74.8048	13.3631	3.35598	0.628612	1.80472	4.08598	1.54111	0.233195	0.0506945	0.0709723	0.001	11.1528	1.3	99.93	850.654	1.01389	3.14306	0.608334	12.8764	4.76528	8.51668	37.007	2.02778	157.457	0.811112	13.5861	6.18473	14.1945	0.025	155.328	25.4486	34.675	66.714	7.0364	25.1445	4.59292	0.841529	4.2482	0.709723	4.35973
S1800011548	SVASJ288	348	348.3	545364	6.73056e+06	-112.3	Dacite A	Feldspar-phyric metavolcanic rock	mag-rich	74.5482	13.3096	3.28934	0.873096	1.58376	4.4467	1.46193	0.243655	0.0507614	0.0609137	0.00304569	11.1675	1.5	99.91	680.203	2.03046	3.65482	1.01523	10.5584	4.46701	8.32487	42.5381	1.01523	168.426	0.609137	13.9086	5.17766	24.3655	0.71066	155.939	25.6853	36.9543	68.4264	7.36041	26.1929	4.84264	0.903553	4.31472	0.690355	4.30457
S1700016223	SVASJ279	115.7	115.9	545252	6.73061e+06	66.6453	Dacite A	Feldspar-phyric metavolcanic rock	Least altered	75.3523	12.5013	2.64625	1.95681	1.57153	4.52195	0.851668	0.263611	0.0506945	0.0506945	0.001	8.11112	1.3	99.93	1758.09	0.5	2.12917	0.101389	11.1528	4.05556	7.80696	10.8486	2.02778	112.035	0.709723	14.6	6.4889	21.2917	0.025	139.309	20.6834	30.0112	55.6626	5.93126	21.2917	3.7007	0.679306	3.37625	0.567779	3.4675
S1700016244	SVASJ279	445	445.3	545104	6.7308e+06	-155.909	Dacite A	Feldspar-phyric metavolcanic rock	q-bt (1-2)	75.9252	12.4598	3.06718	0.532985	1.04586	4.3041	2.24256	0.211183	0.0402253	0.0703942	0.001	10.0563	0.5	99.94	625.503	3.01689	1.60901	2.91633	12.0676	4.52534	8.34674	42.5382	2.01126	137.47	0.804505	10.9614	4.22365	10.0563	0.905068	156.175	22.5261	30.5712	59.4328	6.36565	23.2301	4.34433	0.734111	4.0527	0.65366	3.90185
S1700016241	SVASJ279	344.2	344.5	545147	6.73074e+06	-92.2065	Dacite A	Feldspar-phyric metavolcanic rock	musc-bt-q (1-2)	75.4528	13.5384	2.46889	1.33563	1.38622	3.44025	1.9832	0.182131	0.0303552	0.0404735	0.001	7.08287	1.1	99.93	877.264	1.01184	1.72013	0.809471	13.761	4.35091	7.28524	56.9665	2.02368	129.212	0.607103	12.1421	4.04735	9.10655	2.02368	163.614	18.719	29.6469	56.0559	5.89902	20.0344	3.84499	0.68805	3.42001	0.546393	3.36942
S1700016221	SVASJ279	104.75	104.95	545256	6.7306e+06	74.9075	Dacite A	Feldspar-phyric metavolcanic rock	chl >> cord (1-2)	73.064	12.4783	4.62198	2.38751	2.88746	2.63238	1.45903	0.265279	0.0408122	0.0816243	0.001	15.3046	1.9	99.91	729.517	0.5	0.816243	0.918274	16.0188	3.97919	7.44822	32.8538	2.04061	138.047	0.612182	8.87665	3.46903	4	0.025	143.863	30.099	28.7726	58.2594	6.45852	24.5893	4.95868	1.09173	4.6832	0.765228	5.18314
S1800011575	SVASJ265	316.2	316.55	545121	6.73075e+06	-79.0497	Dacite A	Feldspar-phyric metavolcanic rock	least altered. bt wisps -> pumice?	75.241	13.0522	2.26908	0.361446	1.54618	3.39357	3.6747	0.200803	0.0401606	0.0401606	0.001	10.0402	0.4	99.93	824.297	1.00402	1.30522	0.301205	13.1526	4.51807	8.83534	62.8514	2.00803	111.948	0.702811	11.1446	4.71888	4	0.803213	162.45	25	31.3253	59.8394	6.35542	23.494	4.29719	0.813253	3.8253	0.60241	4.01606
S1700016243	SVASJ279	406.2	406.5	545120	6.73077e+06	-132.048	Dacite A	Feldspar-phyric metavolcanic rock	musc >> chl (1)	75.0305	13.1547	3.20747	1.47178	1.00487	3.51198	2.23305	0.203004	0.0304507	0.091352	0.001	10.1502	1.4	99.92	883.069	2.03004	2.33455	0.812018	15.4283	4.26309	9.0337	40.9054	2.03004	108.81	0.91352	11.2667	3.55258	4	2.03004	162.81	24.5635	30.3492	57.0443	6.46569	23.1425	4.21234	0.791717	3.90784	0.619164	3.80633
S1700016242	SVASJ279	374.35	374.65	545134	6.73075e+06	-111.714	Dacite A	Feldspar-phyric metavolcanic rock	fsp (1) Least altered	75.6563	12.2375	3.09976	0.52504	1.37318	3.13005	3.53393	0.191842	0.0302908	0.100969	0.001	9.08724	0.9	99.94	978.393	1.00969	1.61551	0.403877	12.3183	4.34168	7.97658	70.8805	2.01939	94.0024	0.706785	11.8134	4.13974	17.1648	0.605816	160.44	23.6268	30.9976	58.0574	6.35097	21.6074	4.19023	0.737076	3.90751	0.615913	4.02868
S1700016240	SVASJ279	321.5	321.9	545158	6.73072e+06	-77.4602	Dacite A	Feldspar-phyric metavolcanic rock	musc-bt-q (1-2)	73.9891	13.7788	2.61828	1.28387	1.13223	3.48767	3.27537	0.181965	0.0404367	0.0606551	0.001	7.07643	1	99.92	1111	3.03275	1.92074	0.909826	13.8496	4.24586	7.48079	59.2398	2.02184	107.663	0.707643	11.7266	4.34695	18.1965	2.83057	153.356	20.2184	30.1254	56.4092	5.91387	21.7347	3.83138	0.667206	3.55843	0.545896	3.60898
S1800011545	SVASJ290	600.95	601.25	545041	6.73066e+06	-278.631	Dacite A	Feldspar-phyric metavolcanic rock	weak. Phlog alt or primary bt?	72.8931	13.5081	2.72177	0.745968	1.11895	2.43952	5.92742	0.231855	0.0604839	0.0806452	0.001	5.04032	0.8	99.93	1653.23	2.01613	2.62097	0.705645	11.0887	3.93145	8.36694	66.3306	2.01613	108.77	0.907258	19.7581	8.66935	21.1694	0.806452	131.754	17.7419	33.4677	58.6694	5.65524	18.3468	3.34677	0.534274	2.78226	0.46371	2.95363
S1700016248	SVASJ279	70.85	71.15	545271	6.73059e+06	100.585	Dacite C	Feldspar-phyric metavolcanic rock	chl-phlog >> cord (3)	69.5275	13.7055	4.72497	3.56159	2.09205	2.786	2.82682	0.398	0.122461	0.0918461	0.001	12.2461	1.9	99.89	1290.95	1.02051	8.26615	1.83692	12.8585	3.36769	6.12307	58.9856	1.02051	128.278	0.714359	12.1441	4.79641	51.0256	0.510256	110.011	18.8795	31.84	56.8425	6.08225	21.941	3.79631	0.653128	3.3881	0.510256	3.184
S1600040368	SVASJ280	234.1	234.35	545370	6.73057e+06	5.02607	Dacite A	Metamafite		74.7833	11.3286	6.10788	2.27389	1.24401	2.40644	1.22362	0.336494	0.101968	0.101968	0.00203936	12.2362	1.8	99.87	691.343	2.03936	7.54563	1.22362	14.8873	4.48659	11.4204	38.5439	5.0984	89.9358	0.815744	11.9303	4.28266	107.066	1.63149	156.827	26.8176	41.9088	77.2917	9.15672	34.5671	6.373	1.31539	5.71021	0.79535	4.7823
S1700016218	SVASJ279	57.65	57.9	545277	6.73058e+06	110.701	Dacite A	Metamafite	cord-chl > musc (4)	72.7452	13.8967	3.91426	5.34327	0.155328	0.83877	2.51631	0.289945	0.0621311	0.0517759	0.001	12.4262	3.3	99.87	1430.05	0.5	7.04152	1.24262	13.5653	4.45273	8.90546	47.8409	2.07104	6.93797	0.828415	12.7369	6.52377	47.6338	2.17459	141.866	22.9885	31.3762	59.3352	6.24418	22.2636	3.96604	0.631666	3.73822	0.590245	3.73822
S1800011551	SVASJ288	499.7	500	545315	6.73065e+06	-224.273	Mafic	Metamafite	amph-rich	56.8681	15.2568	12.1047	3.53474	5.07553	4.89426	0.422961	1.03726	0.382679	0.251762	0.001	33.2326	0.7	99.86	325.277	0.5	20.2417	0.20141	14.9043	2.31621	5.43807	6.64653	1.00705	133.434	0.40282	4.93454	2.0141	160.121	0.805639	86.1027	19.1339	19.5368	42.6989	4.99496	18.8318	4.27996	1.07754	3.78651	0.574018	3.39376
S1600040386	SVASJ281	92.25	92.5	545323	6.73052e+06	88.1852	Mafic	Metamafite		57.3928	16.0135	10.2527	3.50967	7.19329	3.2334	1.30973	0.665098	0.194413	0.184181	0.001	27.6271	2.1	99.83	438.964	0.5	24.8644	0.204645	18.0088	2.76271	6.44633	33.8688	2.04645	256.318	0.511614	6.54865	2.66039	206.692	1.73949	92.2951	24.6598	21.1808	42.0546	5.32078	20.9762	4.33848	1.16648	4.46127	0.706027	4.33848
S1600040372	SVASJ280	225.55	225.7	545374	6.73056e+06	10.3344	Mafic	Metamafite		58.9524	16.51	12.3773	3.52309	3.4921	2.71722	0.733547	1.17781	0.278954	0.247959	0.00309949	33.0613	3	99.79	159.107	2.06633	28.5153	1.65306	21.2832	4.44261	10.435	26.2424	4.13266	181.32	0.826532	9.09185	2.78954	320.281	1.44643	164.48	32.4414	30.4784	61.1633	7.86238	30.1684	6.21965	1.41544	6.24031	0.950511	5.59975
S1700016224	SVASJ279	125.6	125.8	545247	6.73061e+06	59.1996	Mafic	Metamafite	chl-epid-mag (1)	52.5297	16.7561	14.1264	8.35174	3.63942	1.70401	1.56727	0.957189	0.231408	0.14726	0.001	39.9705	4.7	99.77	433.365	2.10371	31.6609	0.946671	18.0919	2.2089	3.89187	33.975	0.5	124.014	0.420743	5.04891	2.10371	280.846	0.025	78.8892	21.0371	17.4608	36.1839	4.0812	15.3571	3.27127	0.946671	3.60787	0.568003	3.71305
S1700016215	SVASJ279	24.6	24.85	545291	6.73057e+06	136.166	Mafic	Metamafite	Weak	51.5828	18.0799	12.5272	7.44162	3.91282	1.05864	3.40426	1.47379	0.332122	0.186819	0.001	41.5153	3.4	99.75	379.865	0.5	33.9388	4.4629	21.4842	3.94395	8.51064	73.3783	3.11365	145.407	0.518941	5.18941	2.38713	259.471	0.62273	146.03	33.7312	26.7774	56.4608	6.81889	26.8812	5.72911	2.25221	5.9782	0.985989	6.15464
S1800011560	SVASJ281	366.05	366.45	545201	6.73067e+06	-108.978	Dacite B	QCGA	w. mag+py	57.2187	6.51805	8.16348	26.38	0.22293	0.116773	0.498938	0.106157	0.0212314	0.0849257	0.001	5.30786	5.8	99.35	47.7707	0.5	4.67091	0.424628	8.06794	2.54777	4.24628	12.3142	1.06157	2.2293	0.318471	6.47558	2.12314	4	0.530786	92.569	15.9236	22.1868	43.6306	4.56476	17.0913	3.39703	0.286624	2.96178	0.435244	2.6327
S1800011543	SVASJ290	493.7	494	545095	6.7306e+06	-209.823	Rhyolite	QCGA	Grt-antho rich rock skarn?	70.9495	9.12121	15.7677	3.36364	0.0505051	0.30303	0.282828	0.0505051	0.005	0.0606061	0.001	4.0404	1	99.9	52.5253	0.5	12.3232	1.11111	11.4141	2.62626	5.35354	8.68687	2.0202	3.33333	0.505051	11.3131	5.05051	4	0.606061	85.8586	19.596	30.6061	61.9192	5.9697	19.798	3.76768	0.111111	3.28283	0.555556	3.60606
S1800011566	SVASJ269	95.75	96.1	545179	6.73069e+06	65.6966	Rhyolite	QCGA	chl alt. More mafic comp?	77.0431	7.38193	9.75359	4.8152	0.26694	0.0924025	0.390144	0.0410678	0.005	0.0718686	0.00205339	3.08008	2.6	99.89	133.47	0.5	7.28953	0.821355	10.2669	2.15606	4.82546	10.6776	0.5	20.5339	0.513347	8.62423	4.31211	4	1.64271	67.8645	18.8912	11.6016	20.8419	2.34086	8.7269	2.29979	0.112936	2.70021	0.523614	3.31622
S1700016236	SVASJ279	269.65	269.95	545182	6.73069e+06	-42.691	Rhyolite	QCGA	chl-phlog-cord-gt-antho (4-5)	67.6697	9.7566	15.9495	6.04909	0.164322	0.0924309	0.174592	0.0513505	0.005	0.0616206	0.001	2.05402	2.5	99.87	33.8913	0.5	10.0647	0.821608	12.8376	2.87563	6.26476	5.64856	1.02701	5.44315	0.616206	11.0917	4.92965	4	2.46482	86.577	17.0484	35.2265	61.3125	6.24422	21.4645	3.76913	0.400534	3.4713	0.534045	3.12211
S1700016234	SVASJ279	255.8	256.1	545188	6.73068e+06	-33.2024	Rhyolite	QCGA	chl-cord-amph-grt ± cpy (4)	72.2902	10.2591	11.399	4.74611	0.145078	0.0518135	0.92228	0.0621762	0.005	0.0829016	0.001	3.10881	3.4	99.9	131.606	0.5	3.00518	0.725389	9.74093	3.41969	6.73575	24.9741	2.07254	1.86528	0.829016	12.8497	4.66321	4	0.025	97.7202	22.2798	21.7617	44.5596	4.92228	17.8238	3.3057	0.165803	3.36788	0.580311	3.73057
S1800011561	SVASJ281	406.4	406.8	545185	6.73069e+06	-136.503	Rhyolite	QCGA	int. Chl alt.	61.7125	12.6956	15	9.7463	0.137421	0.0211416	0.295983	0.0739958	0.005	0.0845666	0.001	4.22833	5.4	99.8	50.74	0.5	12.1564	0.634249	20.0846	3.69979	7.7167	8.24524	2.11416	2.64271	0.845666	13.9535	5.60254	4	0.025	108.14	24.63	30.3383	56.9767	6.02537	20.4017	4.04863	0.295983	3.96406	0.655391	4.12262
S1700016225	SVASJ279	157	157.3	545233	6.73063e+06	35.9762	Dacite A	SC	Musc-chl (1)	72.0348	12.3926	5.18405	3.54806	2.38241	2.12679	1.76892	0.286299	0.0613497	0.132924	0.001	16.3599	2.1	99.9	592.025	1.02249	2.04499	1.43149	14.3149	3.88548	6.95297	46.0123	1.02249	70.0409	0.511247	8.28221	3.27198	4	0.025	131.186	26.6871	28.2209	53.5787	6.16564	23.0061	4.45808	1.03272	4.33538	0.715746	4.5501
S1800011546	SVASJ288	93.55	93.95	545450	6.73042e+06	84.7237	Dacite A	SC	str. Ser-phlog alt.	77.5152	12.1805	3.36714	1.62272	0.669371	2.32252	1.93712	0.15213	0.030426	0.030426	0.001	4.0568	1.4	99.94	786.004	0.5	2.33266	0.608519	11.359	3.24544	7.80933	37.7282	3.0426	32.9615	0.709939	11.8661	4.66531	12.1704	3.44828	123.529	18.2556	31.0345	56.998	5.92292	19.7769	3.65112	0.40568	3.14402	0.486815	3.11359
S1600040371	SVASJ280	210.9	211.1	545382	6.73055e+06	19.4335	Dacite A	SC		78.2928	12.0607	3.26984	0.998268	0.234287	0.926963	3.67729	0.162983	0.0509321	0.0305592	0.001	5.09321	1.7	99.87	2355.1	0.5	3.25965	0.509321	11.7144	3.46338	7.43608	83.4267	3.05592	36.2636	0.713049	13.9554	4.88948	26.4847	2.44474	123.969	20.4747	33.2077	57.9607	6.26464	20.271	3.53468	0.753794	3.32077	0.488948	3.22909
S1600040382	SVASJ281	165.2	165.4	545291	6.73056e+06	34.0959	Dacite A	SC	Coherent?	78.6558	10.9136	2.8363	3.9667	0.31857	0.955709	2.01418	0.184976	0.0513822	0.0411057	0.00205529	6.16586	2.6	99.91	554.928	0.5	5.03545	2.36358	10.482	2.67187	6.37139	50.0462	1.02764	20.3473	0.616586	11.6124	3.90505	25.6911	0.513822	86.9386	17.5727	36.2758	63.4056	6.67968	21.8888	3.52482	0.565204	3.10348	0.452163	2.86713
S1800011562	SVASJ269	32.6	32.9	545213	6.73066e+06	112.132	Dacite A	SC	ser-chl schist	72.9679	13.423	4.41572	4.70527	0.423992	0.827301	2.64736	0.279214	0.0517063	0.0620476	0.001	16.546	3.3	99.86	533.609	2.06825	0.827301	0.930714	16.4426	4.23992	9.61737	52.12	2.06825	28.0248	0.827301	9.8242	2.79214	4	1.24095	158.221	32.3681	35.4705	70.8376	7.58014	29.7828	5.72906	1.36505	5.58428	0.879007	5.39814
S1800011544	SVASJ290	525.4	525.7	545079	6.73062e+06	-230.64	Dacite A	SC	str. Ser-phlog+Si alt.	72.1538	13.8667	2.4	5.72308	0.348718	1.09744	3.78462	0.235897	0.0410256	0.0512821	0.001	9.23077	2.5	99.86	1250.26	0.5	1.64103	1.64103	14.359	3.69231	9.23077	83.3846	3.07692	40	0.717949	12	4	8.20513	3.28205	144.308	21.3333	29.9487	55.6923	6.10256	22.0513	3.91795	0.584615	3.62051	0.594872	3.49744
S1800011536	SVASJ290	144.3	144.6	545258	6.73042e+06	44.2153	Dacite A	SC		79.4376	12.0757	2.44376	1.67689	0.296524	0.214724	3.41513	0.173824	0.0204499	0.0306748	0.001	4.08998	2.2	99.92	680.982	2.04499	2.45399	0.715746	12.7812	3.37423	7.77096	71.3701	3.06748	9.40695	0.715746	11.9632	4.39673	9.20245	4.60123	132.106	15.7464	28.6299	53.7832	5.23517	18.6094	3.21063	0.470348	2.69939	0.449898	2.59714
S1700016216	SVASJ279	34.4	34.65	545287	6.73057e+06	128.586	Dacite A	SC	Musc-q-cord-chl (4)	70.2114	15.0827	3.59012	7.73498	0.209336	0.418673	2.22943	0.397739	0.0628009	0.0523341	0.001	20.9336	4.3	99.84	332.845	0.5	1.36069	1.04668	16.6422	5.12874	17.5843	35.6919	3.14005	11.8275	1.25602	14.5489	6.48943	4	4.50073	183.379	32.9705	38.3086	75.4658	8.40486	30.1444	6.16496	0.994348	5.58928	0.88968	5.74628
S1800011547	SVASJ288	243.05	243.35	545399	6.7305e+06	-32.6026	Dacite A	SC	qtz-porphyry	76.6564	13.0453	2.61317	3.75514	0.123457	0.174897	3.19959	0.185185	0.0308642	0.0308642	0.001	5.14403	2.8	99.9	510.288	2.05761	2.26337	0.617284	10.2881	3.7037	8.23045	61.7284	2.05761	6.27572	0.720165	12.3457	5.34979	14.4033	5.55556	137.654	17.5926	32.716	61.5226	5.96708	19.4444	3.55967	0.298354	3.28189	0.504115	3.09671
S1800011573	SVASJ265	229.3	229.7	545168	6.7307e+06	-18.7013	Dacite A	SC	ser-cord + phlog? Alt.	74.4041	13.9689	2.98446	4.93264	0.0725389	0.165803	2.95337	0.227979	0.0621762	0.0518135	0.001	8.29016	3.5	99.82	368.912	5.18135	2.48705	1.03627	13.5751	3.93782	8.29016	48.2902	2.07254	7.04663	0.621762	10.3627	3.93782	4	1.96891	141.451	20.7254	28.8083	57.7202	5.77202	20.4145	3.73057	0.673575	3.58549	0.528497	3.34715
S1600040375	SVASJ280	186.85	187.05	545394	6.73054e+06	34.525	Dacite B	SC		78.278	11.9108	2.34178	0.504694	0.898355	5.47088	0.323004	0.161502	0.0302816	0.0403755	0.001	9.08449	0.8	99.87	600.585	2.01877	1.91784	0.05	9.69012	4.64318	9.48824	5.55163	2.01877	117.594	0.80751	11.9108	4.34037	8.0751	0.504694	170.889	24.3262	32.0985	60.5632	6.79318	23.7206	4.43121	0.62582	4.01736	0.635914	4.04764
S1800011540	SVASJ290	412.6	412.9	545134	6.73055e+06	-155.409	Dacite B	SC	ser-cord alt.	77.9218	13.035	2.31481	2.82922	0.0720165	0.185185	3.17901	0.257202	0.0308642	0.0205761	0.001	9.25926	2.8	99.89	697.531	3.08642	1.64609	1.85185	15.6379	5.34979	12.4486	66.1523	3.08642	8.23045	0.925926	11.5226	4.52675	4	4.52675	193.724	41.6667	37.1399	77.6749	8.35391	33.5391	6.59465	0.709877	6.46091	1.08025	7.28395
S1600040383	SVASJ281	161.65	161.9	545293	6.73056e+06	36.6885	Dacite C	SC	Sediment?	71.2923	13.6923	4.93333	4.5641	0.625641	1.98974	2.24615	0.389744	0.0923077	0.0615385	0.001	14.359	2.4	99.9	812.308	2.05128	8.20513	1.4359	13.9487	2.87179	7.28205	48.9231	2.05128	35.8974	0.717949	12.7179	4.51282	68.7179	1.64103	103.282	19.3846	35.5897	63.6923	6.90256	23.5897	4	0.728205	3.55897	0.523077	3.16923
S1700016217	SVASJ279	53.15	53.4	545279	6.73058e+06	114.153	Dacite C	SC	chl-musc-cord (4)	69.8243	13.6972	5.39523	7.60142	0.292765	0.230029	2.33166	0.407779	0.115015	0.0731911	0.001	13.5926	4.2	99.84	524.885	0.5	8.99205	1.35926	14.9519	3.45044	6.48264	40.3597	2.09118	7.94647	0.522794	11.5015	5.22794	60.6441	0.83647	113.133	18.6115	31.6813	56.4617	5.81347	20.389	3.43998	0.752823	3.27269	0.501882	3.08448
S1700016222	SVASJ279	12.35	12.6	545297	6.73056e+06	145.657	Dacite C	SC	Chl > musc-cord (4)	70.3499	13.7023	5.83812	7.13316	0.240209	0.18799	1.82768	0.511749	0.114883	0.0208877	0.001	28.1984	4.1	99.85	266.319	1.04439	2.29765	0.626632	17.5457	4.07311	8.66841	33.2115	3.13316	4.07311	0.73107	10.1305	4.49086	4	1.56658	141.201	29.5561	29.5561	58.0679	6.59008	25.483	4.93995	1.16971	4.80418	0.793734	5.07572
S1800011559	SVASJ281	291	291.4	545234	6.73063e+06	-56.4834	Mafic	SC	mod. Chl-ser alt.	56.0986	15.3183	12.9261	7.09446	3.8809	1.93018	1.2731	0.882957	0.205339	0.13347	0.001	34.9076	2.6	99.8	400.411	2.05339	26.8994	1.84805	15.8111	1.64271	3.6961	30.2875	0.5	126.694	0.308008	4.51745	1.64271	266.94	0.718686	67.3511	18.0698	16.0164	30.6982	3.56263	12.8337	3.03901	0.821355	3.01848	0.482546	3.32649
[truncated: 21 more columns]

## Sheet: LA with plots
Sample	Hole ID	From	To	X	Y	Z	Chemoclassification	Rock type	Logged alteration	SiO2_pct	Al2O3_pct	Fe2O3_pct	MgO_pct	CaO_pct	Na2O_pct	K2O_pct	TiO2_pct	P2O5_pct	MnO_pct	Cr2O3_pct	Sc_ppm	LOI_pct	Sum_pct	Ba_ppm	Be_ppm	Co_ppm	Cs_ppm	Ga_ppm	Hf_ppm	Nb_ppm	Rb_ppm	Sn_ppm	Sr_ppm	Ta_ppm	Th_ppm	U_ppm	V_ppm	W_ppm	Zr_ppm	Y_ppm	La_ppm	Ce_ppm	Pr_ppm	Nd_ppm	Sm_ppm	Eu_ppm	Gd_ppm	Tb_ppm	Dy_ppm
S1700016221	SVASJ279	104.75	104.95	545256	6.7306e+06	74.9075	Dacite A	Feldspar-phyric metavolcanic rock	chl >> cord (1-2)	73.064	12.4783	4.62198	2.38751	2.88746	2.63238	1.45903	0.265279	0.0408122	0.0816243	<0.002	15.3046	1.9	99.91	729.517	<1	0.816243	0.918274	16.0188	3.97919	7.44822	32.8538	2.04061	138.047	0.612182	8.87665	3.46903	<8	<0.5	143.863	30.099	28.7726	58.2594	6.45852	24.5893	4.95868	1.09173	4.6832	0.765228	5.18314
S1700016223	SVASJ279	115.7	115.9	545252	6.73061e+06	66.6453	Dacite A	Feldspar-phyric metavolcanic rock	Least altered	75.3523	12.5013	2.64625	1.95681	1.57153	4.52195	0.851668	0.263611	0.0506945	0.0506945	<0.002	8.11112	1.3	99.93	1758.09	<1	2.12917	0.101389	11.1528	4.05556	7.80696	10.8486	2.02778	112.035	0.709723	14.6	6.4889	21.2917	<0.5	139.309	20.6834	30.0112	55.6626	5.93126	21.2917	3.7007	0.679306	3.37625	0.567779	3.4675
S1700016225	SVASJ279	157	157.3	545233	6.73063e+06	35.9762	Dacite A	SC	Musc-chl (1)	72.0348	12.3926	5.18405	3.54806	2.38241	2.12679	1.76892	0.286299	0.0613497	0.132924	<0.002	16.3599	2.1	99.9	592.025	1.02249	2.04499	1.43149	14.3149	3.88548	6.95297	46.0123	1.02249	70.0409	0.511247	8.28221	3.27198	<8	<0.5	131.186	26.6871	28.2209	53.5787	6.16564	23.0061	4.45808	1.03272	4.33538	0.715746	4.5501
S1700016240	SVASJ279	321.5	321.9	545158	6.73072e+06	-77.4602	Dacite A	Feldspar-phyric metavolcanic rock	musc-bt-q (1-2)	73.9891	13.7788	2.61828	1.28387	1.13223	3.48767	3.27537	0.181965	0.0404367	0.0606551	<0.002	7.07643	1	99.92	1111	3.03275	1.92074	0.909826	13.8496	4.24586	7.48079	59.2398	2.02184	107.663	0.707643	11.7266	4.34695	18.1965	2.83057	153.356	20.2184	30.1254	56.4092	5.91387	21.7347	3.83138	0.667206	3.55843	0.545896	3.60898
S1700016241	SVASJ279	344.2	344.5	545147	6.73074e+06	-92.2065	Dacite A	Feldspar-phyric metavolcanic rock	musc-bt-q (1-2)	75.4528	13.5384	2.46889	1.33563	1.38622	3.44025	1.9832	0.182131	0.0303552	0.0404735	<0.002	7.08287	1.1	99.93	877.264	1.01184	1.72013	0.809471	13.761	4.35091	7.28524	56.9665	2.02368	129.212	0.607103	12.1421	4.04735	9.10655	2.02368	163.614	18.719	29.6469	56.0559	5.89902	20.0344	3.84499	0.68805	3.42001	0.546393	3.36942
S1700016242	SVASJ279	374.35	374.65	545134	6.73075e+06	-111.714	Dacite A	Feldspar-phyric metavolcanic rock	fsp (1) Least altered	75.6563	12.2375	3.09976	0.52504	1.37318	3.13005	3.53393	0.191842	0.0302908	0.100969	<0.002	9.08724	0.9	99.94	978.393	1.00969	1.61551	0.403877	12.3183	4.34168	7.97658	70.8805	2.01939	94.0024	0.706785	11.8134	4.13974	17.1648	0.605816	160.44	23.6268	30.9976	58.0574	6.35097	21.6074	4.19023	0.737076	3.90751	0.615913	4.02868
S1700016243	SVASJ279	406.2	406.5	545120	6.73077e+06	-132.048	Dacite A	Feldspar-phyric metavolcanic rock	musc >> chl (1)	75.0305	13.1547	3.20747	1.47178	1.00487	3.51198	2.23305	0.203004	0.0304507	0.091352	<0.002	10.1502	1.4	99.92	883.069	2.03004	2.33455	0.812018	15.4283	4.26309	9.0337	40.9054	2.03004	108.81	0.91352	11.2667	3.55258	<8	2.03004	162.81	24.5635	30.3492	57.0443	6.46569	23.1425	4.21234	0.791717	3.90784	0.619164	3.80633
S1700016244	SVASJ279	445	445.3	545104	6.7308e+06	-155.909	Dacite A	Feldspar-phyric metavolcanic rock	q-bt (1-2)	75.9252	12.4598	3.06718	0.532985	1.04586	4.3041	2.24256	0.211183	0.0402253	0.0703942	<0.002	10.0563	0.5	99.94	625.503	3.01689	1.60901	2.91633	12.0676	4.52534	8.34674	42.5382	2.01126	137.47	0.804505	10.9614	4.22365	10.0563	0.905068	156.175	22.5261	30.5712	59.4328	6.36565	23.2301	4.34433	0.734111	4.0527	0.65366	3.90185
S1800011545	SVASJ290	600.95	601.25	545041	6.73066e+06	-278.631	Dacite A	Feldspar-phyric metavolcanic rock	weak. Phlog alt or primary bt?	72.8931	13.5081	2.72177	0.745968	1.11895	2.43952	5.92742	0.231855	0.0604839	0.0806452	<0.002	5.04032	0.8	99.93	1653.23	2.01613	2.62097	0.705645	11.0887	3.93145	8.36694	66.3306	2.01613	108.77	0.907258	19.7581	8.66935	21.1694	0.806452	131.754	17.7419	33.4677	58.6694	5.65524	18.3468	3.34677	0.534274	2.78226	0.46371	2.95363
S1800011548	SVASJ288	348	348.3	545364	6.73056e+06	-112.3	Dacite A	Feldspar-phyric metavolcanic rock	mag-rich	74.5482	13.3096	3.28934	0.873096	1.58376	4.4467	1.46193	0.243655	0.0507614	0.0609137	0.00304569	11.1675	1.5	99.91	680.203	2.03046	3.65482	1.01523	10.5584	4.46701	8.32487	42.5381	1.01523	168.426	0.609137	13.9086	5.17766	24.3655	0.71066	155.939	25.6853	36.9543	68.4264	7.36041	26.1929	4.84264	0.903553	4.31472	0.690355	4.30457
S1800011575	SVASJ265	316.2	316.55	545121	6.73075e+06	-79.0497	Dacite A	Feldspar-phyric metavolcanic rock	least altered. bt wisps -> pumice?	75.241	13.0522	2.26908	0.361446	1.54618	3.39357	3.6747	0.200803	0.0401606	0.0401606	<0.002	10.0402	0.4	99.93	824.297	1.00402	1.30522	0.301205	13.1526	4.51807	8.83534	62.8514	2.00803	111.948	0.702811	11.1446	4.71888	<8	0.803213	162.45	25	31.3253	59.8394	6.35542	23.494	4.29719	0.813253	3.8253	0.60241	4.01606
S1700016248	SVASJ279	70.85	71.15	545271	6.73059e+06	100.585	Dacite C	Feldspar-phyric metavolcanic rock	chl-phlog >> cord (3)	69.5275	13.7055	4.72497	3.56159	2.09205	2.786	2.82682	0.398	0.122461	0.0918461	<0.002	12.2461	1.9	99.89	1290.95	1.02051	8.26615	1.83692	12.8585	3.36769	6.12307	58.9856	1.02051	128.278	0.714359	12.1441	4.79641	51.0256	0.510256	110.011	18.8795	31.84	56.8425	6.08225	21.941	3.79631	0.653128	3.3881	0.510256	3.184
S1800011551	SVASJ288	499.7	500	545315	6.73065e+06	-224.273	Mafic	Metamafite	amph-rich	56.8681	15.2568	12.1047	3.53474	5.07553	4.89426	0.422961	1.03726	0.382679	0.251762	<0.002	33.2326	0.7	99.86	325.277	<1	20.2417	0.20141	14.9043	2.31621	5.43807	6.64653	1.00705	133.434	0.40282	4.93454	2.0141	160.121	0.805639	86.1027	19.1339	19.5368	42.6989	4.99496	18.8318	4.27996	1.07754	3.78651	0.574018	3.39376
[truncated: 28 more columns]

## Sheet: LA with plots w. Falun
Sample	Hole ID	From	To	X	Y	Z	Chemoclassification	Rock type	Logged alteration	SiO2_pct	Al2O3_pct	Fe2O3_pct	MgO_pct	CaO_pct	Na2O_pct	K2O_pct	TiO2_pct	P2O5_pct	MnO_pct	Cr2O3_pct	Sc_ppm	LOI_pct	Sum_pct	Ba_ppm	Be_ppm	Co_ppm	Cs_ppm	Ga_ppm	Hf_ppm	Nb_ppm	Rb_ppm	Sn_ppm	Sr_ppm	Ta_ppm	Th_ppm	U_ppm	V_ppm	W_ppm	Zr_ppm	Y_ppm	La_ppm	Ce_ppm	Pr_ppm	Nd_ppm	Sm_ppm	Eu_ppm	Gd_ppm	Tb_ppm	Dy_ppm
S1700016221	SVASJ279	104.75	104.95	545256	6.7306e+06	74.9075	Dacite A	Feldspar-phyric metavolcanic rock	chl >> cord (1-2)	73.064	12.4783	4.62198	2.38751	2.88746	2.63238	1.45903	0.265279	0.0408122	0.0816243	<0.002	15.3046	1.9	99.91	729.517	<1	0.816243	0.918274	16.0188	3.97919	7.44822	32.8538	2.04061	138.047	0.612182	8.87665	3.46903	<8	<0.5	143.863	30.099	28.7726	58.2594	6.45852	24.5893	4.95868	1.09173	4.6832	0.765228	5.18314
S1700016223	SVASJ279	115.7	115.9	545252	6.73061e+06	66.6453	Dacite A	Feldspar-phyric metavolcanic rock	Least altered	75.3523	12.5013	2.64625	1.95681	1.57153	4.52195	0.851668	0.263611	0.0506945	0.0506945	<0.002	8.11112	1.3	99.93	1758.09	<1	2.12917	0.101389	11.1528	4.05556	7.80696	10.8486	2.02778	112.035	0.709723	14.6	6.4889	21.2917	<0.5	139.309	20.6834	30.0112	55.6626	5.93126	21.2917	3.7007	0.679306	3.37625	0.567779	3.4675
S1700016225	SVASJ279	157	157.3	545233	6.73063e+06	35.9762	Dacite A	SC	Musc-chl (1)	72.0348	12.3926	5.18405	3.54806	2.38241	2.12679	1.76892	0.286299	0.0613497	0.132924	<0.002	16.3599	2.1	99.9	592.025	1.02249	2.04499	1.43149	14.3149	3.88548	6.95297	46.0123	1.02249	70.0409	0.511247	8.28221	3.27198	<8	<0.5	131.186	26.6871	28.2209	53.5787	6.16564	23.0061	4.45808	1.03272	4.33538	0.715746	4.5501
S1700016240	SVASJ279	321.5	321.9	545158	6.73072e+06	-77.4602	Dacite A	Feldspar-phyric metavolcanic rock	musc-bt-q (1-2)	73.9891	13.7788	2.61828	1.28387	1.13223	3.48767	3.27537	0.181965	0.0404367	0.0606551	<0.002	7.07643	1	99.92	1111	3.03275	1.92074	0.909826	13.8496	4.24586	7.48079	59.2398	2.02184	107.663	0.707643	11.7266	4.34695	18.1965	2.83057	153.356	20.2184	30.1254	56.4092	5.91387	21.7347	3.83138	0.667206	3.55843	0.545896	3.60898
S1700016241	SVASJ279	344.2	344.5	545147	6.73074e+06	-92.2065	Dacite A	Feldspar-phyric metavolcanic rock	musc-bt-q (1-2)	75.4528	13.5384	2.46889	1.33563	1.38622	3.44025	1.9832	0.182131	0.0303552	0.0404735	<0.002	7.08287	1.1	99.93	877.264	1.01184	1.72013	0.809471	13.761	4.35091	7.28524	56.9665	2.02368	129.212	0.607103	12.1421	4.04735	9.10655	2.02368	163.614	18.719	29.6469	56.0559	5.89902	20.0344	3.84499	0.68805	3.42001	0.546393	3.36942
S1700016242	SVASJ279	374.35	374.65	545134	6.73075e+06	-111.714	Dacite A	Feldspar-phyric metavolcanic rock	fsp (1) Least altered	75.6563	12.2375	3.09976	0.52504	1.37318	3.13005	3.53393	0.191842	0.0302908	0.100969	<0.002	9.08724	0.9	99.94	978.393	1.00969	1.61551	0.403877	12.3183	4.34168	7.97658	70.8805	2.01939	94.0024	0.706785	11.8134	4.13974	17.1648	0.605816	160.44	23.6268	30.9976	58.0574	6.35097	21.6074	4.19023	0.737076	3.90751	0.615913	4.02868
S1700016243	SVASJ279	406.2	406.5	545120	6.73077e+06	-132.048	Dacite A	Feldspar-phyric metavolcanic rock	musc >> chl (1)	75.0305	13.1547	3.20747	1.47178	1.00487	3.51198	2.23305	0.203004	0.0304507	0.091352	<0.002	10.1502	1.4	99.92	883.069	2.03004	2.33455	0.812018	15.4283	4.26309	9.0337	40.9054	2.03004	108.81	0.91352	11.2667	3.55258	<8	2.03004	162.81	24.5635	30.3492	57.0443	6.46569	23.1425	4.21234	0.791717	3.90784	0.619164	3.80633
S1700016244	SVASJ279	445	445.3	545104	6.7308e+06	-155.909	Dacite A	Feldspar-phyric metavolcanic rock	q-bt (1-2)	75.9252	12.4598	3.06718	0.532985	1.04586	4.3041	2.24256	0.211183	0.0402253	0.0703942	<0.002	10.0563	0.5	99.94	625.503	3.01689	1.60901	2.91633	12.0676	4.52534	8.34674	42.5382	2.01126	137.47	0.804505	10.9614	4.22365	10.0563	0.905068	156.175	22.5261	30.5712	59.4328	6.36565	23.2301	4.34433	0.734111	4.0527	0.65366	3.90185
S1800011545	SVASJ290	600.95	601.25	545041	6.73066e+06	-278.631	Dacite A	Feldspar-phyric metavolcanic rock	weak. Phlog alt or primary bt?	72.8931	13.5081	2.72177	0.745968	1.11895	2.43952	5.92742	0.231855	0.0604839	0.0806452	<0.002	5.04032	0.8	99.93	1653.23	2.01613	2.62097	0.705645	11.0887	3.93145	8.36694	66.3306	2.01613	108.77	0.907258	19.7581	8.66935	21.1694	0.806452	131.754	17.7419	33.4677	58.6694	5.65524	18.3468	3.34677	0.534274	2.78226	0.46371	2.95363
S1800011548	SVASJ288	348	348.3	545364	6.73056e+06	-112.3	Dacite A	Feldspar-phyric metavolcanic rock	mag-rich	74.5482	13.3096	3.28934	0.873096	1.58376	4.4467	1.46193	0.243655	0.0507614	0.0609137	0.00304569	11.1675	1.5	99.91	680.203	2.03046	3.65482	1.01523	10.5584	4.46701	8.32487	42.5381	1.01523	168.426	0.609137	13.9086	5.17766	24.3655	0.71066	155.939	25.6853	36.9543	68.4264	7.36041	26.1929	4.84264	0.903553	4.31472	0.690355	4.30457
S1800011575	SVASJ265	316.2	316.55	545121	6.73075e+06	-79.0497	Dacite A	Feldspar-phyric metavolcanic rock	least altered. bt wisps -> pumice?	75.241	13.0522	2.26908	0.361446	1.54618	3.39357	3.6747	0.200803	0.0401606	0.0401606	<0.002	10.0402	0.4	99.93	824.297	1.00402	1.30522	0.301205	13.1526	4.51807	8.83534	62.8514	2.00803	111.948	0.702811	11.1446	4.71888	<8	0.803213	162.45	25	31.3253	59.8394	6.35542	23.494	4.29719	0.813253	3.8253	0.60241	4.01606
S1700016248	SVASJ279	70.85	71.15	545271	6.73059e+06	100.585	Dacite C	Feldspar-phyric metavolcanic rock	chl-phlog >> cord (3)	69.5275	13.7055	4.72497	3.56159	2.09205	2.786	2.82682	0.398	0.122461	0.0918461	<0.002	12.2461	1.9	99.89	1290.95	1.02051	8.26615	1.83692	12.8585	3.36769	6.12307	58.9856	1.02051	128.278	0.714359	12.1441	4.79641	51.0256	0.510256	110.011	18.8795	31.84	56.8425	6.08225	21.941	3.79631	0.653128	3.3881	0.510256	3.184
S1800011551	SVASJ288	499.7	500	545315	6.73065e+06	-224.273	Mafic	Metamafite	amph-rich	56.8681	15.2568	12.1047	3.53474	5.07553	4.89426	0.422961	1.03726	0.382679	0.251762	<0.002	33.2326	0.7	99.86	325.277	<1	20.2417	0.20141	14.9043	2.31621	5.43807	6.64653	1.00705	133.434	0.40282	4.93454	2.0141	160.121	0.805639	86.1027	19.1339	19.5368	42.6989	4.99496	18.8318	4.27996	1.07754	3.78651	0.574018	3.39376
FALUN DATA Kampmann et al. (2018)
9/13-4				533876	6718137	108		Felsic volcanic or sub-volcanic rock		77.2454	12.5222	1.65957	0.311798	1.77021	4.07349	1.6294	0.120696		0.020116																				148.858
PNY120185A				533762	6717000			Felsic volcanic or sub-volcanic rock		70.9198	15.059	4.60928	1.77045	1.55678	4.884	1.37363	0.34595		0.0814																				119.047
CMR120073A				523370	6715960			Felsic volcanic or sub-volcanic rock		73.8192	12.7257	2.65668	1.24722	1.0647	2.61612	4.87734	0.14196		0.04056																				174.408
TKN121036F				533730	6716985	174		GDG intrusive rock suite		75.1801	14.3637	3.34134	1.17151	0.651968	5.175	1.40581	0.295423		0.040748																				146.693
TKN13/43A				536111	6720569	173		GDG intrusive rock suite		75.3834	12.9502	3.06371	0.372886	2.1063	4.05136	2.62028	0.211638		0.080624																				169.31
CMR120026A				521448	6718566			GDG intrusive rock suite		72.4672	13.0886	3.36563	0.323424	0.778239	3.83055	4.14387	0.222354		0.050535																				190.012
CMR120053A				524925	6713797			GDG intrusive rock suite		77.2358	12.4525	2.26867	0.423486	0.685644	4.20461	3.17614	0.141162		0.020166																				210.735
CMR120060A				523642	6718643			GDG intrusive rock suite		73.8322	13.6539	3.42865	0.35399	0.96083	4.20742	4.03549	0.232622		0.040456																				191.155
PNY120196A				532643	6715872			GDG intrusive rock suite		77.6864	11.1196	2.03273	0.120756	0.422646	3.9447	3.38117	0.090567		0.040252																				227.424
PNY120196B				532643	6715872			GDG intrusive rock suite		78.5988	11.3576	2.02025	0.050255	0.462346	4.03045	3.89979	0.090459		0.050255																				249.265
PNY130189A				537580	6721641			GDG intrusive rock suite		75.6963	12.5322	2.74802	0.261716	1.60049	3.76468	2.97954	0.191254		0.040264																				165.082
[truncated: 28 more columns]

## Sheet: Formulas
Formula	R2
Al2O3 = -0.0191Zr + 16.107	0.4858
TiO2 = -1.105ln(Zr) + 5.7669	0.8184
SiO2 = 14.574ln(Zr) + 0.2586	0.6238
Fe2O3T = 2566.2Zr-1.327	0.7094
MgO = 44.042e-0.025Zr	0.6005
CaO = 9.973e-0.013Zr	0.6453
Na2O = 0.0013Zr + 3.5357	0.0033
K2O = 0.0181Zr-0.1803	0.2341
MnO = 199.9Zr-1.609	0.6695
Zr above refers to reconstituted Zr (from Zr-Al2O3)
Reconstituted Zr = 16.107/((Al2O3/Zr)+0.0191)

## Sheet: Mass change
Sample	Hole ID	From	To	X	Y	Z	Chemoclassification	Rock type	Logged alteration	SiO2_pct	Fe2O3_pct	MgO_pct	CaO_pct	Na2O_pct	K2O_pct	MnO_pct	TiO2	Zr/TiO2	Zr precursor	Al2O3/Zr	Δ CaO+Na2O	Δ Fe2O3T+MgO
S1700016235	SVASJ279	262.05	262.35	545185	6.73069e+06	-37.4894	Dacite A	Feldspar-phyric metavolcanic rock	q-ser > chl (3) grt	1.59456	-0.57379	-0.479776	1.33398	-0.502017	-1.74762	0.0241619	-0.0387965	0.0665909	146.217	0.091058	0.831967	-1.05357
S1700016220	SVASJ279	93.35	93.6	545261	6.7306e+06	83.5031	Dacite A	Feldspar-phyric metavolcanic rock	Chl (1)	0.191994	0.0785583	-0.335901	0.419039	0.295349	-1.07269	0.00909317	0.0232503	0.0666087	153.208	0.0860313	0.714388	-0.257343
S1800011548	SVASJ288	348	348.3	545364	6.73056e+06	-112.3	Dacite A	Feldspar-phyric metavolcanic rock	mag-rich	0.0328633	0.0488474	-0.069011	0.222619	0.661098	-1.16514	-4.1707e-05	0.0413518	0.064	154.205	0.0853516	0.883716	-0.0201636
S1700016223	SVASJ279	115.7	115.9	545252	6.73061e+06	66.6453	Dacite A	Feldspar-phyric metavolcanic rock	Least altered	6.96144	-0.572509	0.989632	0.212888	1.07568	-1.59358	-0.0105491	0.0349898	0.0528462	147.991	0.089738	1.28857	0.417124
S1700016244	SVASJ279	445	445.3	545104	6.7308e+06	-155.909	Dacite A	Feldspar-phyric metavolcanic rock	q-bt (1-2)	4.7059	0.219932	-0.19447	-0.109209	0.74179	-0.429032	0.018232	0.081233	0.0739524	162.893	0.0797811	0.632581	0.0254618
S1700016241	SVASJ279	344.2	344.5	545147	6.73074e+06	-92.2065	Dacite A	Feldspar-phyric metavolcanic rock	musc-bt-q (1-2)	-1.12152	-0.711851	0.446203	0.063571	-0.415923	-0.76525	-0.0187551	0.00437088	0.0898333	158.151	0.0827458	-0.352352	-0.265648
S1700016221	SVASJ279	104.75	104.95	545256	6.7306e+06	74.9075	Dacite A	Feldspar-phyric metavolcanic rock	chl >> cord (1-2)	3.79661	1.62892	1.54496	1.67524	-0.948862	-1.03082	0.0247763	0.066466	0.0542308	152.186	0.0867376	0.726383	3.17388
S1800011575	SVASJ265	316.2	316.55	545121	6.73075e+06	-79.0497	Dacite A	Feldspar-phyric metavolcanic rock	least altered. bt wisps -> pumice?	0.615135	-0.739461	-0.407575	0.32701	-0.362766	0.912475	-0.0156574	0.0548763	0.0809	161.967	0.0803461	-0.0357562	-1.14704
S1700016243	SVASJ279	406.2	406.5	545120	6.73077e+06	-132.048	Dacite A	Feldspar-phyric metavolcanic rock	musc >> chl (1)	-0.0316397	0.15653	0.6754	-0.231054	-0.267305	-0.526598	0.0343617	0.0507002	0.0802	161.234	0.080798	-0.498359	0.83193
S1700016242	SVASJ279	374.35	374.65	545134	6.73075e+06	-111.714	Dacite A	Feldspar-phyric metavolcanic rock	fsp (1) Least altered	4.62542	0.42305	-0.0933694	0.335269	-0.46051	0.843403	0.0542065	0.102801	0.0836316	168.882	0.0762744	-0.125241	0.329681
S1600040368	SVASJ280	234.1	234.35	545370	6.73057e+06	5.02607	Dacite A	Metamafite		8.44989	4.18677	2.02088	0.391375	-1.05897	-1.63567	0.0660863	0.327044	0.0466061	176.348	0.0722367	-0.667594	6.20766
S1700016240	SVASJ279	321.5	321.9	545158	6.73072e+06	-77.4602	Dacite A	Feldspar-phyric metavolcanic rock	musc-bt-q (1-2)	-1.74427	-0.86413	0.14447	-0.36792	-0.365663	0.661956	-0.00603457	-0.0707501	0.0842778	147.841	0.0898484	-0.733583	-0.71966
S1700016225	SVASJ279	157	157.3	545233	6.73063e+06	35.9762	Dacite A	SC	Musc-chl (1)	5.4117	2.02452	2.56541	0.997648	-1.42074	-0.474381	0.0747447	0.0174859	0.0458214	141.829	0.0944661	-0.423093	4.58993
S1800011546	SVASJ288	93.55	93.95	545450	6.73042e+06	84.7237	Dacite A	SC	str. Ser-phlog alt.	13.9238	-0.0242133	0.358434	-0.942219	-1.14077	-0.150662	-0.0393466	-0.163063	0.0812	136.843	0.0986043	-2.08299	0.334221
S1800011545	SVASJ290	600.95	601.25	545041	6.73066e+06	-278.631	Dacite A	Feldspar-phyric metavolcanic rock	weak. Phlog alt or primary bt?	1.79997	-1.18531	-0.857162	-0.658401	-1.2558	3.7412	0.00405355	-0.134748	0.0568261	132.432	0.102525	-1.9142	-2.04248
S1800011567	SVASJ265	74.2	74.5	545249	6.73063e+06	92.5761	Dacite A	CSBC	ser-cord-chl	0.831028	1.4471	4.4275	-0.598037	-1.49047	-0.739979	-0.00822448	0.0643354	0.0551538	152.469	0.0865411	-2.0885	5.8746
S1800011574	SVASJ265	247.6	248	545158	6.73071e+06	-31.4135	Dacite A	CSBC	phlog-amph-qtz alt.	-14.4479	17.3736	2.6393	-0.229419	-3.40904	-2.16601	0.0531716	-0.00822552	0.084	155.14	0.0847222	-3.63846	20.0129
S1600040371	SVASJ280	210.9	211.1	545382	6.73055e+06	19.4335	Dacite A	SC		15.2911	-0.0484362	-0.270175	-1.38866	-2.68081	1.78052	-0.037628	-0.137223	0.0760625	138.39	0.0972884	-4.06947	-0.318612
S1800011539	SVASJ290	296.6	296.85	545189	6.73049e+06	-72.703	Dacite A	Biotite schist	int. Phlog alt.	3.99245	1.36116	4.23455	-0.686874	-2.70674	-0.677252	-0.0156901	0.0765719	0.0607083	156.736	0.0836651	-3.39361	5.59571
S1600040382	SVASJ281	165.2	165.4	545291	6.73056e+06	34.0959	Dacite A	SC	Coherent?	31.8123	-1.30141	2.36019	-1.93677	-2.45624	0.744683	-0.0491082	-0.322289	0.047	111.365	0.125532	-4.39302	1.05879
S1800011562	SVASJ269	32.6	32.9	545213	6.73066e+06	112.132	Dacite A	SC	ser-chl schist	-2.29033	1.14199	3.69381	-0.914975	-2.92686	-0.0316942	0.000971576	0.0793426	0.0566667	154.969	0.0848366	-3.84184	4.83579
S1800011544	SVASJ290	525.4	525.7	545079	6.73062e+06	-230.64	Dacite A	SC	str. Ser-phlog+Si alt.	-2.34592	-1.32274	4.20978	-1.28174	-2.6541	1.31655	-0.020868	-0.0791626	0.0611739	139.829	0.096091	-3.93584	2.88704
S1700016239	SVASJ279	311.35	311.65	545162	6.73072e+06	-70.7664	Dacite A	CSBC	phlog-amph-gt-cord (4) po-py > sph	-29.9741	21.5408	7.95786	-0.062915	-3.64494	-0.605998	1.07752	-0.0960264	0.090375	146.281	0.0910097	-3.70785	29.4987
S1700016218	SVASJ279	57.65	57.9	545277	6.73058e+06	110.701	Dacite A	Metamafite	cord-chl > musc (4)	-1.4682	0.0697242	3.77045	-1.51657	-2.90103	0.130382	-0.0221865	-0.0442602	0.0489286	137.601	0.0979562	-4.4176	3.84017
S1800011536	SVASJ290	144.3	144.6	545258	6.73042e+06	44.2153	Dacite A	SC		14.7787	-0.756571	0.698335	-1.17242	-3.48827	1.31009	-0.0321574	-0.070103	0.076	145.753	0.0914087	-4.66069	-0.0582358
S1700016216	SVASJ279	34.4	34.65	545287	6.73057e+06	128.586	Dacite A	SC	Musc-q-cord-chl (4)	-13.2769	0.0331513	5.87497	-1.08213	-3.37946	-0.764114	-0.0120677	0.17843	0.0461053	158.926	0.0822489	-4.46159	5.90812
S1700016227	SVASJ279	189.35	189.6	545219	6.73065e+06	12.8786	Dacite A	CSBC	Amph ± cord-phlog (3-4)	3.48839	12.845	9.86348	-0.68789	-3.7212	-1.8112	0.0446012	0.0678579	0.076	161.976	0.0803406	-4.40909	22.7085
S1800011547	SVASJ288	243.05	243.35	545399	6.7305e+06	-32.6026	Dacite A	SC	qtz-porphyry	6.34314	-0.907485	2.57625	-1.45893	-3.53987	0.907884	-0.0375435	-0.104682	0.0743333	141.453	0.0947683	-4.99879	1.66877
S1800011537	SVASJ290	206.6	206.95	545230	6.73045e+06	-4.53301	Dacite A	CSBC	int. ser-cord-phlog-serp alt.	22.4684	-2.01073	2.1514	-2.0624	-3.47531	1.47021	-0.0783418	-0.309385	0.0712857	119.906	0.11523	-5.53772	0.140662
S1800011573	SVASJ265	229.3	229.7	545168	6.7307e+06	-18.7013	Dacite A	SC	ser-cord + phlog? Alt.	-0.0384925	-0.877061	3.32041	-1.61747	-3.55317	0.560118	-0.0231403	-0.112727	0.0620455	136.668	0.0987546	-5.17064	2.44334
S1800011553	SVASJ288	613.1	613.4	545278	6.73072e+06	-303.15	Dacite A	CSBC	ser-chl-cord-phlog alt.	-1.11418	5.54577	7.87021	-1.36196	-3.57283	-1.15791	0.0416453	0.0356119	0.0478929	145.048	0.0919463	-4.93479	13.416
S1800011568	SVASJ265	121.45	121.8	545226	6.73065e+06	56.9786	Dacite A	CSBC	Ser-chl>phlog alt.	1.724	0.91622	3.72737	-1.15413	-3.60185	-0.041405	-0.0133395	0.0608959	0.0823684	163.164	0.0796166	-4.75598	4.64359
S1700016238	SVASJ279	289.1	289.35	545173	6.7307e+06	-55.9072	Dacite A	CSBC	musc-phlog-cord (3-4)	0.43306	-0.264023	4.17369	-1.47858	-3.57973	0.220804	-0.00631158	-0.0530235	0.0640455	143.718	0.0929737	-5.05831	3.90966
S1600040375	SVASJ280	186.85	187.05	545394	6.73054e+06	34.525	Dacite B	SC		7.03423	-0.0973187	0.0631189	0.00995839	2.03547	-2.75997	-0.00356491	0.151227	0.105813	181.388	0.0696988	2.04543	-0.0341999
S1700016226	SVASJ279	176.6	176.8	545225	6.73064e+06	21.9248	Dacite B	CSBC	musc > chl (3-4)	10.4102	1.01365	3.21708	-0.578163	-2.08946	-1.00272	0.0344904	0.191065	0.0951765	184.303	0.0682942	-2.66762	4.23072
S1800011555	SVASJ288	642.2	642.8	545269	6.73074e+06	-322.398	Dacite B	Calc-silicate rock	si-trem-chl-phlog alt.	-4.69811	1.44083	19.4695	2.3597	-3.50553	-2.17908	0.319227	0.238504	0.0927647	190.381	0.0655041	-1.14584	20.9103
S1800011540	SVASJ290	412.6	412.9	545134	6.73055e+06	-155.409	Dacite B	SC	ser-cord alt.	-1.45691	-0.262323	2.30666	-0.814136	-3.59985	-0.134809	-0.0246046	0.257788	0.07532	186.453	0.0672862	-4.41399	2.04434
S1800011550	SVASJ288	431.9	432.25	545337	6.73061e+06	-174.814	Dacite B	CSBC	str. Ser-cord>chl alt.	10.1015	3.1576	3.99575	-0.583175	-3.67892	-0.864263	0.0298369	0.270699	0.107375	199.489	0.0616414	-4.26209	7.15335
S1700016228	SVASJ279	211.5	211.75	545209	6.73066e+06	-2.62263	Dacite B	CSBC	chl-phlog-cord (4-5)	11.1518	5.37878	12.6254	-0.372148	-3.70873	-2.50777	0.0227199	0.293841	0.0783684	192.885	0.0644056	-4.08087	18.0042
S1800011569	SVASJ265	149.7	149.95	545211	6.73067e+06	36.7281	Dacite B	CSBC	str. Cord-chl-ser-phlog alt. Trem?	-17.3097	1.07557	8.50159	-0.666241	-3.59034	-1.89218	0.0200681	0.205698	0.1039	188.789	0.0662175	-4.25658	9.57716
S1800011542	SVASJ290	448.85	449.15	545117	6.73057e+06	-179.92	Dacite B	CSBC	w. str. cg ser-phlog-serp>cord alt.	-3.13076	-0.25733	3.69243	-0.648281	-3.65605	-0.979243	-0.0200653	0.242548	0.125688	199.318	0.0617106	-4.30434	3.4351
S1700016229	SVASJ279	226.3	226.6	545202	6.73067e+06	-12.8802	Dacite B	CSBC	musc-q-cord > chl-phlog (4-5)	2.81241	0.468744	2.66075	-0.69675	-3.61972	-0.662292	-0.0183425	0.26231	0.120375	201.329	0.0609034	-4.31647	3.12949
S1800011564	SVASJ269	65.75	66.05	545195	6.73067e+06	87.5931	Dacite B	CSBC	ser-chl-cord	73.6203	4.78887	2.30163	-0.900798	-3.69174	-0.308527	0.00436648	0.0827856	0.1225	174.964	0.0729592	-4.59254	7.09051
S1800011560	SVASJ281	366.05	366.45	545201	6.73067e+06	-108.978	Dacite B	QCGA	w. mag+py	35.2888	13.2581	50.789	-0.52816	-3.54263	-2.10676	0.11806	0.177307	0.0872	179.941	0.0704128	-4.07079	64.047
S1800011549	SVASJ288	408.35	408.65	545344	6.7306e+06	-157.421	Dacite C	Biotite schist	int. Bt>cord-chl>grt	-18.8239	1.74808	1.66	0.611464	-1.38201	-0.00708967	0.0575653	0.0605713	0.0295385	130.737	0.104102	-0.770549	3.40808
S1700016248	SVASJ279	70.85	71.15	545271	6.73059e+06	100.585	Dacite C	Feldspar-phyric metavolcanic rock	chl-phlog >> cord (3)	1.80925	-0.076931	0.95783	-0.190729	-0.842503	1.03179	-0.00709964	-0.146399	0.027641	112.101	0.124583	-1.03323	0.880898
S1600040383	SVASJ281	161.65	161.9	545293	6.73056e+06	36.6885	Dacite C	SC	Sediment?	5.05338	-0.183324	1.59649	-1.86454	-1.62787	0.567679	-0.0465759	-0.211015	0.0265	106.196	0.132572	-3.49241	1.41317
S1700016217	SVASJ279	53.15	53.4	545279	6.73058e+06	114.153	Dacite C	SC	chl-musc-cord (4)	1.52091	0.746224	5.23041	-1.94193	-3.45144	0.468719	-0.0224217	-0.110446	0.0277436	114.909	0.121072	-5.39337	5.97663
S1700016222	SVASJ279	12.35	12.6	545297	6.73056e+06	145.657	Dacite C	SC	Chl > musc-cord (4)	-3.04449	2.04582	5.6316	-1.40798	-3.53135	-0.534786	-0.050982	0.18581	0.0275918	138.684	0.0970414	-4.93933	7.67742
S1600040370	SVASJ280	249.3	250.1	545362	6.73058e+06	-4.42329	Dacite C	CSBC		-16.4808	10.8888	10.1382	-1.61273	-3.60914	-1.85647	0.0586562	0.00620372	0.0297857	126.495	0.108233	-5.22187	21.0271
S1800011551	SVASJ288	499.7	500	545315	6.73065e+06	-224.273	Mafic	Metamafite	amph-rich	-10.2968	4.13522	-2.29321	1.40463	1.02186	-0.90183	0.0735845	0.0917878	0.00830097	82.0559	0.177193	2.42649	1.84201
S1600040386	SVASJ281	92.25	92.5	545323	6.73052e+06	88.1852	Mafic	Metamafite		-12.7654	2.07335	-2.26356	3.15486	-0.71466	-0.146627	0.00554178	-0.273114	0.0138769	83.6278	0.173503	2.4402	-0.190205
S1600040372	SVASJ280	225.55	225.7	545374	6.73056e+06	10.3344	Mafic	Metamafite		-23.4087	6.31536	1.37353	1.13347	-1.48384	-1.65857	0.128405	0.617262	0.0139649	134.813	0.100377	-0.350372	7.68889
S1600040381	SVASJ280	314.8	315.6	545329	6.73062e+06	-42.9729	Mafic	CSBC		-8.85766	2.88138	0.705191	0.648943	-0.986734	-0.530216	0.0289362	0.0608651	0.0204167	116.478	0.119184	-0.337791	3.58657
S1600040374	SVASJ280	331.9	332.1	545320	6.73063e+06	-52.7257	Mafic	CSBC		-10.9066	2.75132	0.288574	0.495563	-1.70636	0.875301	-0.0173037	-0.0465695	0.0158507	100.042	0.141902	-1.2108	3.03989
S1800011559	SVASJ281	291	291.4	545234	6.73063e+06	-56.4834	Mafic	SC	mod. Chl-ser alt.	-6.75332	2.5245	-1.71878	-0.501302	-1.7483	0.232725	-0.110563	-0.292072	0.00762791	65.3325	0.227439	-2.2496	0.805712
S1700016224	SVASJ279	125.6	125.8	545247	6.73061e+06	59.1996	Mafic	Metamafite	chl-epid-mag (1)	-15.759	3.24713	-0.368928	-0.827087	-2.12329	0.303219	-0.0870381	-0.234819	0.00824176	69.5767	0.2124	-2.95038	2.8782
S1700016215	SVASJ279	24.6	24.85	545291	6.73057e+06	136.166	Mafic	Metamafite	Weak	-29.3056	4.81189	3.11229	0.715668	-2.86515	0.767734	0.0443684	0.591492	0.00990845	112.708	0.12381	-2.14948	7.92418
S1800011552	SVASJ288	565.4	565.7	545294	6.73069e+06	-270.881	Mafic	CSBC	int. Ser-cord-chl alt.	-21.3822	1.22082	2.78356	-1.27759	-2.13984	-0.755295	-0.00986328	-0.095041	0.0133452	91.2787	0.15736	-3.41742	4.00437
S1600040376	SVASJ280	325.5	325.7	545323	6.73062e+06	-49.0238	Mafic	CSBC		-23.9756	1.85713	3.40607	-2.36795	-3.28059	1.3799	0.0254561	-0.138708	0.0147013	92.3097	0.155389	-5.64854	5.2632
S1600040369	SVASJ280	306	306.85	545333	6.73061e+06	-37.8523	Mafic	CSBC		-17.7236	3.92624	3.93623	-2.50544	-3.51796	0.19348	0.0303644	0.173201	0.00946226	90.731	0.158425	-6.0234	7.86247
S1800011563	SVASJ269	48.3	48.7	545205	6.73067e+06	100.296	Mafic	Biotite schist	int. Phlog-chl-cord alt.	-1.03687	3.47878	3.231	-2.27357	-3.57889	0.764169	-0.0590794	-0.0676511	0.0190755	105.392	0.133729	-5.85246	6.70978
S1800011538	SVASJ290	240.2	240.5	545215	6.73047e+06	-30.3257	Mafic	CSBC	str. Chl-phlog-cord-antho alt.	-12.5279	1.96589	8.93464	-2.97945	-3.44211	0.27225	-0.0686855	-0.201666	0.0130746	85.2904	0.169749	-6.42157	10.9005
S1800011543	SVASJ290	493.7	494	545095	6.7306e+06	-209.823	Rhyolite	QCGA	Grt-antho rich rock skarn?	35.1655	19.5201	3.26217	-1.80075	-3.2492	-1.72242	-0.0808214	-0.325407	0.17	128.511	0.106235	-5.04994	22.7823
S1800011566	SVASJ269	95.75	96.1	545179	6.73069e+06	65.6966	Rhyolite	QCGA	chl alt. More mafic comp?	72.2574	13.9124	7.04799	-1.44418	-3.52794	-1.37544	-0.0834722	-0.346941	0.16525	125.959	0.108775	-4.97213	20.9604
S1700016236	SVASJ279	269.65	269.95	545182	6.73069e+06	-42.691	Rhyolite	QCGA	chl-phlog-cord-gt-antho (4-5)	25.2265	18.1528	6.46445	-1.80444	-3.5641	-1.78533	-0.0876257	-0.384027	0.1686	122.215	0.112693	-5.36854	24.6173
S1700016234	SVASJ279	255.8	256.1	545188	6.73068e+06	-33.2024	Rhyolite	QCGA	chl-cord-amph-grt ± cpy (4)	24.8506	11.1152	4.58858	-1.65228	-3.63562	-0.944094	-0.0795272	-0.307323	0.157167	129.807	0.104984	-5.28791	15.7038
S1800011572	SVASJ265	187.3	187.6	545190	6.73068e+06	10.5091	Rhyolite	CSBC	ser-cord-chl	-6.02481	3.3843	2.43721	-1.66623	-3.59231	0.26244	-0.0765865	-0.276935	0.152556	132.883	0.102112	-5.25853	5.82151
S1700016233	SVASJ279	252.15	252.45	545190	6.73068e+06	-30.6947	Rhyolite	CSBC	musc > chl-cord (5)	29.9537	-0.35416	7.52139	-1.81041	-3.59134	0.09201	-0.0831688	-0.339303	0.155167	126.245	0.108485	-5.40175	7.16723
S1700016237	SVASJ279	275.25	275.55	545179	6.73069e+06	-46.5161	Rhyolite	CSBC	chl-musc-cord (4)	-2.63146	4.48316	7.19141	-1.65948	-3.61572	-1.11756	-0.0746088	-0.25051	0.141333	135.061	0.100157	-5.2752	11.6746
S1800011561	SVASJ281	406.4	406.8	545185	6.73069e+06	-136.503	Rhyolite	QCGA	int. Chl alt.	-2.44689	11.7979	8.32987	-2.00113	-3.66603	-1.63253	-0.0927158	-0.414549	0.146143	118	0.1174	-5.66716	20.1278

## Sheet: Mass change downhole plot
Sample	Hole ID	From	To	X	Y	Z	Chemoclassification	Rock type	Logged alteration	SiO2_pct	Fe2O3_pct	MgO_pct	CaO_pct	Na2O_pct	K2O_pct	MnO_pct	TiO2	Zr/TiO2	Zr precursor	Al2O3/Zr	Δ CaO+Na2O	Δ Fe2O3T+MgO
S1700016222	SVASJ279	12.35	12.6	545297	6.73056e+06	145.657	Dacite C	SC	Chl > musc-cord (4)	-3.04449	2.04582	5.6316	-1.40798	-3.53135	-0.534786	-0.050982	0.18581	0.0275918	138.684	0.0970414	-4.93933	7.67742
S1700016215	SVASJ279	24.6	24.85	545291	6.73057e+06	136.166	Mafic	Metamafite	Weak	-29.3056	4.81189	3.11229	0.715668	-2.86515	0.767734	0.0443684	0.591492	0.00990845	112.708	0.12381	-2.14948	7.92418
S1700016216	SVASJ279	34.4	34.65	545287	6.73057e+06	128.586	Dacite A	SC	Musc-q-cord-chl (4)	-13.2769	0.0331513	5.87497	-1.08213	-3.37946	-0.764114	-0.0120677	0.17843	0.0461053	158.926	0.0822489	-4.46159	5.90812
S1700016217	SVASJ279	53.15	53.4	545279	6.73058e+06	114.153	Dacite C	SC	chl-musc-cord (4)	1.52091	0.746224	5.23041	-1.94193	-3.45144	0.468719	-0.0224217	-0.110446	0.0277436	114.909	0.121072	-5.39337	5.97663
S1700016218	SVASJ279	57.65	57.9	545277	6.73058e+06	110.701	Dacite A	Metamafite	cord-chl > musc (4)	-1.4682	0.0697242	3.77045	-1.51657	-2.90103	0.130382	-0.0221865	-0.0442602	0.0489286	137.601	0.0979562	-4.4176	3.84017
S1700016248	SVASJ279	70.85	71.15	545271	6.73059e+06	100.585	Dacite C	Feldspar-phyric metavolcanic rock	chl-phlog >> cord (3)	1.80925	-0.076931	0.95783	-0.190729	-0.842503	1.03179	-0.00709964	-0.146399	0.027641	112.101	0.124583	-1.03323	0.880898
S1700016220	SVASJ279	93.35	93.6	545261	6.7306e+06	83.5031	Dacite A	Feldspar-phyric metavolcanic rock	Chl (1)	0.191994	0.0785583	-0.335901	0.419039	0.295349	-1.07269	0.00909317	0.0232503	0.0666087	153.208	0.0860313	0.714388	-0.257343
S1700016221	SVASJ279	104.75	104.95	545256	6.7306e+06	74.9075	Dacite A	Feldspar-phyric metavolcanic rock	chl >> cord (1-2)	3.79661	1.62892	1.54496	1.67524	-0.948862	-1.03082	0.0247763	0.066466	0.0542308	152.186	0.0867376	0.726383	3.17388
S1700016223	SVASJ279	115.7	115.9	545252	6.73061e+06	66.6453	Dacite A	Feldspar-phyric metavolcanic rock	Least altered	6.96144	-0.572509	0.989632	0.212888	1.07568	-1.59358	-0.0105491	0.0349898	0.0528462	147.991	0.089738	1.28857	0.417124
S1700016224	SVASJ279	125.6	125.8	545247	6.73061e+06	59.1996	Mafic	Metamafite	chl-epid-mag (1)	-15.759	3.24713	-0.368928	-0.827087	-2.12329	0.303219	-0.0870381	-0.234819	0.00824176	69.5767	0.2124	-2.95038	2.8782
S1700016225	SVASJ279	157	157.3	545233	6.73063e+06	35.9762	Dacite A	SC	Musc-chl (1)	5.4117	2.02452	2.56541	0.997648	-1.42074	-0.474381	0.0747447	0.0174859	0.0458214	141.829	0.0944661	-0.423093	4.58993
S1700016226	SVASJ279	176.6	176.8	545225	6.73064e+06	21.9248	Dacite B	CSBC	musc > chl (3-4)	10.4102	1.01365	3.21708	-0.578163	-2.08946	-1.00272	0.0344904	0.191065	0.0951765	184.303	0.0682942	-2.66762	4.23072
S1700016227	SVASJ279	189.35	189.6	545219	6.73065e+06	12.8786	Dacite A	CSBC	Amph ± cord-phlog (3-4)	3.48839	12.845	9.86348	-0.68789	-3.7212	-1.8112	0.0446012	0.0678579	0.076	161.976	0.0803406	-4.40909	22.7085
S1700016228	SVASJ279	211.5	211.75	545209	6.73066e+06	-2.62263	Dacite B	CSBC	chl-phlog-cord (4-5)	11.1518	5.37878	12.6254	-0.372148	-3.70873	-2.50777	0.0227199	0.293841	0.0783684	192.885	0.0644056	-4.08087	18.0042
S1700016229	SVASJ279	226.3	226.6	545202	6.73067e+06	-12.8802	Dacite B	CSBC	musc-q-cord > chl-phlog (4-5)	2.81241	0.468744	2.66075	-0.69675	-3.61972	-0.662292	-0.0183425	0.26231	0.120375	201.329	0.0609034	-4.31647	3.12949
S1700016233	SVASJ279	252.15	252.45	545190	6.73068e+06	-30.6947	Rhyolite	CSBC	musc > chl-cord (5)	29.9537	-0.35416	7.52139	-1.81041	-3.59134	0.09201	-0.0831688	-0.339303	0.155167	126.245	0.108485	-5.40175	7.16723
S1700016234	SVASJ279	255.8	256.1	545188	6.73068e+06	-33.2024	Rhyolite	QCGA	chl-cord-amph-grt ± cpy (4)	24.8506	11.1152	4.58858	-1.65228	-3.63562	-0.944094	-0.0795272	-0.307323	0.157167	129.807	0.104984	-5.28791	15.7038
S1700016235	SVASJ279	262.05	262.35	545185	6.73069e+06	-37.4894	Dacite A	Feldspar-phyric metavolcanic rock	q-ser > chl (3) grt	1.59456	-0.57379	-0.479776	1.33398	-0.502017	-1.74762	0.0241619	-0.0387965	0.0665909	146.217	0.091058	0.831967	-1.05357
S1700016236	SVASJ279	269.65	269.95	545182	6.73069e+06	-42.691	Rhyolite	QCGA	chl-phlog-cord-gt-antho (4-5)	25.2265	18.1528	6.46445	-1.80444	-3.5641	-1.78533	-0.0876257	-0.384027	0.1686	122.215	0.112693	-5.36854	24.6173
S1700016237	SVASJ279	275.25	275.55	545179	6.73069e+06	-46.5161	Rhyolite	CSBC	chl-musc-cord (4)	-2.63146	4.48316	7.19141	-1.65948	-3.61572	-1.11756	-0.0746088	-0.25051	0.141333	135.061	0.100157	-5.2752	11.6746
S1700016238	SVASJ279	289.1	289.35	545173	6.7307e+06	-55.9072	Dacite A	CSBC	musc-phlog-cord (3-4)	0.43306	-0.264023	4.17369	-1.47858	-3.57973	0.220804	-0.00631158	-0.0530235	0.0640455	143.718	0.0929737	-5.05831	3.90966
S1700016239	SVASJ279	311.35	311.65	545162	6.73072e+06	-70.7664	Dacite A	CSBC	phlog-amph-gt-cord (4) po-py > sph	-29.9741	21.5408	7.95786	-0.062915	-3.64494	-0.605998	1.07752	-0.0960264	0.090375	146.281	0.0910097	-3.70785	29.4987
S1700016240	SVASJ279	321.5	321.9	545158	6.73072e+06	-77.4602	Dacite A	Feldspar-phyric metavolcanic rock	musc-bt-q (1-2)	-1.74427	-0.86413	0.14447	-0.36792	-0.365663	0.661956	-0.00603457	-0.0707501	0.0842778	147.841	0.0898484	-0.733583	-0.71966
S1700016241	SVASJ279	344.2	344.5	545147	6.73074e+06	-92.2065	Dacite A	Feldspar-phyric metavolcanic rock	musc-bt-q (1-2)	-1.12152	-0.711851	0.446203	0.063571	-0.415923	-0.76525	-0.0187551	0.00437088	0.0898333	158.151	0.0827458	-0.352352	-0.265648
S1700016242	SVASJ279	374.35	374.65	545134	6.73075e+06	-111.714	Dacite A	Feldspar-phyric metavolcanic rock	fsp (1) Least altered	4.62542	0.42305	-0.0933694	0.335269	-0.46051	0.843403	0.0542065	0.102801	0.0836316	168.882	0.0762744	-0.125241	0.329681
S1700016243	SVASJ279	406.2	406.5	545120	6.73077e+06	-132.048	Dacite A	Feldspar-phyric metavolcanic rock	musc >> chl (1)	-0.0316397	0.15653	0.6754	-0.231054	-0.267305	-0.526598	0.0343617	0.0507002	0.0802	161.234	0.080798	-0.498359	0.83193
S1700016244	SVASJ279	445	445.3	545104	6.7308e+06	-155.909	Dacite A	Feldspar-phyric metavolcanic rock	q-bt (1-2)	4.7059	0.219932	-0.19447	-0.109209	0.74179	-0.429032	0.018232	0.081233	0.0739524	162.893	0.0797811	0.632581	0.0254618

## Sheet: Mass change statistics
Sample	Hole ID	From	To	X	Y	Z	Chemoclassification	Rock type	Logged alteration	SiO2_pct	Fe2O3_pct	MgO_pct	CaO_pct	Na2O_pct	K2O_pct	MnO_pct	TiO2	Zr/TiO2	Zr precursor	Al2O3/Zr	Δ CaO+Na2O	Δ Fe2O3T+MgO
S1800011539	SVASJ290	296.6	296.85	545189	6.73049e+06	-72.703	Dacite A	Biotite schist	int. Phlog alt.	3.99245	1.36116	4.23455	-0.686874	-2.70674	-0.677252	-0.0156901	0.0765719	0.0607083	156.736	0.0836651	-3.39361	5.59571
S1800011549	SVASJ288	408.35	408.65	545344	6.7306e+06	-157.421	Dacite C	Biotite schist	int. Bt>cord-chl>grt	-18.8239	1.74808	1.66	0.611464	-1.38201	-0.00708967	0.0575653	0.0605713	0.0295385	130.737	0.104102	-0.770549	3.40808
S1800011563	SVASJ269	48.3	48.7	545205	6.73067e+06	100.296	Mafic	Biotite schist	int. Phlog-chl-cord alt.	-1.03687	3.47878	3.231	-2.27357	-3.57889	0.764169	-0.0590794	-0.0676511	0.0190755	105.392	0.133729	-5.85246	6.70978
									Median	-1.03687	1.74808	3.231	-0.686874	-2.70674	-0.00708967	-0.0156901
									MAD	5.02932	0.386922	1.00355	1.29834	0.872148	0.670163	0.0433892
									Max gain	3.99245	3.47878	4.23455	0.611464	-1.38201	0.764169	0.0575653
									Max loss	-18.8239	1.36116	1.66	-2.27357	-3.57889	-0.677252	-0.0590794
S1800011567	SVASJ265	74.2	74.5	545249	6.73063e+06	92.5761	Dacite A	CSBC	ser-cord-chl	0.831028	1.4471	4.4275	-0.598037	-1.49047	-0.739979	-0.00822448	0.0643354	0.0551538	152.469	0.0865411	-2.0885	5.8746
S1800011574	SVASJ265	247.6	248	545158	6.73071e+06	-31.4135	Dacite A	CSBC	phlog-amph-qtz alt.	-14.4479	17.3736	2.6393	-0.229419	-3.40904	-2.16601	0.0531716	-0.00822552	0.084	155.14	0.0847222	-3.63846	20.0129
S1700016239	SVASJ279	311.35	311.65	545162	6.73072e+06	-70.7664	Dacite A	CSBC	phlog-amph-gt-cord (4) po-py > sph	-29.9741	21.5408	7.95786	-0.062915	-3.64494	-0.605998	1.07752	-0.0960264	0.090375	146.281	0.0910097	-3.70785	29.4987
S1700016227	SVASJ279	189.35	189.6	545219	6.73065e+06	12.8786	Dacite A	CSBC	Amph ± cord-phlog (3-4)	3.48839	12.845	9.86348	-0.68789	-3.7212	-1.8112	0.0446012	0.0678579	0.076	161.976	0.0803406	-4.40909	22.7085
S1800011537	SVASJ290	206.6	206.95	545230	6.73045e+06	-4.53301	Dacite A	CSBC	int. ser-cord-phlog-serp alt.	22.4684	-2.01073	2.1514	-2.0624	-3.47531	1.47021	-0.0783418	-0.309385	0.0712857	119.906	0.11523	-5.53772	0.140662
S1800011553	SVASJ288	613.1	613.4	545278	6.73072e+06	-303.15	Dacite A	CSBC	ser-chl-cord-phlog alt.	-1.11418	5.54577	7.87021	-1.36196	-3.57283	-1.15791	0.0416453	0.0356119	0.0478929	145.048	0.0919463	-4.93479	13.416
S1800011568	SVASJ265	121.45	121.8	545226	6.73065e+06	56.9786	Dacite A	CSBC	Ser-chl>phlog alt.	1.724	0.91622	3.72737	-1.15413	-3.60185	-0.041405	-0.0133395	0.0608959	0.0823684	163.164	0.0796166	-4.75598	4.64359
S1700016238	SVASJ279	289.1	289.35	545173	6.7307e+06	-55.9072	Dacite A	CSBC	musc-phlog-cord (3-4)	0.43306	-0.264023	4.17369	-1.47858	-3.57973	0.220804	-0.00631158	-0.0530235	0.0640455	143.718	0.0929737	-5.05831	3.90966
S1700016226	SVASJ279	176.6	176.8	545225	6.73064e+06	21.9248	Dacite B	CSBC	musc > chl (3-4)	10.4102	1.01365	3.21708	-0.578163	-2.08946	-1.00272	0.0344904	0.191065	0.0951765	184.303	0.0682942	-2.66762	4.23072
S1800011550	SVASJ288	431.9	432.25	545337	6.73061e+06	-174.814	Dacite B	CSBC	str. Ser-cord>chl alt.	10.1015	3.1576	3.99575	-0.583175	-3.67892	-0.864263	0.0298369	0.270699	0.107375	199.489	0.0616414	-4.26209	7.15335
S1700016228	SVASJ279	211.5	211.75	545209	6.73066e+06	-2.62263	Dacite B	CSBC	chl-phlog-cord (4-5)	11.1518	5.37878	12.6254	-0.372148	-3.70873	-2.50777	0.0227199	0.293841	0.0783684	192.885	0.0644056	-4.08087	18.0042
S1800011569	SVASJ265	149.7	149.95	545211	6.73067e+06	36.7281	Dacite B	CSBC	str. Cord-chl-ser-phlog alt. Trem?	-17.3097	1.07557	8.50159	-0.666241	-3.59034	-1.89218	0.0200681	0.205698	0.1039	188.789	0.0662175	-4.25658	9.57716
S1800011542	SVASJ290	448.85	449.15	545117	6.73057e+06	-179.92	Dacite B	CSBC	w. str. cg ser-phlog-serp>cord alt.	-3.13076	-0.25733	3.69243	-0.648281	-3.65605	-0.979243	-0.0200653	0.242548	0.125688	199.318	0.0617106	-4.30434	3.4351
S1700016229	SVASJ279	226.3	226.6	545202	6.73067e+06	-12.8802	Dacite B	CSBC	musc-q-cord > chl-phlog (4-5)	2.81241	0.468744	2.66075	-0.69675	-3.61972	-0.662292	-0.0183425	0.26231	0.120375	201.329	0.0609034	-4.31647	3.12949
S1800011564	SVASJ269	65.75	66.05	545195	6.73067e+06	87.5931	Dacite B	CSBC	ser-chl-cord	73.6203	4.78887	2.30163	-0.900798	-3.69174	-0.308527	0.00436648	0.0827856	0.1225	174.964	0.0729592	-4.59254	7.09051
S1600040370	SVASJ280	249.3	250.1	545362	6.73058e+06	-4.42329	Dacite C	CSBC		-16.4808	10.8888	10.1382	-1.61273	-3.60914	-1.85647	0.0586562	0.00620372	0.0297857	126.495	0.108233	-5.22187	21.0271
S1600040381	SVASJ280	314.8	315.6	545329	6.73062e+06	-42.9729	Mafic	CSBC		-8.85766	2.88138	0.705191	0.648943	-0.986734	-0.530216	0.0289362	0.0608651	0.0204167	116.478	0.119184	-0.337791	3.58657
S1600040374	SVASJ280	331.9	332.1	545320	6.73063e+06	-52.7257	Mafic	CSBC		-10.9066	2.75132	0.288574	0.495563	-1.70636	0.875301	-0.0173037	-0.0465695	0.0158507	100.042	0.141902	-1.2108	3.03989
S1800011552	SVASJ288	565.4	565.7	545294	6.73069e+06	-270.881	Mafic	CSBC	int. Ser-cord-chl alt.	-21.3822	1.22082	2.78356	-1.27759	-2.13984	-0.755295	-0.00986328	-0.095041	0.0133452	91.2787	0.15736	-3.41742	4.00437
S1600040376	SVASJ280	325.5	325.7	545323	6.73062e+06	-49.0238	Mafic	CSBC		-23.9756	1.85713	3.40607	-2.36795	-3.28059	1.3799	0.0254561	-0.138708	0.0147013	92.3097	0.155389	-5.64854	5.2632
S1600040369	SVASJ280	306	306.85	545333	6.73061e+06	-37.8523	Mafic	CSBC		-17.7236	3.92624	3.93623	-2.50544	-3.51796	0.19348	0.0303644	0.173201	0.00946226	90.731	0.158425	-6.0234	7.86247
S1800011538	SVASJ290	240.2	240.5	545215	6.73047e+06	-30.3257	Mafic	CSBC	str. Chl-phlog-cord-antho alt.	-12.5279	1.96589	8.93464	-2.97945	-3.44211	0.27225	-0.0686855	-0.201666	0.0130746	85.2904	0.169749	-6.42157	10.9005
S1800011572	SVASJ265	187.3	187.6	545190	6.73068e+06	10.5091	Rhyolite	CSBC	ser-cord-chl	-6.02481	3.3843	2.43721	-1.66623	-3.59231	0.26244	-0.0765865	-0.276935	0.152556	132.883	0.102112	-5.25853	5.82151
S1700016233	SVASJ279	252.15	252.45	545190	6.73068e+06	-30.6947	Rhyolite	CSBC	musc > chl-cord (5)	29.9537	-0.35416	7.52139	-1.81041	-3.59134	0.09201	-0.0831688	-0.339303	0.155167	126.245	0.108485	-5.40175	7.16723
S1700016237	SVASJ279	275.25	275.55	545179	6.73069e+06	-46.5161	Rhyolite	CSBC	chl-musc-cord (4)	-2.63146	4.48316	7.19141	-1.65948	-3.61572	-1.11756	-0.0746088	-0.25051	0.141333	135.061	0.100157	-5.2752	11.6746
									Median	-2.63146	2.75132	3.93623	-0.900798	-3.59034	-0.662292	0.00436648
									MAD	11.8164	1.8351	1.6346	0.577781	0.0885805	0.754302	0.0254704
									Max gain	73.6203	21.5408	12.6254	0.648943	-0.986734	1.47021	1.07752
									Max loss	-29.9741	-2.01073	0.288574	-2.97945	-3.7212	-2.50777	-0.0831688
S1700016235	SVASJ279	262.05	262.35	545185	6.73069e+06	-37.4894	Dacite A	Feldspar-phyric metavolcanic rock	q-ser > chl (3) grt	1.59456	-0.57379	-0.479776	1.33398	-0.502017	-1.74762	0.0241619	-0.0387965	0.0665909	146.217	0.091058	0.831967	-1.05357
S1700016220	SVASJ279	93.35	93.6	545261	6.7306e+06	83.5031	Dacite A	Feldspar-phyric metavolcanic rock	Chl (1)	0.191994	0.0785583	-0.335901	0.419039	0.295349	-1.07269	0.00909317	0.0232503	0.0666087	153.208	0.0860313	0.714388	-0.257343
S1800011548	SVASJ288	348	348.3	545364	6.73056e+06	-112.3	Dacite A	Feldspar-phyric metavolcanic rock	mag-rich	0.0328633	0.0488474	-0.069011	0.222619	0.661098	-1.16514	-4.1707e-05	0.0413518	0.064	154.205	0.0853516	0.883716	-0.0201636
S1700016223	SVASJ279	115.7	115.9	545252	6.73061e+06	66.6453	Dacite A	Feldspar-phyric metavolcanic rock	Least altered	6.96144	-0.572509	0.989632	0.212888	1.07568	-1.59358	-0.0105491	0.0349898	0.0528462	147.991	0.089738	1.28857	0.417124
S1700016244	SVASJ279	445	445.3	545104	6.7308e+06	-155.909	Dacite A	Feldspar-phyric metavolcanic rock	q-bt (1-2)	4.7059	0.219932	-0.19447	-0.109209	0.74179	-0.429032	0.018232	0.081233	0.0739524	162.893	0.0797811	0.632581	0.0254618
S1700016241	SVASJ279	344.2	344.5	545147	6.73074e+06	-92.2065	Dacite A	Feldspar-phyric metavolcanic rock	musc-bt-q (1-2)	-1.12152	-0.711851	0.446203	0.063571	-0.415923	-0.76525	-0.0187551	0.00437088	0.0898333	158.151	0.0827458	-0.352352	-0.265648
S1700016221	SVASJ279	104.75	104.95	545256	6.7306e+06	74.9075	Dacite A	Feldspar-phyric metavolcanic rock	chl >> cord (1-2)	3.79661	1.62892	1.54496	1.67524	-0.948862	-1.03082	0.0247763	0.066466	0.0542308	152.186	0.0867376	0.726383	3.17388
S1800011575	SVASJ265	316.2	316.55	545121	6.73075e+06	-79.0497	Dacite A	Feldspar-phyric metavolcanic rock	least altered. bt wisps -> pumice?	0.615135	-0.739461	-0.407575	0.32701	-0.362766	0.912475	-0.0156574	0.0548763	0.0809	161.967	0.0803461	-0.0357562	-1.14704
S1700016243	SVASJ279	406.2	406.5	545120	6.73077e+06	-132.048	Dacite A	Feldspar-phyric metavolcanic rock	musc >> chl (1)	-0.0316397	0.15653	0.6754	-0.231054	-0.267305	-0.526598	0.0343617	0.0507002	0.0802	161.234	0.080798	-0.498359	0.83193
S1700016242	SVASJ279	374.35	374.65	545134	6.73075e+06	-111.714	Dacite A	Feldspar-phyric metavolcanic rock	fsp (1) Least altered	4.62542	0.42305	-0.0933694	0.335269	-0.46051	0.843403	0.0542065	0.102801	0.0836316	168.882	0.0762744	-0.125241	0.329681
S1700016240	SVASJ279	321.5	321.9	545158	6.73072e+06	-77.4602	Dacite A	Feldspar-phyric metavolcanic rock	musc-bt-q (1-2)	-1.74427	-0.86413	0.14447	-0.36792	-0.365663	0.661956	-0.00603457	-0.0707501	0.0842778	147.841	0.0898484	-0.733583	-0.71966
S1800011545	SVASJ290	600.95	601.25	545041	6.73066e+06	-278.631	Dacite A	Feldspar-phyric metavolcanic rock	weak. Phlog alt or primary bt?	1.79997	-1.18531	-0.857162	-0.658401	-1.2558	3.7412	0.00405355	-0.134748	0.0568261	132.432	0.102525	-1.9142	-2.04248
S1700016248	SVASJ279	70.85	71.15	545271	6.73059e+06	100.585	Dacite C	Feldspar-phyric metavolcanic rock	chl-phlog >> cord (3)	1.80925	-0.076931	0.95783	-0.190729	-0.842503	1.03179	-0.00709964	-0.146399	0.027641	112.101	0.124583	-1.03323	0.880898
									Median	1.59456	-0.076931	-0.069011	0.212888	-0.365663	-0.526598	0.00405355
									MAD	1.6262	0.496859	0.410765	0.322097	0.47684	1.06699	0.0146026
									Max gain	6.96144	1.62892	1.54496	1.67524	1.07568	3.7412	0.0542065
									Max loss	-1.74427	-1.18531	-0.857162	-0.658401	-1.2558	-1.74762	-0.0187551
S1600040368	SVASJ280	234.1	234.35	545370	6.73057e+06	5.02607	Dacite A	Metamafite		8.44989	4.18677	2.02088	0.391375	-1.05897	-1.63567	0.0660863	0.327044	0.0466061	176.348	0.0722367	-0.667594	6.20766
S1700016218	SVASJ279	57.65	57.9	545277	6.73058e+06	110.701	Dacite A	Metamafite	cord-chl > musc (4)	-1.4682	0.0697242	3.77045	-1.51657	-2.90103	0.130382	-0.0221865	-0.0442602	0.0489286	137.601	0.0979562	-4.4176	3.84017
S1800011551	SVASJ288	499.7	500	545315	6.73065e+06	-224.273	Mafic	Metamafite	amph-rich	-10.2968	4.13522	-2.29321	1.40463	1.02186	-0.90183	0.0735845	0.0917878	0.00830097	82.0559	0.177193	2.42649	1.84201
S1600040386	SVASJ281	92.25	92.5	545323	6.73052e+06	88.1852	Mafic	Metamafite		-12.7654	2.07335	-2.26356	3.15486	-0.71466	-0.146627	0.00554178	-0.273114	0.0138769	83.6278	0.173503	2.4402	-0.190205
S1600040372	SVASJ280	225.55	225.7	545374	6.73056e+06	10.3344	Mafic	Metamafite		-23.4087	6.31536	1.37353	1.13347	-1.48384	-1.65857	0.128405	0.617262	0.0139649	134.813	0.100377	-0.350372	7.68889
S1700016224	SVASJ279	125.6	125.8	545247	6.73061e+06	59.1996	Mafic	Metamafite	chl-epid-mag (1)	-15.759	3.24713	-0.368928	-0.827087	-2.12329	0.303219	-0.0870381	-0.234819	0.00824176	69.5767	0.2124	-2.95038	2.8782
S1700016215	SVASJ279	24.6	24.85	545291	6.73057e+06	136.166	Mafic	Metamafite	Weak	-29.3056	4.81189	3.11229	0.715668	-2.86515	0.767734	0.0443684	0.591492	0.00990845	112.708	0.12381	-2.14948	7.92418
									Median	-12.7654	4.13522	1.37353	0.715668	-1.48384	-0.146627	0.0443684
									MAD	10.6432	0.888085	1.74245	0.688963	0.769177	0.755203	0.0388267
									Max gain	8.44989	6.31536	3.77045	3.15486	1.02186	0.767734	0.128405
									Max loss	-29.3056	0.0697242	-2.29321	-1.51657	-2.90103	-1.65857	-0.0870381
S1800011560	SVASJ281	366.05	366.45	545201	6.73067e+06	-108.978	Dacite B	QCGA	w. mag+py	35.2888	13.2581	50.789	-0.52816	-3.54263	-2.10676	0.11806	0.177307	0.0872	179.941	0.0704128	-4.07079	64.047
S1800011543	SVASJ290	493.7	494	545095	6.7306e+06	-209.823	Rhyolite	QCGA	Grt-antho rich rock skarn?	35.1655	19.5201	3.26217	-1.80075	-3.2492	-1.72242	-0.0808214	-0.325407	0.17	128.511	0.106235	-5.04994	22.7823
S1800011566	SVASJ269	95.75	96.1	545179	6.73069e+06	65.6966	Rhyolite	QCGA	chl alt. More mafic comp?	72.2574	13.9124	7.04799	-1.44418	-3.52794	-1.37544	-0.0834722	-0.346941	0.16525	125.959	0.108775	-4.97213	20.9604
S1700016236	SVASJ279	269.65	269.95	545182	6.73069e+06	-42.691	Rhyolite	QCGA	chl-phlog-cord-gt-antho (4-5)	25.2265	18.1528	6.46445	-1.80444	-3.5641	-1.78533	-0.0876257	-0.384027	0.1686	122.215	0.112693	-5.36854	24.6173
S1700016234	SVASJ279	255.8	256.1	545188	6.73068e+06	-33.2024	Rhyolite	QCGA	chl-cord-amph-grt ± cpy (4)	24.8506	11.1152	4.58858	-1.65228	-3.63562	-0.944094	-0.0795272	-0.307323	0.157167	129.807	0.104984	-5.28791	15.7038
S1800011561	SVASJ281	406.4	406.8	545185	6.73069e+06	-136.503	Rhyolite	QCGA	int. Chl alt.	-2.44689	11.7979	8.32987	-2.00113	-3.66603	-1.63253	-0.0927158	-0.414549	0.146143	118	0.1174	-5.66716	20.1278
									Median	30.196	13.5852	6.75622	-1.72652	-3.55337	-1.67748	-0.0821468
									MAD	5.21913	2.12866	1.87065	0.176265	0.0538392	0.204942	0.0040493
									Max gain	72.2574	19.5201	50.789	-0.52816	-3.2492	-0.944094	0.11806
									Max loss	-2.44689	11.1152	3.26217	-2.00113	-3.66603	-2.10676	-0.0927158
S1700016225	SVASJ279	157	157.3	545233	6.73063e+06	35.9762	Dacite A	SC	Musc-chl (1)	5.4117	2.02452	2.56541	0.997648	-1.42074	-0.474381	0.0747447	0.0174859	0.0458214	141.829	0.0944661	-0.423093	4.58993
S1800011546	SVASJ288	93.55	93.95	545450	6.73042e+06	84.7237	Dacite A	SC	str. Ser-phlog alt.	13.9238	-0.0242133	0.358434	-0.942219	-1.14077	-0.150662	-0.0393466	-0.163063	0.0812	136.843	0.0986043	-2.08299	0.334221
S1600040371	SVASJ280	210.9	211.1	545382	6.73055e+06	19.4335	Dacite A	SC		15.2911	-0.0484362	-0.270175	-1.38866	-2.68081	1.78052	-0.037628	-0.137223	0.0760625	138.39	0.0972884	-4.06947	-0.318612
S1600040382	SVASJ281	165.2	165.4	545291	6.73056e+06	34.0959	Dacite A	SC	Coherent?	31.8123	-1.30141	2.36019	-1.93677	-2.45624	0.744683	-0.0491082	-0.322289	0.047	111.365	0.125532	-4.39302	1.05879
S1800011562	SVASJ269	32.6	32.9	545213	6.73066e+06	112.132	Dacite A	SC	ser-chl schist	-2.29033	1.14199	3.69381	-0.914975	-2.92686	-0.0316942	0.000971576	0.0793426	0.0566667	154.969	0.0848366	-3.84184	4.83579
S1800011544	SVASJ290	525.4	525.7	545079	6.73062e+06	-230.64	Dacite A	SC	str. Ser-phlog+Si alt.	-2.34592	-1.32274	4.20978	-1.28174	-2.6541	1.31655	-0.020868	-0.0791626	0.0611739	139.829	0.096091	-3.93584	2.88704
S1800011536	SVASJ290	144.3	144.6	545258	6.73042e+06	44.2153	Dacite A	SC		14.7787	-0.756571	0.698335	-1.17242	-3.48827	1.31009	-0.0321574	-0.070103	0.076	145.753	0.0914087	-4.66069	-0.0582358
S1700016216	SVASJ279	34.4	34.65	545287	6.73057e+06	128.586	Dacite A	SC	Musc-q-cord-chl (4)	-13.2769	0.0331513	5.87497	-1.08213	-3.37946	-0.764114	-0.0120677	0.17843	0.0461053	158.926	0.0822489	-4.46159	5.90812
S1800011547	SVASJ288	243.05	243.35	545399	6.7305e+06	-32.6026	Dacite A	SC	qtz-porphyry	6.34314	-0.907485	2.57625	-1.45893	-3.53987	0.907884	-0.0375435	-0.104682	0.0743333	141.453	0.0947683	-4.99879	1.66877
S1800011573	SVASJ265	229.3	229.7	545168	6.7307e+06	-18.7013	Dacite A	SC	ser-cord + phlog? Alt.	-0.0384925	-0.877061	3.32041	-1.61747	-3.55317	0.560118	-0.0231403	-0.112727	0.0620455	136.668	0.0987546	-5.17064	2.44334
S1600040375	SVASJ280	186.85	187.05	545394	6.73054e+06	34.525	Dacite B	SC		7.03423	-0.0973187	0.0631189	0.00995839	2.03547	-2.75997	-0.00356491	0.151227	0.105813	181.388	0.0696988	2.04543	-0.0341999
S1800011540	SVASJ290	412.6	412.9	545134	6.73055e+06	-155.409	Dacite B	SC	ser-cord alt.	-1.45691	-0.262323	2.30666	-0.814136	-3.59985	-0.134809	-0.0246046	0.257788	0.07532	186.453	0.0672862	-4.41399	2.04434
S1600040383	SVASJ281	161.65	161.9	545293	6.73056e+06	36.6885	Dacite C	SC	Sediment?	5.05338	-0.183324	1.59649	-1.86454	-1.62787	0.567679	-0.0465759	-0.211015	0.0265	106.196	0.132572	-3.49241	1.41317
S1700016217	SVASJ279	53.15	53.4	545279	6.73058e+06	114.153	Dacite C	SC	chl-musc-cord (4)	1.52091	0.746224	5.23041	-1.94193	-3.45144	0.468719	-0.0224217	-0.110446	0.0277436	114.909	0.121072	-5.39337	5.97663
S1700016222	SVASJ279	12.35	12.6	545297	6.73056e+06	145.657	Dacite C	SC	Chl > musc-cord (4)	-3.04449	2.04582	5.6316	-1.40798	-3.53135	-0.534786	-0.050982	0.18581	0.0275918	138.684	0.0970414	-4.93933	7.67742
S1800011559	SVASJ281	291	291.4	545234	6.73063e+06	-56.4834	Mafic	SC	mod. Chl-ser alt.	-6.75332	2.5245	-1.71878	-0.501302	-1.7483	0.232725	-0.110563	-0.292072	0.00762791	65.3325	0.227439	-2.2496	0.805712
									Median	3.28714	-0.0728775	2.4628	-1.22708	-2.80384	0.350722	-0.028381
									MAD	5.60527	0.811642	1.75572	0.351248	0.731772	0.529273	0.0136395
									Max gain	31.8123	2.5245	5.87497	0.997648	2.03547	1.78052	0.0747447
									Max loss	-13.2769	-1.32274	-1.71878	-1.94193	-3.59985	-2.75997	-0.110563
